# Supplementary material for: N-Heterocyclic carbene catalyzed base assisted C–C bond cleavage of cyclopropenones: an approach towards diastereoselective synthesis of azetidinones and benzoxazepines
Source: Royal Society of Chemistry journal article supplement (doi:10.1039/d3qo01328f), 2023-01-01
Supplement: d3qo01328f1.pdf [file d3qo01328f1.pdf]

## Supporting Information

### **NHC-catalyzed base assisted C-C bond cleavage of cyclopropenone: an approach towards synthesis of azetidinone and benzoxazepines**

Tanmayee Nanda,<sup>a,b</sup> Asish Dharmendra Shukla,<sup>a,b</sup> Shubham Kumar Dhal,<sup>a,b</sup> Muhammed Fastheem,<sup>a,b</sup> and Ponneri C. Ravikumar\*<sup>a,b</sup>

<sup>a</sup>School of chemical sciences, National Institute of Science Education and Research (NISER) Bhubaneswar, Jatani, Odisha 752050.

<sup>b</sup>Homi Bhabha National Institute (HBNI), Training School Complex, Anushaktinagar, Mumbai, 400094, India  
*E-mail:* [pcr@niser.ac.in](mailto:pcr@niser.ac.in)

### Table of Contents

|                                                                                                          |     |
|----------------------------------------------------------------------------------------------------------|-----|
| 1. General information.....                                                                              | S2  |
| 2. Experimental procedure .....                                                                          | S3  |
| (a) General Procedure for <i>N</i> -Protection of Aminophenol <b>1</b>                                   |     |
| (b) General Procedure for the Synthesis of Cyclopropenones <b>2</b> (Method A)                           |     |
| (c) General Procedure for the synthesis of four membered 2-azetidinone derivatives <b>3</b> .            |     |
| (d) General Procedure for synthesis of seven membered benzoxazepine derivative <b>5</b> .                |     |
| (e) General Procedure for 1 mmol scale synthesis of 2-azetidinone derivatives <b>3aa</b> .               |     |
| 3. Control and mechanistic experiments.....                                                              | S5  |
| (a) Procedure for reaction without ligand                                                                |     |
| (b) Procedure for reaction with base and without catalyst for prolonged time                             |     |
| (c) The role of hydroxy group                                                                            |     |
| (d) Reaction to ascertain the Intermediacy of $\beta$ -lactam                                            |     |
| (e) Reaction to ascertain the Intermediacy of acyl azolium                                               |     |
| 4. Experimental data ( <sup>1</sup> H, <sup>13</sup> C{ <sup>1</sup> H}, and <sup>19</sup> F NMR) .....  | S11 |
| 5. Copies of NMR data ( <sup>1</sup> H, <sup>13</sup> C{ <sup>1</sup> H}, and <sup>19</sup> F NMR) ..... | S28 |
| 6. Crystallographic data .....                                                                           | S61 |
| 7. References .....                                                                                      | S69 |

## 1. General Information:<sup>1</sup>

Reactions were performed using borosil schlenk tube vial under N<sub>2</sub> atmosphere. Column chromatography was done by using 100-200 & 230-400 mesh size silica gel of Acme Chemicals. A gradient elution was performed by using distilled petroleum ether and ethyl acetate. TLC plates detected under UV light at 254 nm. <sup>1</sup>H NMR and <sup>13</sup>C NMR were recorded on Bruker AV 400, 700 MHz spectrometer using CDCl<sub>3</sub> and DMSO-*d*<sub>6</sub> as NMR solvents. The residual CHCl<sub>3</sub> and DMSO-*H*<sub>6</sub> for <sup>1</sup>H NMR ( $\delta$  = 7.26 ppm and 2.54 ppm respectively) were used as reference. The deuterated solvent signal for <sup>13</sup>C NMR ( $\delta$  = 77.36 ppm 40.45 ppm) is used as reference.<sup>2</sup> Multiplicity (s = single, d = doublet, t = triplet, q = quartet, m = multiplet, dd = double doublet), integration, and coupling constants (*J*) in hertz (Hz). HRMS signal analysis was performed using micro TOF Q-II mass spectrometer. X-ray analysis was conducted using Rigaku Smartlab X-ray diffractometer at SCS, NISER. Reagents and starting materials were purchased from Sigma Aldrich, Alfa Aesar, TCI, Avra, Spectrochem and other commercially available sources and used without further purification unless otherwise noted.

### Abbreviations:

TEMPO = 2,2,6,6-Tetramethylpiperidine 1-oxyl, BHT = Butylated hydroxytoluene, TLC = Thin layer chromatography, EtOAc = Ethyl acetate, DCM = Dichloromethane, MeOH = Methanol, IPr·HCl = 1,3-Bis(2,6-diisopropylphenyl) imidazole-2-ylidene, AlCl<sub>3</sub> = Aluminium chloride, NaHCO<sub>3</sub> = Sodium bicarbonate, Na<sub>2</sub>SO<sub>4</sub> = Sodium sulphate, DMF = Dimethyl formamide.

## 2. General procedures:

### (a) General Procedure for *N*-Protection of Aminophenol 1:<sup>3</sup>

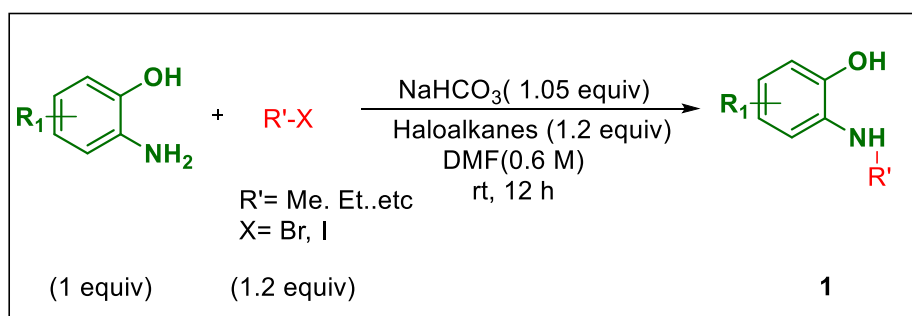

To an oven dried seal tube charged with a stir bar, sodium bicarbonate (0.95 mmol, 1.05 equiv) was added under nitrogen atmosphere and vacuum was applied. *Ortho*-aminophenol (0.91 mmol, 1 equiv) followed by dimethylformamide (1.51 ml, 0.6 M) were added under nitrogen atmosphere. The resulting solution was kept under ice bath followed by dropwise addition of halo alkanes (1.09 mmol, 1.2 equiv) where  $R' = (\text{Methyl, ethyl, etc})$  and  $X = (\text{I, and Br})$ . The mixture was allowed to stir for 12 h at room temperature. After completion of the reaction (monitored by TLC), the organic phase was washed thrice with DCM, dried over anhydrous  $Na_2SO_4$ , filtered, and evaporated under reduced pressure. The residue was purified by flash column chromatography on silica gel using EtOAc /hexane as eluent to provide the desired product. The product **1** was directly used for the next step.

### (b) General Procedure for the Synthesis of Cyclopropenones 2:<sup>4</sup>

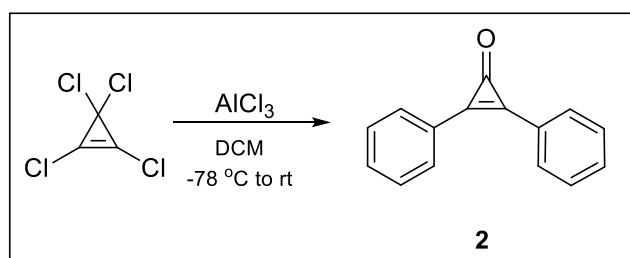

To a suspension of tetra chloro-cyclopropene **1**, (0.64 mmol, 1 equiv) and anhydrous  $AlCl_3$  (1.35 mmol, 1.05 equiv) in  $CH_2Cl_2$  (0.06M, 10 mL) was added dropwise a solution of benzene (1.28 mmol, 2equiv) in  $CH_2Cl_2$  (1.2 M, 1 mL) at  $-78\text{ }^\circ\text{C}$ . The mixture was stirred for 2 h, warmed to room temperature, and stirred for another 2 h. After completion of the reaction as monitored by TLC analysis, the resulting mixture was quenched with water, diluted with  $CH_2Cl_2$ , and washed with water ( $2 \times 50\text{ mL}$ ) and brine ( $2 \times 50\text{ mL}$ ). The organic layers were dried over anhydrous  $Na_2SO_4$ , filtered, and concentrated under reduced pressure to yield the

crude residue as an orange oil. The crude residue was then purified by flash column chromatography on silica gel (20% EtOAc in hexanes) to afford diaryl cyclopropanone **2**, (175 mg, 85% yield) as a white solid.

**(c) General Procedure for the synthesis of four membered 2-azetidinone derivatives 3:**

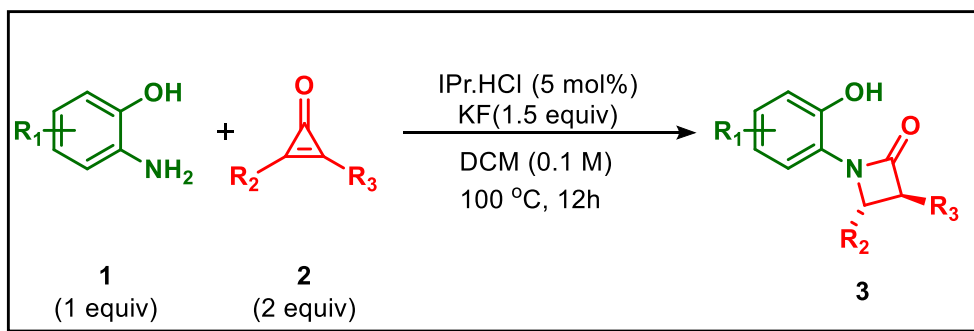

To an oven dried seal tube charged with a stir bar, *o*-aminophenol **1** (0.1 mmol, 1 equiv), diphenylcyclopropanone **2** (0.2 mmol, 2.00 equiv), IPr.HCl (0.005 mmol, 0.05 equiv), were added under nitrogen atmosphere and vacuum was applied. Dichloromethane (1 mL, 0.1 M) was added under nitrogen atmosphere and seal tube was sealed. Potassium fluoride (0.15 mmol, 1.5 equiv) was added inside the glove box and the reaction mixture was stirred (700 rpm) in a preheated aluminium block at **100 °C for 12 h**. After completion of the reaction (monitored by TLC), solvent was evaporated under reduced pressure, and the crude was purified by column chromatography to get a **(3,4-diphenylazetidin-2-one) 3** as a product.

**(d) General Procedure for synthesis of seven membered benzoxazepine derivative 5:**

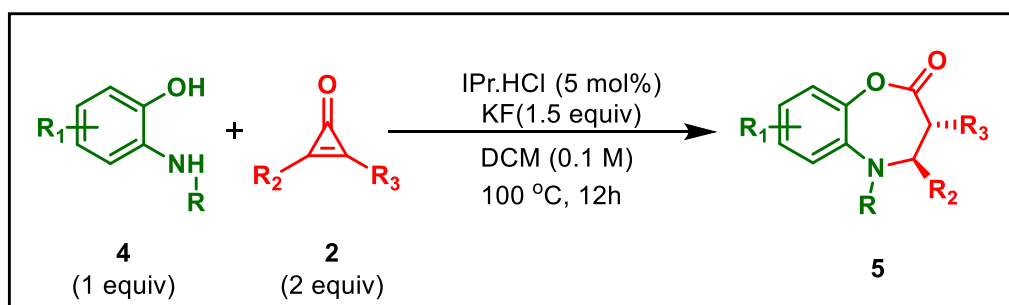

To an oven dried seal tube charged with a stir bar, *o*-aminophenol **4** (0.1 mmol, 1 equiv), diphenylcyclopropanone **2** (0.2 mmol, 2.00 equiv), IPr.HCl (0.005 mmol, 0.05 equiv), were added under nitrogen atmosphere and vacuum was applied. Dichloromethane (1 mL, 0.1 M) was added under nitrogen atmosphere and seal tube was sealed. Potassium fluoride (0.15 mmol, 1.5 equiv) was added inside the glove box and the reaction mixture was stirred (700 rpm) in a preheated aluminium block at **100 °C for 12 h**. After completion of the reaction

(monitored by TLC), the solvent was evaporated under reduced pressure, and the crude was purified by column chromatography using EtOAc/hexane as eluent to get corresponding seven membered benzoxazepine derivative (**4,5-dihydrobenzo[b][1,4] oxazepin-2(3H)-one**) **5** as a product.

**(e) General Procedure for 1 mmol scale synthesis of 2-azetidinone derivatives 3aa:**

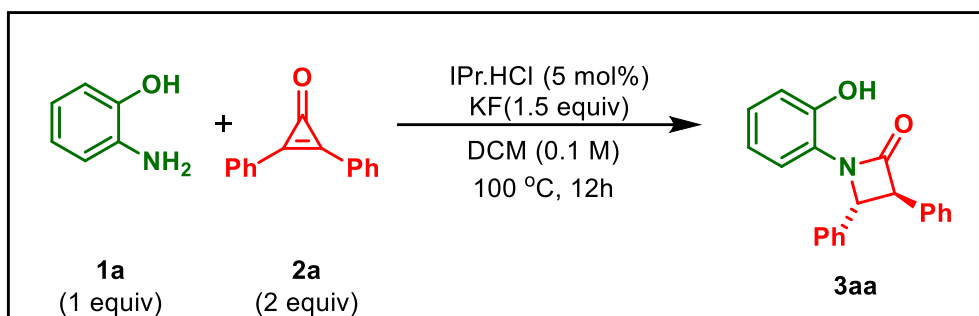

To an oven dried seal tube charged with a stir bar, *o*-aminophenol **1a** (1 mmol, 1 equiv), diphenylcyclopropenone **2a** (2 mmol, 2.0 equiv), ligand (0.05 mmol, 0.05 equiv), were added under nitrogen atmosphere and vacuum was applied. Dichloromethane (1 mL, 0.1 M) was added under nitrogen atmosphere and seal tube was sealed. Potassium fluoride (0.15 mmol, 1.5 equiv) was added inside the glove box and the reaction mixture was stirred (700 rpm) in a preheated aluminium block at **100 °C for 12 h**. After completion of the reaction (monitored by TLC), with the addition of the silica gel in EtOAc to the residue, the solvent was evaporated under reduced pressure, and the crude was purified by column chromatography to get a **3aa** (160 mg, 51%) as a product.

**3. Control and mechanistic experiments:**

**(a) Procedure for reaction without catalyst:**

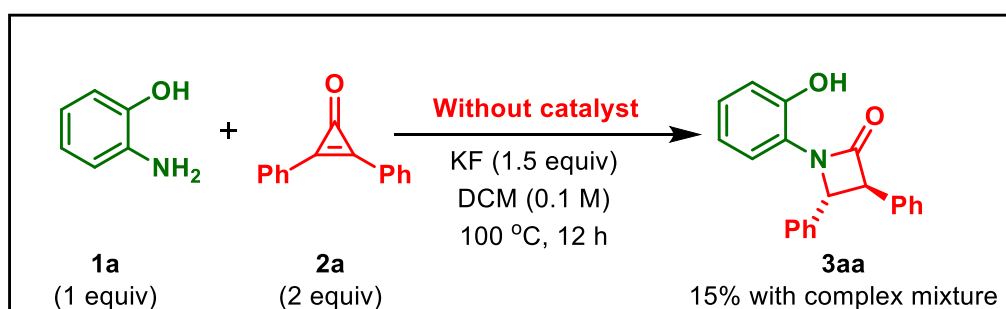

To an oven dried seal tube charged with a stir bar, *o*-aminophenol **1a** (0.1 mmol, 1 equiv), diphenylcyclopropenone **2a** (0.2 mmol, 2.00 equiv), were added under nitrogen atmosphere and vacuum was applied. Dichloromethane (1 mL, 0.1 M) was added under nitrogen atmosphere and seal tube was sealed. Potassium fluoride (0.15 mmol, 1.5 equiv) was added

inside the glove box and the reaction mixture was stirred (700 rpm) in a preheated aluminium block at **100 °C for 12 h**. After completion of the reaction (monitored by TLC), the crude was filtered through short silica bed and washed with EtOAc. The residue was evaporated under reduced pressure. The crude NMR was recorded and 15% of yield of the **3aa** along with complex reaction mixture was observed.

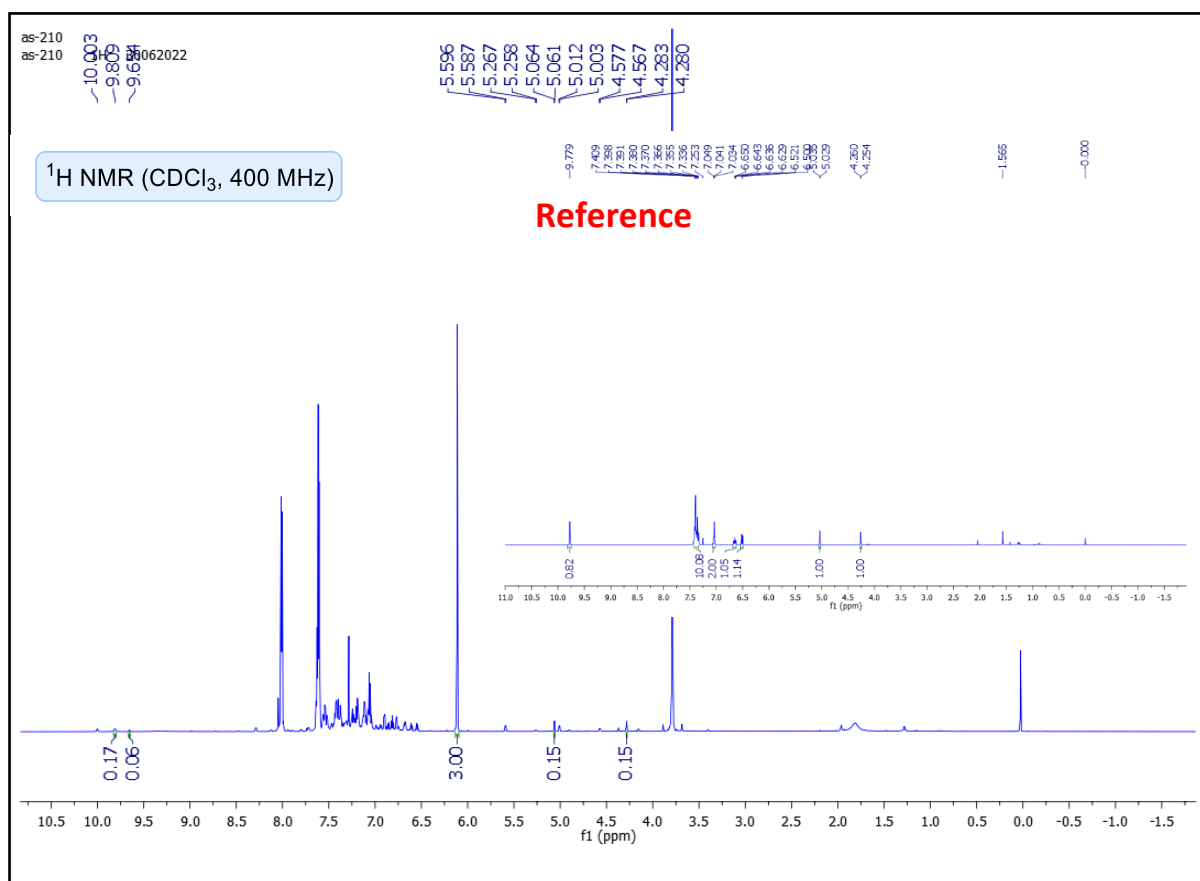

**(b) Procedure for reaction with base and without catalyst for prolonged time:**

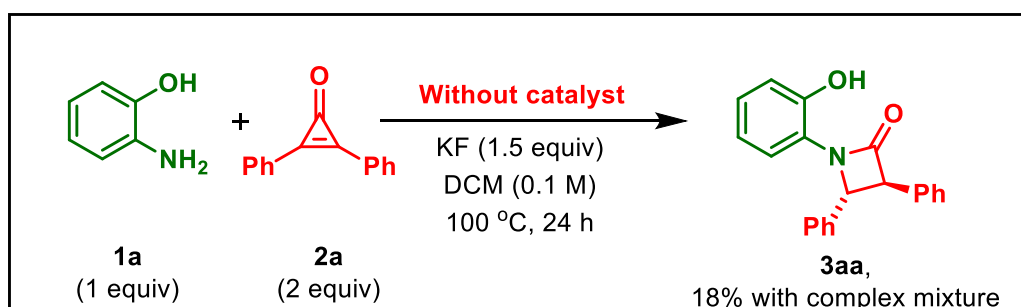

To an oven dried seal tube charged with a stir bar, *o*-aminophenol **1a** (0.1 mmol, 1 equiv), diphenylcyclopropenone **2a** (0.2 mmol, 2.00 equiv), ligand (5 mol%, 0.05 equiv), were added under nitrogen atmosphere and vacuum was applied. Dichloromethane (1 mL, 0.1 M) was added under nitrogen atmosphere and seal tube was sealed. Potassium fluoride (0.15 mmol, 1.5 equiv) was added inside the glove box and the reaction mixture was stirred (700 rpm) in a

preheated aluminium block at **100 °C for 24 h**. After completion of the reaction (monitored by TLC) the crude was filtered through short silica bed and washed with EtOAc. The residue was evaporated under reduced pressure. The crude NMR was recorded. The desired product **3aa** was not observed.

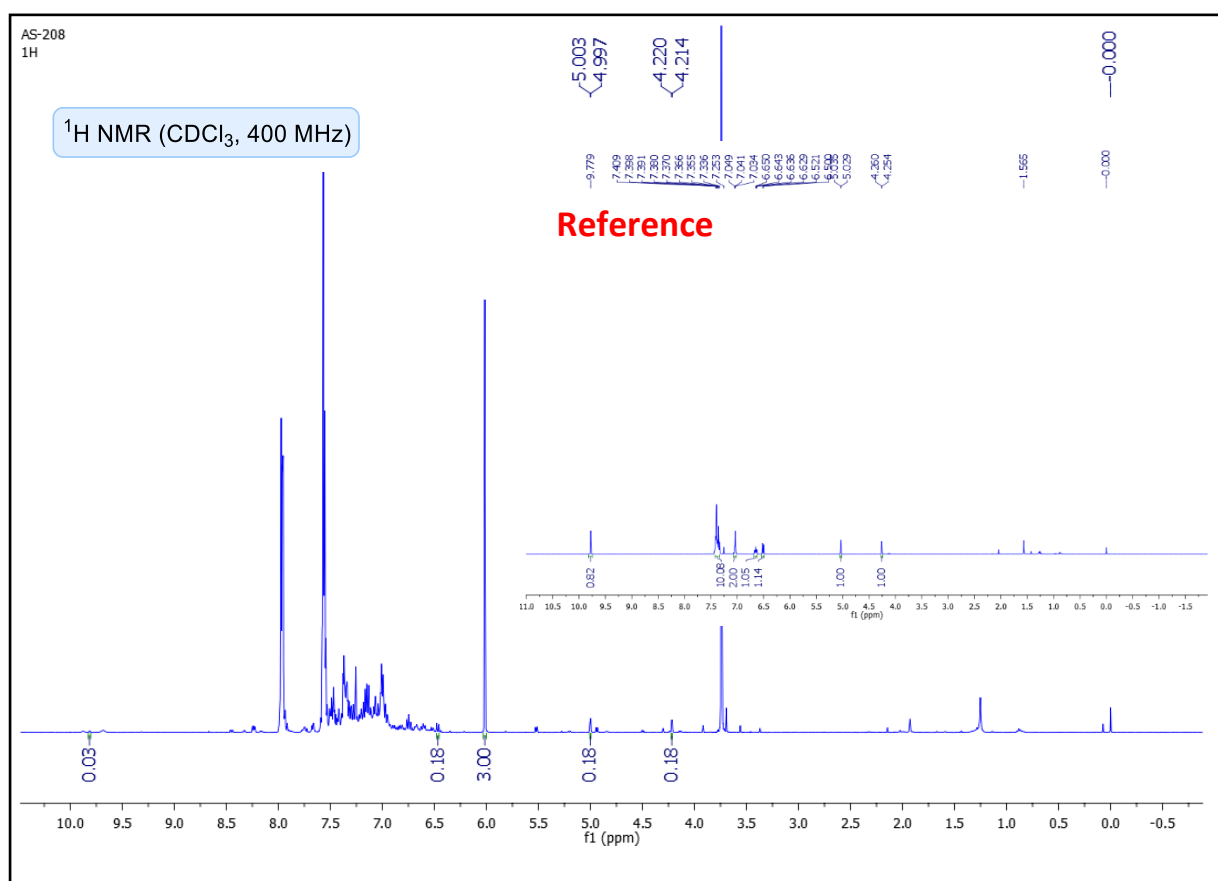

**(c) The role of the hydroxy group:**

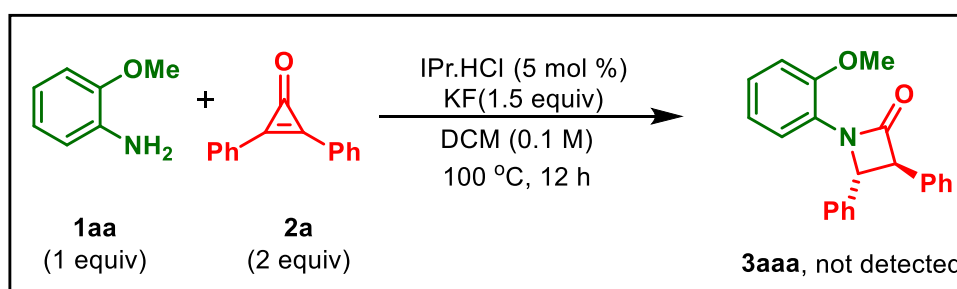

(a) To an oven dried seal tube charged with a stir bar, *o*-amino anisole **1aa** (0.1 mmol, 1 equiv), diphenylcyclopropenone **2a** (0.2 mmol, 2.00 equiv), IPr.HCl (5 mol %, 0.05 equiv), was added under nitrogen atmosphere and vacuum was applied. Dichloromethane (1 mL, 0.1 M) was added under nitrogen atmosphere and seal tube was sealed. Potassium fluoride (0.15 mmol, 1.5 equiv) was added inside the glove box and the reaction mixture was stirred (700 rpm) in a preheated aluminium block at **100 °C for 12 h**. After completion of the reaction (monitored

by TLC), the crude was filtered and residue was evaporated under reduced pressure. The crude NMR was recorded and the product **3aaa** was not detected.

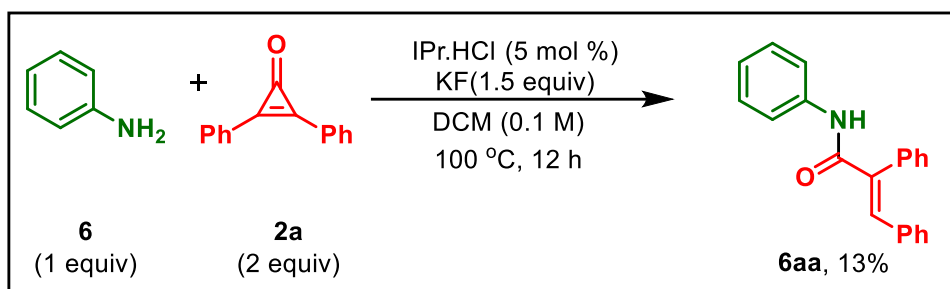

(b) To an oven dried seal tube charged with a stir bar, aniline **6** (0.1 mmol, 1 equiv), diphenylcyclopropenone **2a** (0.2 mmol, 2.00 equiv), IPr·HCl (5 mol%, 0.05 equiv), was added under nitrogen atmosphere and vacuum was applied. Dichloromethane (1 mL, 0.1 M) was added under nitrogen atmosphere. Dichloromethane (1 mL, 0.1 M) was added under nitrogen atmosphere and seal tube was sealed. Potassium fluoride (0.15 mmol, 1.5 equiv) was added inside the glove box and the reaction mixture was stirred (700 rpm) in a preheated aluminium block at **100 °C for 12 h**. After completion of the reaction (monitored by TLC), the crude was filtered and residue was evaporated under reduced pressure. The crude NMR was recorded and the product **6aa** was detected.

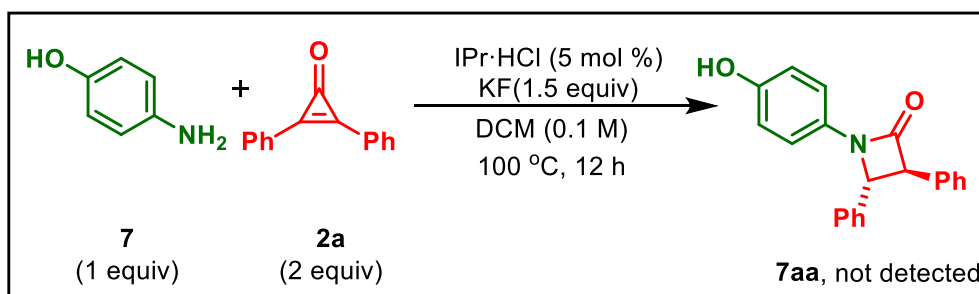

(c) To an oven dried seal tube charged with a stir bar, *p*-hydroxy aniline **7** (0.1 mmol, 1 equiv), diphenylcyclopropenone **2a** (0.2 mmol, 2.00 equiv), IPr·HCl (5 mol%, 0.05 equiv), was added under nitrogen atmosphere and vacuum was applied. Dichloromethane (1 mL, 0.1 M) was added under nitrogen atmosphere. Dichloromethane (1 mL, 0.1 M) was added under nitrogen atmosphere and seal tube was sealed. Potassium fluoride (0.15 mmol, 1.5 equiv) was added inside the glove box and the reaction mixture was stirred (700 rpm) in a preheated aluminium block at **100 °C for 12 h**. After completion of the reaction (monitored by TLC), the crude was filtered and residue was evaporated under reduced pressure. The crude NMR was recorded and the product **7aa** was not detected.



**(d) Reaction to ascertain the intermediacy of  $\beta$ -lactam:**

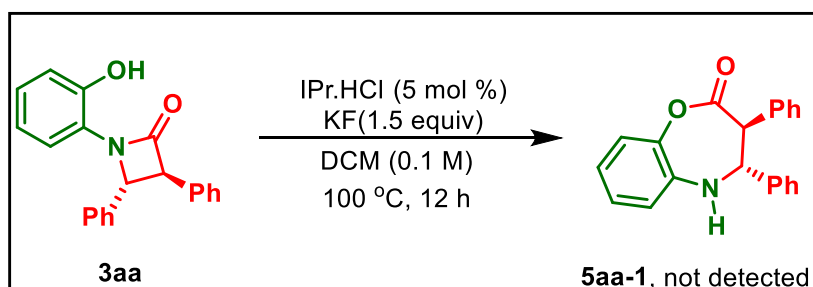

To an oven dried seal tube charged with a stir bar, (3S,4R)-1-(2-hydroxyphenyl)-3,4-diphenylazetid-2-one **3aa** (0.1 mmol, 1 equiv), IPr.HCl (5 mol%, 0.05 equiv), was added under nitrogen atmosphere and vacuum was applied. Dichloromethane (1mL, 0.1 M) was added under nitrogen atmosphere. Dichloromethane (1 mL, 0.1 M) was added under nitrogen atmosphere and seal tube was sealed. Potassium fluoride (0.15 mmol, 1.5 equiv) was added inside the glove box and the reaction mixture was stirred (700 rpm) in a preheated aluminium block at **100 °C for 12 h**. After completion of the reaction (monitored by TLC), the crude was filtered and residue was evaporated under reduced pressure. The crude NMR was recorded and the product **5aa-1** was not detected.

**(e) Reaction to ascertain the intermediacy Acyl azolium:**

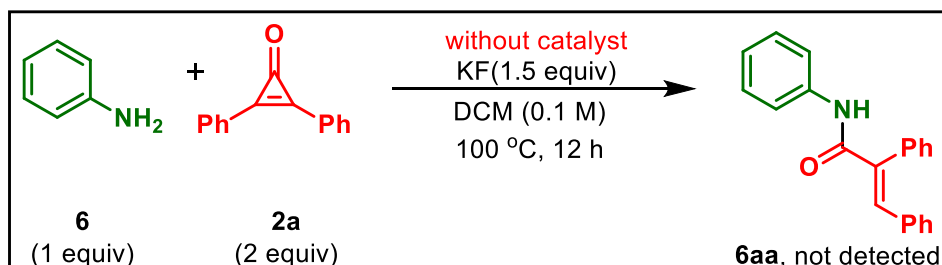

(a) To an oven dried seal tube charged with a stir bar, aniline **6** (0.1 mmol, 1 equiv), diphenylcyclopropenone **2a** (0.2 mmol, 2.00 equiv), was added under nitrogen atmosphere and vacuum was applied. Dichloromethane (1 mL, 0.1 M) was added under nitrogen atmosphere. Dichloromethane (1 mL, 0.1 M) was added under nitrogen atmosphere and seal tube was sealed. Potassium fluoride (0.15 mmol, 1.5 equiv) was added inside the glove box and the reaction mixture was stirred (700 rpm) in a preheated aluminium block at **100 °C for 12 h**. After completion of the reaction (monitored by TLC), the crude was filtered and residue was evaporated under reduced pressure. The crude NMR was recorded and the product **6aa** was not detected.

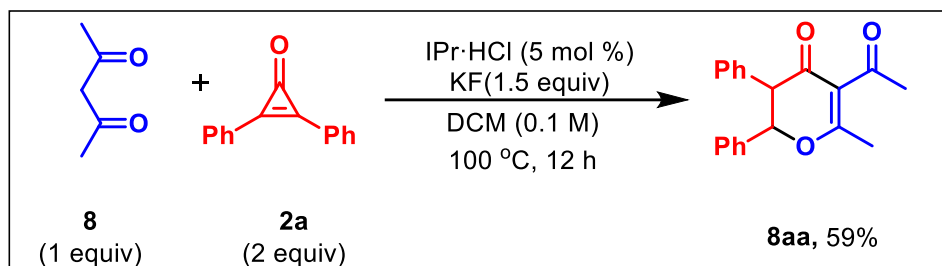

(b) To an oven dried seal tube charged with a stir bar, acetyl acetone **8** (0.1 mmol, 1 equiv), diphenylcyclopropanone **2a** (0.2 mmol, 2.00 equiv), IPr·HCl (5 mol%, 0.05 equiv), was added under nitrogen atmosphere and vacuum was applied. Dichloromethane (1 mL, 0.1 M) was added under nitrogen atmosphere. Dichloromethane (1 mL, 0.1 M) was added under nitrogen atmosphere and seal tube was sealed. Potassium fluoride (0.15 mmol, 1.5 equiv) was added inside the glove box and the reaction mixture was stirred (700 rpm) in a preheated aluminium block at **100 °C for 12 h**. After completion of the reaction (monitored by TLC), with the addition of the silica gel in EtOAc to the residue, the solvent was evaporated under reduced pressure, and the crude was purified by column chromatography to get a **8aa** (18 mg, 59%) as a product.

#### 4. Experimental characterization data for products:

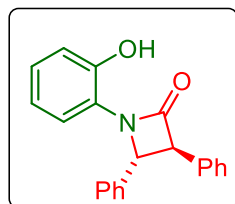

**(3S,4R)-1-(2-hydroxyphenyl)-3,4-diphenylazetidin-2-one (3aa):** was prepared according to general procedure (2c). The crude reaction mixture was purified by column chromatography using silica gel (100-200 mesh size) giving (24 mg) 75% yield.

**Physical State:** colorless liquid.

**R<sub>f</sub>-value:** 0.4 (10% EtOAc/hexane)

**<sup>1</sup>H NMR (400 MHz, CDCl<sub>3</sub>)**  $\delta$  9.77 (s, 1H), 7.43 – 7.33 (m, 10H), 7.04 – 7.03 (m, 2H), 6.67-6.62 (m, 1H), 6.51 (d, *J* = 8.4 Hz, 1H), 5.03 (d, *J* = 2.4 Hz, 1H), 4.25 (d, *J* = 2.4 Hz, 1H).

**<sup>13</sup>C NMR (100 MHz, CDCl<sub>3</sub>)**  $\delta$  167.5, 148.2, 136.5, 134.1, 129.8, 129.5, 129.4, 128.6, 127.7, 127.2, 126.2, 125.4, 120.0, 119.5, 118.2, 64.0, 62.1.

**IR (KBr, cm<sup>-1</sup>):** 3417, 2961, 1712, 1496, 1146.

**HRMS (ESI) m/z:** [M+H]<sup>+</sup> Calcd for C<sub>21</sub>H<sub>18</sub>NO<sub>2</sub>: 316.1338; Found: 316.1353.

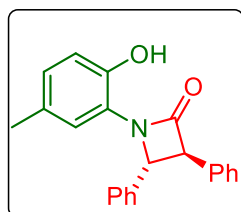

**(3S,4R)-1-(2-hydroxy-5-methylphenyl)-3,4-diphenylazetidin-2-one (3ba):** was prepared according to general procedure (2c). The crude reaction mixture was purified by column chromatography using silica gel (100-200 mesh size) giving (17 mg) 52% yield.

**Physical State:** yellow solid.

**R<sub>f</sub>-value:** 0.4 (10% EtOAc/hexane), **mp:** 163 °C

**<sup>1</sup>H NMR (CDCl<sub>3</sub>, 400 MHz):**  $\delta$  9.44 (s, 1H), 7.41 – 7.33 (m, 10 H), 6.93 (d, *J* = 8.4 Hz, 1H), 6.85 (d, *J* = 8.4 Hz, 1H), 6.32 (s, 1H), 5.03 (d, *J* = 1.6 Hz, 1H), 4.24 (d, *J* = 1.6 Hz, 1H), 2.07 (s, 3H).

**<sup>13</sup>C NMR (CDCl<sub>3</sub>, 175 MHz):**  $\delta$  167.5, 146.0, 136.7, 134.2, 129.7, 129.5, 129.3, 128.6 (2C), 127.9, 127.7, 126.2, 125.1, 119.3, 118.6, 63.9, 62.2, 20.7.

**IR (KBr, cm<sup>-1</sup>):** 3439, 1710, 1640.

**HRMS (ESI) m/z:** [M+H]<sup>+</sup> Calcd for C<sub>22</sub>H<sub>20</sub>NO<sub>2</sub>: 330.1494; Found: 330.1509.

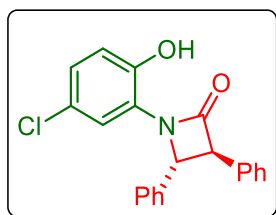

**(3S,4R)-1-(5-chloro-2-hydroxyphenyl)-3,4-diphenylazetidin-2-one (3ca):** was prepared according to general procedure (2c). The crude reaction mixture was purified by column chromatography using silica gel (100-200 mesh size) giving (19 mg) 54% yield.

**Physical State:** brown solid.

**R<sub>f</sub>-value:** 0.4 (10% EtOAc/hexane), **mp:** 120 °C

**<sup>1</sup>H NMR (CDCl<sub>3</sub>, 400 MHz):** δ 9.70 (s, 1H), 7.44-7.36 (m, 8H), 7.33 (d, *J* = 7.0 Hz, 2H), 6.99 (dd, *J* = 7.0 Hz, 2.1 Hz, 1H), 6.95 (d, *J* = 9.1 Hz, 1H), 6.47 (d, *J* = 2.1 Hz, 1H), 5.01 (d, *J* = 2.1 Hz, 1H), 4.27 (d, *J* = 2.1 Hz, 1H).

**<sup>13</sup>C NMR (CDCl<sub>3</sub>, 175 MHz):** δ 167.8, 147.0, 135.9, 133.8, 129.9 (2C), 129.6, 128.7, 127.6, 127.0, 126.4, 126.2, 124.8, 120.6, 118.0, 64.1, 62.3.

**IR (KBr, cm<sup>-1</sup>):** 3443, 2920, 1712, 1692, 1494.

**HRMS (ESI) m/z:** [M+H]<sup>+</sup> Calcd for C<sub>21</sub>H<sub>17</sub>NO<sub>2</sub>Cl: 350.0948; Found: 350.0963.

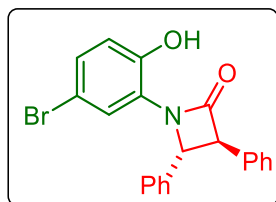

**(3S,4R)-1-(5-bromo-2-hydroxyphenyl)-3,4-diphenylazetidin-2-one (3da):** was prepared according to general procedure (2c). The crude reaction mixture was purified by column chromatography using silica gel (100-200 mesh size) giving (26 mg) 66% yield.

**Physical State:** Orange solid

**R<sub>f</sub>-value:** 0.4 (10% EtOAc/hexane), **mp:** 140 °C

**<sup>1</sup>H NMR (CDCl<sub>3</sub>, 700 MHz):** δ 9.72 (s, 1H), 7.45-7.36 (m, 8H), 7.33 (d, *J* = 7.0 Hz, 2H), 7.26 (dd, *J* = 8.4 Hz, 2.1 Hz, 1H), 6.90 (d, *J* = 9.1 Hz, 1H), 6.61 (d, *J* = 2.1 Hz, 1H), 5.02 (d, *J* = 2.1 Hz, 1H), 4.28 (d, *J* = 2.1 Hz, 1H).

**<sup>13</sup>C NMR (CDCl<sub>3</sub>, 175 MHz):** δ 167.9, 147.6, 135.9, 133.7, 130.0, 129.9, 129.6 (2C), 128.7, 127.6, 126.8, 126.2, 121.1, 120.9, 111.7, 64.1, 62.3.

**IR (KBr, cm<sup>-1</sup>):** 3442, 1712, 1632, 1493, 1146.

**HRMS (ESI) m/z:** [M+H]<sup>+</sup> Calcd for C<sub>21</sub>H<sub>17</sub>NO<sub>2</sub>Br: 394.0443; Found: 394.0456.

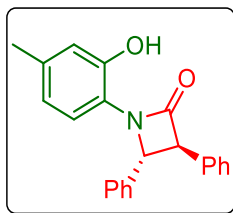

**(3S,4R)-1-(2-hydroxy-4-methylphenyl)-3,4-diphenylazetidin-2-one (3ea):** was prepared according to general procedure (2c). The crude reaction mixture was purified by column chromatography using silica gel (100-200 mesh size) giving (18 mg) 55% yield.

**Physical State:** yellow solid.

**R<sub>f</sub>-value:** 0.3 (10% EtOAc/hexane), **mp:** 215 °C

**<sup>1</sup>H NMR (CDCl<sub>3</sub>, 400 MHz):** δ 9.75 (s, 1H), 7.42 – 7.33 (m, 10 H), 6.85 (s, 1H), 6.45 (d, *J* = 8.0 Hz, 1H), 6.38 (d, *J* = 8.0 Hz, 1H), 5.00 (d, *J* = 1.6 Hz, 1H), 4.23 (d, *J* = 1.2 Hz, 1H), 2.23 (s, 3H).

**<sup>13</sup>C NMR (CDCl<sub>3</sub>, 175 MHz):** δ 167.1, 148.0, 137.5, 136.7, 134.3, 129.7, 129.5, 129.3, 128.6, 127.7, 126.2, 123.0, 120.7, 119.9, 64.0, 62.1, 21.1.

**IR (KBr, cm<sup>-1</sup>):** 3450, 1703, 1657.

**HRMS (ESI) m/z:** [M+H]<sup>+</sup> Calcd for C<sub>22</sub>H<sub>20</sub>NO<sub>2</sub>: 330.1494; Found: 330.1524.

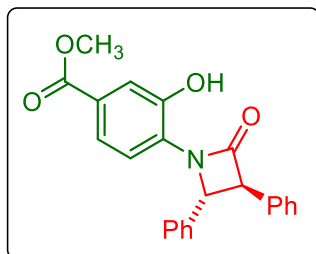

**(Methyl 3-hydroxy-4-((3S,4R)-2-oxo-3,4-diphenylazetidin-1-yl)benzoate) (3fa):** was prepared according to general procedure (2c). The crude reaction mixture was purified by column chromatography using silica gel (100-200 mesh size) giving (14 mg) 38% yield.

**Physical State:** colorless liquid

**R<sub>f</sub>-value:** 0.3 (10% EtOAc/hexane)

**<sup>1</sup>H NMR (CDCl<sub>3</sub>, 700 MHz):** δ 9.90 (s, 1H), 7.68 (d, *J* = 1.6 Hz, 1H), 7.42 – 7.32 (m, 11H), 6.52 (d, *J* = 8.0 Hz, 1H), 5.07 (d, *J* = 2.4 Hz, 1H), 4.30 (d, *J* = 2.4 Hz, 1H), 3.85 (s, 3H).

**<sup>13</sup>C NMR (CDCl<sub>3</sub>, 175 MHz):** δ 168.0, 166.6, 148.0, 136.1, 133.7, 129.9 (2C), 129.6, 129.2, 128.8 (2C), 127.6, 126.2, 121.7, 120.7, 117.9, 64.2, 62.2, 52.4.

**IR (KBr, cm<sup>-1</sup>):** 3448, 2923, 1711, 1653, 1456, 1223.

**HRMS (ESI) m/z:** [M+Na]<sup>+</sup> Calcd for C<sub>23</sub>H<sub>19</sub>NO<sub>4</sub>Na: 396.1212; Found: 396.1190.

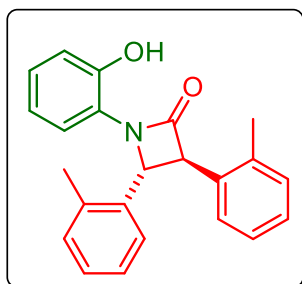

**(3S,4R)-1-(2-hydroxyphenyl)-3,4-di-o-tolylazetidin-2-one**

**(3ac):** was prepared according to general procedure (2c). The crude reaction mixture was purified by column chromatography using silica gel (100-200 mesh size) giving (19 mg) 55% yield.

**Physical State:** yellow solid

**R<sub>f</sub>-value:** 0.3 (10% EtOAc/hexane), **mp:** 141 °C

**<sup>1</sup>H NMR (CDCl<sub>3</sub>, 400 MHz):** δ. 9.84 (s, 1H), 7.41 – 7.39 (m, 1H), 7.30 (d, *J* = 7.7 Hz, 2H), 7.25 – 7.23 (m, 2H), 7.20 (d, *J* = 7.7 Hz, 3H), 7.04 – 7.01 (m, 2H), 6.64 – 6.62 (m, 1H), 6.49 (d, *J* = 7.7 Hz, 1H), 4.87 (d, *J* = 2.8 Hz, 1H), 4.44 (d, *J* = 2.1 Hz, 1H), 2.35 (s, 3H), 2.12 (s, 3H).

**<sup>13</sup>C NMR (CDCl<sub>3</sub>, 175 MHz):** δ 168.0, 148.4, 139.4, 137.0, 133.8, 133.1, 131.0, 130.4, 128.5, 127.2, 127.0 (2C), 126.9, 126.4, 125.5, 120.0, 119.4 (2C), 118.2, 63.9, 60.1, 21.5, 20.2.

**IR (KBr, cm<sup>-1</sup>):** 3443, 1634.

**HRMS (ESI) m/z:** [M+H]<sup>+</sup> Calcd for C<sub>23</sub>H<sub>22</sub>NO<sub>2</sub>: 344.1651; Found: 344.1666.

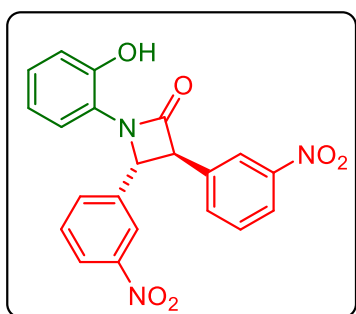

**(3S,4R)-1-(2-hydroxyphenyl)-3,4-bis(3-nitrophenyl)azetidin-2-one**

**(3af):** was prepared according to general procedure (2c). The crude reaction mixture was purified by column chromatography using silica gel (100-200 mesh size) giving (20 mg) 50% yield.

**Physical State:** yellow solid

**R<sub>f</sub>-value:** 0.6 (30% EtOAc/hexane), **mp:** 90 °C

**<sup>1</sup>H NMR (CDCl<sub>3</sub>, 700 MHz):** δ. 9.18 (s, 1H), 8.28 – 8.26 (m, 3H), 8.22 (t, *J* = 2.1 Hz, 1H), 7.76 – 7.72 (m, 2H), 7.67-7.64 (m, 2H), 7.11 (dt, *J* = 8.4 Hz, 1.4 Hz, 1H), 7.07 (dd, *J* = 8.4 Hz, 1.4 Hz, 1H), 6.72-6.70 (m, 1H), 6.51 (dd, *J* = 7.7 Hz, 1.4 Hz, 1H), 5.23 (d, *J* = 2.1 Hz, 1H), 4.41 (d, *J* = 2.8 Hz, 1H).

**<sup>13</sup>C NMR (CDCl<sub>3</sub>, 175 MHz):** δ 165.3, 149.3, 148.3, 138.2, 135.2, 133.7, 131.8, 131.4, 130.9, 128.1 (2C), 124.8, 124.5, 124.1, 122.9, 121.8, 120.5, 120.0, 118.1, 62.6, 61.5.

**IR (KBr, cm<sup>-1</sup>):** 3087, 1717.

**HRMS (ESI) m/z:** [M+Na]<sup>+</sup> Calcd for C<sub>21</sub>H<sub>15</sub>N<sub>3</sub>O<sub>6</sub>Na: 428.0858; Found: 428.0878.

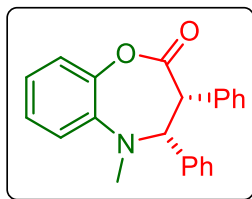

**(3R,4R)-5-methyl-3,4-diphenyl-4,5-dihydrobenzo[b][1,4]oxazepin-2(3H)-one (5ea')**: was prepared according to general procedure (2d). The crude reaction mixture was purified by column chromatography using silica gel (100-200 mesh size) giving (13 mg) 40% yield.

**Physical State:** brown solid

**R<sub>f</sub>-value:** 0.6 (10% EtOAc/hexane), **mp:** 202 °C

**<sup>1</sup>H NMR (CDCl<sub>3</sub>, 400 MHz):** δ 7.34 – 7.26 (m, 4H), 7.25 – 7.16 (m, 3H), 7.14 – 7.06 (m, 5H), 6.85 (d, *J* = 8.0 Hz, 2H), 4.49 (d, *J* = 6.0 Hz, 1H), 4.20 (d, *J* = 6.0 Hz, 1H), 2.62 (s, 3H).

**<sup>13</sup>C NMR (CDCl<sub>3</sub>, 175 MHz):** δ 168.4, 146.5, 141.2, 137.3, 133.7, 131.0, 129.3, 128.9, 128.3, 127.9, 127.8, 126.9, 123.6, 120.4, 120.3, 78.8, 50.7, 39.1.

**IR (KBr, cm<sup>-1</sup>):** 3447, 2962, 1764, 1494, 1127

**HRMS (ESI) m/z:** [M+H]<sup>+</sup> Calcd for C<sub>22</sub>H<sub>20</sub>NO<sub>2</sub>: 330.1494; Found: 330.1483.

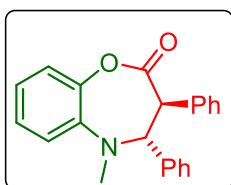

**(3S,4R)-5-methyl-3,4-diphenyl-4,5-dihydrobenzo[b][1,4]oxazepin-2(3H)-one (5ea)**: was prepared according to general procedure (2d). The crude reaction mixture was purified by column chromatography using silica gel (100-200 mesh size) giving (15 mg) 46% yield.

**Physical State:** colorless liquid

**R<sub>f</sub>-value:** 0.5 (10% EtOAc/hexane)

**<sup>1</sup>H NMR (CDCl<sub>3</sub>, 400 MHz):** δ 7.22-7.11 (m, 11H), 6.90 (d, *J* = 8.0 Hz, 1H), 6.80 (d, *J* = 7.2 Hz, 2H), 4.80 (d, *J* = 11.6 Hz, 1H), 4.26 (d, *J* = 11.6 Hz, 1H), 2.60 (s, 3H).

**<sup>13</sup>C NMR (CDCl<sub>3</sub>, 175 MHz):** δ 170.3, 147.0, 138.1, 136.4, 134.5, 130.1, 128.5, 128.4 (2C), 127.9, 127.8, 126.1, 124.6, 123.2, 119.8, 77.1, 54.1, 39.2.

**IR (KBr, cm<sup>-1</sup>):** 3438, 1762, 1492, 1133.

**HRMS (ESI) m/z:** [M+H]<sup>+</sup> Calcd for C<sub>22</sub>H<sub>20</sub>NO<sub>2</sub>: 330.1494; Found: 330.1505.

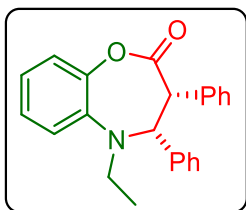

**(3R,4R)-5-ethyl-3,4-diphenyl-4,5-**

**dihydrobenzo[b][1,4]oxazepin-2(3H)-one (5fa')**: was prepared according to general procedure (2d). The crude reaction mixture was purified by column chromatography using silica gel (100-200 mesh size) giving (13 mg) 38% yield.

**Physical State:** yellow solid

**R<sub>f</sub>-value:** 0.5 (10% EtOAc/hexane), **mp:** 132 °C

**<sup>1</sup>H NMR (CDCl<sub>3</sub>, 700 MHz):** δ 7.35-7.38 (m, 3H), 7.20-7.06 (m, 9H), 6.85 (d, *J* = 7.6 Hz, 2H), 4.47 (d, *J* = 5.6 Hz, 1H), 4.38 (d, *J* = 6.0 Hz, 1H), 3.20-3.11 (m, 1H), 2.98-2.91 (m, 1H), 0.97 (t, *J* = 7.2 Hz, 3H).

**<sup>13</sup>C NMR (CDCl<sub>3</sub>, 175 MHz):** δ 168.6, 147.5, 138.5, 137.6, 133.8, 131.1, 129.4, 128.8, 128.3, 127.9, 127.7, 126.6, 123.5, 121.2, 120.7, 77.5, 50.6, 43.4, 12.7.

**IR (KBr, cm<sup>-1</sup>):** 3447, 2923, 1766, 1494, 1124.

**HRMS (ESI) m/z:** [M+H]<sup>+</sup> Calcd for C<sub>23</sub>H<sub>22</sub>NO<sub>2</sub>: 344.1651; Found: 344.1635.

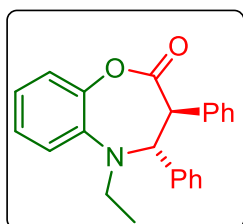

**(3S,4R)-5-ethyl-3,4-diphenyl-4,5-dihydrobenzo[b][1,4]oxazepin-2(3H)-one (5fa)**: was prepared according to general procedure (2d).

The crude reaction mixture was purified by column chromatography using silica gel (100-200 mesh size) giving (17 mg) 50% yield.

**Physical State:** colorless liquid

**R<sub>f</sub>-value:** 0.6 (10% EtOAc/hexane)

**<sup>1</sup>H NMR (CDCl<sub>3</sub>, 400 MHz):** δ 7.25-7.24 (m, 1H), 7.22-7.19 (m, 4H), 7.16-7.09 (m, 6H), 6.89-6.87 (m, 1H), 6.80 (d, *J* = 7.0 Hz, 2H), 4.91 (d, *J* = 11.9 Hz, 1H), 4.25 (d, *J* = 11.2 Hz, 1H), 2.95-2.88 (m, 1H), 2.87-2.82 (m, 1H), 1.11 (t, *J* = 7.0 Hz, 3H).

**<sup>13</sup>C NMR (CDCl<sub>3</sub>, 175 MHz):** δ 170.5, 148.0, 136.8, 136.5, 134.6, 130.1, 128.4 (2C), 128.3, 127.9 (2C), 125.8, 124.8, 124.6, 119.9, 75.2, 54.1, 45.1, 13.1.

**IR (KBr, cm<sup>-1</sup>):** 3439, 1765, 1491, 1158.

**HRMS (ESI) m/z:** [M+H]<sup>+</sup> Calcd for C<sub>23</sub>H<sub>22</sub>NO<sub>2</sub>: 344.1651; Found: 344.1673.



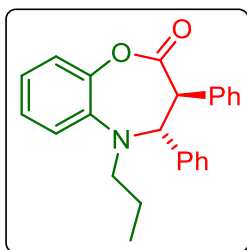

**(3S,4R)-3,4-diphenyl-5-propyl-4,5-dihydrobenzo[b][1,4]oxazepin-2(3H)-one (5ga):** was prepared according to general procedure (2d). The crude reaction mixture was purified by column chromatography using silica gel (100-200 mesh size) giving (15 mg) 42% yield.

**Physical State:** yellow liquid

**R<sub>f</sub>-value:** 0.5 (10% EtOAc/hexane)

**<sup>1</sup>H NMR (CDCl<sub>3</sub>, 700 MHz):**  $\delta$  7.24 (d,  $J$  = 2.1 Hz, 1H), 7.21-7.18 (m, 4H), 7.16 -7.10 (m, 6H), 6.90 (d,  $J$  = 7.7 Hz, 1H), 6.80 (d,  $J$  = 7.0 Hz, 2H) 4.86 (d,  $J$  = 11.2 Hz, 1H), 4.26 (d,  $J$  = 11.2 Hz, 1H), 2.88-2.84 (m, 1H), 2.77-2.73(m, 1H), 1.54-1.48 (m, 2H), 0.87 (t,  $J$  = 7.0 Hz, 3H).

**<sup>13</sup>C NMR (CDCl<sub>3</sub>, 175 MHz):**  $\delta$  170.5, 148.0, 136.8, 136.6, 134.6, 130.1, 128.4 (2C), 128.3, 127.9 (2C), 125.8, 124.8, 124.6, 119.9, 75.4, 54.1, 52.5, 20.5, 11.7.

**IR (KBr, cm<sup>-1</sup>):** 3447, 2961, 1767, 1492, 1123.

**HRMS (ESI) m/z:** [M+H]<sup>+</sup> Calcd for C<sub>24</sub>H<sub>24</sub>NO<sub>2</sub>: 358.1807; Found: 358.1801.

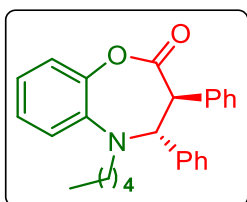

**(3S,4R)-5-pentyl-3,4-diphenyl-4,5-dihydrobenzo[b][1,4]oxazepin-2(3H)-one (5ha):** was prepared according to general procedure (2d). The crude reaction mixture was purified by column chromatography using silica gel (100-200 mesh size) giving (28 mg) 73% yield.

**Physical State:** brown liquid

**R<sub>f</sub>-value:** 0.5 (10% EtOAc/hexane)

**<sup>1</sup>H NMR (CDCl<sub>3</sub>, 400 MHz):**  $\delta$  7.24-7.23 (m, 1H), 7.21 – 7.09 (m, 10H), 6.91-6.88 (m, 1H), 6.80 (d,  $J$  = 6.4 Hz, 2H), 4.86 (d,  $J$  = 11.6 Hz, 1H), 4.25 (d,  $J$  = 11.6 Hz, 1H), 2.90-2.83 (m, 1H), 2.80-2.73 (m, 1H), 1.52-1.46 (m, 2H), 1.27-1.25 (m, 4H), 0.85 (t,  $J$  = 6.8 Hz, 3H).

**<sup>13</sup>C NMR (CDCl<sub>3</sub>, 175 MHz):**  $\delta$  170.4, 148.0, 136.9, 136.5, 134.6, 130.1, 128.4 (2C), 128.3, 127.9 (2C), 125.8, 124.8, 124.6, 119.9, 75.4, 54.1, 50.7, 29.3, 26.9, 22.6, 14.3.

**IR (KBr, cm<sup>-1</sup>):** 3437, 2953, 1765, 1491, 1126.

**HRMS (ESI) m/z:** [M+H]<sup>+</sup> Calcd for C<sub>26</sub>H<sub>28</sub>NO<sub>2</sub>: 386.2120; Found: 386.2092.

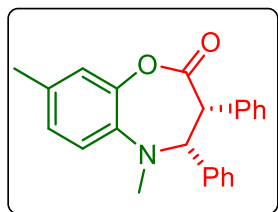

**(3R,4R)-5,8-dimethyl-3,4-diphenyl-4,5-dihydrobenzo[b][1,4]oxazepin-2(3H)-one (5ia')**: was prepared according to general procedure (2d). The crude reaction mixture was purified by column chromatography using silica gel (100-200 mesh size) giving (26 mg) 76% yield.

**Physical State:** white solid

**R<sub>f</sub>-value:** 0.4 (10% EtOAc/hexane), **mp:** 160 °C

**<sup>1</sup>H NMR (CDCl<sub>3</sub>, 700 MHz):** δ 7.32 (t, *J* = 7.0 Hz, 1H), 7.26-7.24 (m, 2H), 7.14 (t, *J* = 7.0 Hz, 1H), 7.11-7.05 (m, 6H), 6.99 (s, 1H), 6.84 (d, *J* = 7.7 Hz, 2H), 4.46 (d, *J* = 6.3 Hz, 1H), 4.15 (d, *J* = 6.3 Hz, 1H), 2.58 (s, 3H), 2.37 (s, 3H).

**<sup>13</sup>C NMR (CDCl<sub>3</sub>, 175 MHz):** δ 168.7, 146.3, 138.6, 137.4, 133.8 (2C), 131.0, 129.3, 128.8, 128.3, 127.8, 127.7, 127.2, 120.7, 120.1, 79.1, 50.8, 39.2, 20.9.

**IR (KBr, cm<sup>-1</sup>):** 3448, 2960, 1764, 1509, 1124.

**HRMS (ESI) m/z:** [M+H]<sup>+</sup> Calcd for C<sub>23</sub>H<sub>22</sub>NO<sub>2</sub>: 344.1651; Found: 344.1639.

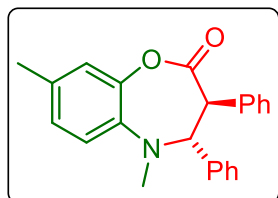

**(3S,4R)-5,8-dimethyl-3,4-diphenyl-4,5-dihydrobenzo[b][1,4]oxazepin-2(3H)-one (5ia)**: was prepared according to general procedure (2d). The crude reaction mixture was purified by column chromatography using silica gel (100-200 mesh size) giving (4 mg) 12% yield.

**Physical State:** orange liquid.

**R<sub>f</sub>-value:** 0.3 (10% EtOAc/hexane)

**<sup>1</sup>H NMR (CDCl<sub>3</sub>, 700 MHz):** δ 7.20 (d, *J* = 7.7 Hz, 2H), 7.16-7.10 (m, 6H), 7.04 (s, 1H), 7.01 (d, *J* = 7.7 Hz, 1H), 6.81 (d, *J* = 7.7 Hz, 2H), 6.76 (d, *J* = 7.7 Hz, 1H), 4.76 (d, *J* = 11.2 Hz, 1H), 4.25 (d, *J* = 11.2 Hz, 1H), 2.57 (s, 3H), 2.40 (s, 3H).

**<sup>13</sup>C NMR (CDCl<sub>3</sub>, 175 MHz):** δ 170.6, 146.7, 136.4, 135.3, 134.7 (2C), 130.1, 128.4 (3C), 127.9 (2C), 126.6, 122.9, 120.2, 77.2, 54.2, 39.2, 21.1.

**IR (KBr, cm<sup>-1</sup>):** 3438, 1761, 1633.

**HRMS (ESI) m/z:** [M+H]<sup>+</sup> Calcd for C<sub>23</sub>H<sub>22</sub>NO<sub>2</sub>: 344.1651; Found: 344.1662.

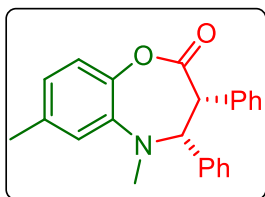

**(3R,4R)-5,7-dimethyl-3,4-diphenyl-4,5-dihydrobenzo[b][1,4]oxazepin-2(3H)-one (5ja')**: was prepared according to general procedure (2d). The crude reaction mixture was purified by column chromatography using silica gel (100-200 mesh size) giving (21 mg) 61% yield.

**Physical State:** white solid

**R<sub>f</sub>-value:** 0.5 (10% EtOAc/hexane), **mp:** 208 °C

**<sup>1</sup>H NMR (CDCl<sub>3</sub>, 700 MHz):** δ 7.32 (t, *J* = 7.0 Hz, 1H), 7.27-7.24 (m, 2H), 7.15 (t, *J* = 7.7 Hz, 1H), 7.09-7.05 (m, 5H), 7.01 (s, 1H), 6.90 (d, *J* = 7.7 Hz, 1H), 6.85 (d, *J* = 7.7 Hz, 2H), 4.49 (d, *J* = 5.6 Hz, 1H), 4.17 (d, *J* = 5.6 Hz, 1H), 2.60 (s, 3H), 2.41 (s, 3H).

**<sup>13</sup>C NMR (CDCl<sub>3</sub>, 175 MHz):** δ 168.7, 144.2, 140.8, 137.4, 136.6, 133.8, 131.0, 129.3, 128.9, 128.3, 127.9, 127.7, 123.9, 120.9, 120.0, 78.8, 50.6, 39.1, 21.6.

**IR (KBr, cm<sup>-1</sup>):** 3438, 2959, 1764, 1502, 1127.

**HRMS (ESI) m/z:** [M+H]<sup>+</sup> Calcd for C<sub>23</sub>H<sub>22</sub>NO<sub>2</sub>: 344.1651; Found: 344.1656.

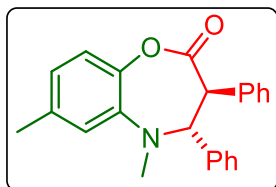

**(3S,4R)-5,7-dimethyl-3,4-diphenyl-4,5-dihydrobenzo[b][1,4]oxazepin-2(3H)-one (5ja)**: was prepared according to general procedure (2d). The crude reaction mixture was purified by column chromatography using silica gel (100-200 mesh size) giving (7 mg) 20% yield.

**Physical State:** colorless liquid

**R<sub>f</sub>-value:** 0.4 (10% EtOAc/hexane)

**<sup>1</sup>H NMR (CDCl<sub>3</sub>, 700 MHz):** δ 7.18 (d, *J* = 7.7 Hz, 2H), 7.16-7.13 (m, 7H), 6.97 (d, *J* = 8.4 Hz, 1H), 6.81 (d, *J* = 7.0 Hz, 2H), 6.67 (s, 1H), 4.78 (d, *J* = 11.9 Hz, 1H), 4.26 (d, *J* = 11.2 Hz, 1H), 2.58 (s, 3H), 2.35 (s, 3H).

**<sup>13</sup>C NMR (CDCl<sub>3</sub>, 175 MHz):** δ 170.6, 144.7, 137.8, 136.6, 135.9, 134.6, 130.1, 128.4 (2C), 128.3, 127.9, 127.8, 125.0, 123.6, 119.4, 77.0, 54.1, 39.2, 21.5, 6.3.

**IR (KBr, cm<sup>-1</sup>):** 3443, 2923, 1763, 1498, 1132.

**HRMS (ESI) m/z:** [M+H]<sup>+</sup> Calcd for C<sub>23</sub>H<sub>22</sub>NO<sub>2</sub>: 344.1651; Found: 344.1649.

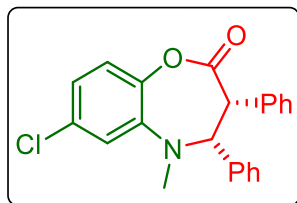

**(3R,4R)-7-chloro-5-methyl-3,4-diphenyl-4,5-dihydrobenzo[b][1,4]oxazepin-2(3H)-one (5ka')**: was prepared according to general procedure (2d). The crude reaction mixture was purified by column chromatography using silica gel (100-200 mesh size) giving (8 mg) 22% yield.

**Physical State:** orange liquid

**R<sub>f</sub>-value:** 0.6 (10% EtOAc/hexane)

**<sup>1</sup>H NMR (CDCl<sub>3</sub>, 400 MHz):** δ 7.36-7.33 (m, 1H), 7.28 (d, *J* = 8.0 Hz, 1H), 7.18-7.16 (m, 2H), 7.12-7.06 (m, 7H), 6.87-6.85 (m, 2H), 4.47 (d, *J* = 5.6 Hz, 1H), 4.21 (d, *J* = 6.0 Hz, 1H), 2.61 (s, 3H).

**<sup>13</sup>C NMR (CDCl<sub>3</sub>, 175 MHz):** δ 167.8, 144.8, 142.2, 136.8, 133.3, 132.0, 131.0, 129.3, 129.1, 128.4, 128.1, 127.9, 123.1, 121.4, 120.6, 78.4, 50.5, 39.1.

**IR (KBr, cm<sup>-1</sup>):** 3438, 1770, 1633, 1491, 1122.

**HRMS (ESI) m/z:** [M+H]<sup>+</sup> Calcd for C<sub>22</sub>H<sub>19</sub>NO<sub>2</sub>Cl: 364.1104; Found: 364.1114.

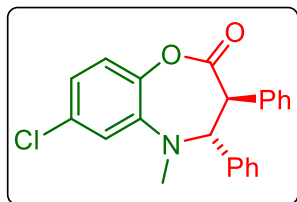

**(3S,4R)-7-chloro-5-methyl-3,4-diphenyl-4,5-dihydrobenzo[b][1,4]oxazepin-2(3H)-one (5ka)**: was prepared according to general procedure (2d). The crude reaction mixture was purified by column chromatography using silica gel (100-200 mesh size) giving (10 mg) 27% yield.

**Physical State:** colorless liquid

**R<sub>f</sub>-value:** 0.5 (10% EtOAc/hexane)

**<sup>1</sup>H NMR (CDCl<sub>3</sub>, 400 MHz):** δ 7.19-7.13 (m, 10H), 6.85 (d, *J* = 2.1 Hz, 1H), 6.81 (d, *J* = 6.3 Hz, 2H), 4.79 (d, *J* = 11.9 Hz, 1H), 4.24 (d, *J* = 11.9 Hz, 1H), 2.58 (s, 3H).

**<sup>13</sup>C NMR (CDCl<sub>3</sub>, 175 MHz):** δ 169.7, 145.5, 139.4, 136.1, 134.1, 131.3, 130.0, 128.7 (2C), 128.5, 128.1, 127.6, 124.4, 123.2, 120.8, 77.0, 53.9, 39.3.

**IR (KBr, cm<sup>-1</sup>):** 3438, 2922, 1767, 1635, 1488, 1128.

**HRMS (ESI) m/z:** [M+H]<sup>+</sup> Calcd for C<sub>22</sub>H<sub>19</sub>NO<sub>2</sub>Cl: 364.1104; Found: 364.1120.

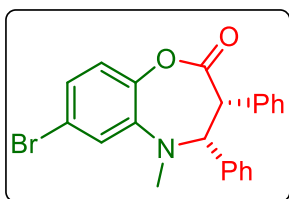

**(3R,4R)-7-bromo-5-methyl-3,4-diphenyl-4,5-dihydrobenzo[b][1,4]oxazepin-2(3H)-one (5la')**:

was prepared according to general procedure (2d). The crude reaction mixture was purified by column chromatography using silica gel (100-200 mesh size) giving (14 mg) 34% yield.

**Physical State:** white solid.

**R<sub>f</sub>-value:** 0.6 (10% EtOAc/hexane), **mp:** 235 °C

**<sup>1</sup>H NMR (CDCl<sub>3</sub>, 400 MHz):**  $\delta$  7.36-7.31 (m, 2H), 7.28 (d, *J* = 8.0 Hz, 2H), 7.24 – 7.21 (m, 1H), 7.19-7.16 (m, 1H), 7.11-7.04 (m, 5H), 6.87-6.84 (m, 2H), 4.47 (d, *J* = 5.6 Hz, 1H), 4.21 (d, *J* = 5.6 Hz, 1H), 2.61 (s, 3H).

**<sup>13</sup>C NMR (CDCl<sub>3</sub>, 175 MHz):**  $\delta$  167.7, 145.4, 142.5, 136.8, 133.3, 131.0, 129.3, 129.1, 128.4, 128.1, 127.9, 126.2, 123.5, 121.8, 119.6, 78.4, 50.5, 39.1.

**IR (KBr, cm<sup>-1</sup>):** 3439, 1767, 1633, 1489, 1122.

**HRMS (ESI) m/z:** [M+H]<sup>+</sup> Calcd for C<sub>22</sub>H<sub>19</sub>NO<sub>2</sub>Br: 408.0599; Found: 408.0616.

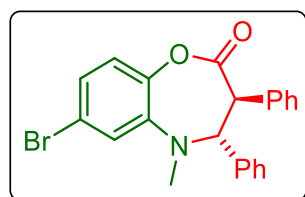

**(3S,4R)-7-bromo-5-methyl-3,4-diphenyl-4,5-**

**dihydrobenzo[b][1,4]oxazepin-2(3H)-one (5la):** was prepared according to general procedure (2d). The crude reaction mixture was purified by column chromatography using silica gel (100-200 mesh size) giving (7 mg) 17% yield.

**Physical State:** orange liquid.

**R<sub>f</sub>-value:** 0.5 (10% EtOAc/hexane)

**<sup>1</sup>H NMR (CDCl<sub>3</sub>, 400 MHz):**  $\delta$  7.30 (d, *J* = 8.4 Hz, 1H), 7.18-7.13 (m, 8H), 7.10 (d, *J* = 8.4 Hz, 1H), 6.99 (s, 1H), 6.81 (d, *J* = 7.0 Hz, 2H), 4.79 (d, *J* = 11.2 Hz, 1H), 4.23 (d, *J* = 11.2 Hz, 1H), 2.58 (s, 3H).

**<sup>13</sup>C NMR (CDCl<sub>3</sub>, 175 MHz):**  $\delta$  169.7, 146.0, 139.6, 136.0, 134.1, 130.0, 128.7 (2C), 128.5, 128.1, 127.6, 127.4, 126.1, 121.2, 118.8, 77.0, 54.0, 39.3.

**IR (KBr, cm<sup>-1</sup>):** 3438, 1766, 1633, 1485, 1129.

**HRMS (ESI) m/z:** [M+H]<sup>+</sup> Calcd for C<sub>22</sub>H<sub>19</sub>NO<sub>2</sub>Br: 408.0599; Found: 408.0576.

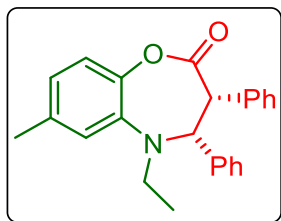

**(3R,4R)-5-ethyl-7-methyl-3,4-diphenyl-4,5-dihydrobenzo[b][1,4]oxazepin-2(3H)-one (5ma)**: was prepared according to general procedure (2d). The crude reaction mixture was purified by column chromatography using silica gel (100-200 mesh size) giving (20 mg) 56% yield.

**Physical State:** yellow solid

**R<sub>f</sub>-value:** 0.5 (10% EtOAc/hexane), **mp:** 172 °C

**<sup>1</sup>H NMR (CDCl<sub>3</sub>, 400 MHz):**  $\delta$  7.34-7.30 (m, 1H), 7.26-7.23 (m, 2H), 7.17-7.04 (m, 7H), 7.00 (d, *J* = 2.0 Hz, 1H), 6.85-6.83 (m, 2H), 4.43 (d, *J* = 6.0 Hz, 1H), 4.33 (d, *J* = 6.0 Hz, 1H), 3.15-3.06 (m, 1H), 2.93-2.84 (m, 1H), 2.37 (s, 3H), 0.95 (t, *J* = 6.8 Hz, 3H).

**<sup>13</sup>C NMR (CDCl<sub>3</sub>, 175 MHz):**  $\delta$  168.8, 147.4, 137.7, 135.8, 133.9, 133.7, 131.0, 129.4, 128.7, 128.2, 127.8, 127.7, 127.0, 121.1, 121.0, 77.7, 50.7, 43.3, 20.9, 12.8.

**IR (KBr, cm<sup>-1</sup>):** 3438, 2971, 1765, 1501, 1124.

**HRMS (ESI) m/z:** [M+H]<sup>+</sup> Calcd for C<sub>24</sub>H<sub>24</sub>NO<sub>2</sub>: 358.1807; Found: 358.1803.

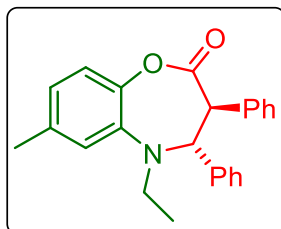

**(3S,4R)-5-ethyl-7-methyl-3,4-diphenyl-4,5-dihydrobenzo[b][1,4]oxazepin-2(3H)-one (5ma)**: was prepared according to general procedure (2.2). The crude reaction mixture was purified by column chromatography using silica gel (100-200 mesh size) giving (4 mg) 11% yield.

**Physical State:** colorless liquid

**R<sub>f</sub>-value:** 0.4 (10% EtOAc/hexane)

**<sup>1</sup>H NMR (CDCl<sub>3</sub>, 400 MHz):**  $\delta$  7.21-7.05 (m, 9H), 7.02-6.99 (m, 1H), 6.81 (dd, *J* = 8.0 Hz, 1.6 Hz, 2H), 6.75 (d, *J* = 8.0 Hz, 1H), 4.87 (d, *J* = 11.6 Hz, 1H), 4.24 (d, *J* = 11.6 Hz, 1H), 2.91-2.77 (m, 2H), 2.41 (s, 3H), 1.08 (t, *J* = 7.2 Hz, 3H).

**<sup>13</sup>C NMR (CDCl<sub>3</sub>, 175 MHz):**  $\delta$  170.8, 147.7, 136.5, 134.9, 134.8, 133.8, 131.0, 130.1, 128.4 (2C), 128.3, 127.9 (2C), 126.4, 124.1, 120.3, 75.3, 54.2, 45.0, 21.2, 13.1.

**IR (KBr, cm<sup>-1</sup>):** 3439, 1761, 1634, 1498, 1128.

**HRMS (ESI) m/z:** [M+H]<sup>+</sup> Calcd for C<sub>24</sub>H<sub>24</sub>NO<sub>2</sub>: 358.1807; Found: 358.1808.

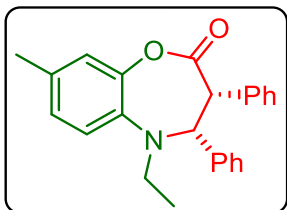

**(3R,4R)-5-ethyl-8-methyl-3,4-diphenyl-4,5-dihydrobenzo[b][1,4]oxazepin-2(3H)-one (5na')**: was prepared according to general procedure (2d). The crude reaction mixture was purified by column chromatography using silica gel (100-200 mesh size) giving (16 mg) 45% yield.

**Physical State:** orange liquid.

**R<sub>f</sub>-value:** 0.4 (10% EtOAc/hexane)

**<sup>1</sup>H NMR (CDCl<sub>3</sub>, 400 MHz):**  $\delta$ . 7.34-7.30 (m, 1H), 7.27-7.23 (m, 2H), 7.18-7.13 (m, 1H), 7.09-7.02 (m, 6H), 6.89 (dd,  $J = 8.0$  Hz, 1.6 Hz, 1H), 6.86-6.84 (m, 2H), 4.47 (d,  $J = 5.6$  Hz, 1H), 4.36 (d,  $J = 5.6$  Hz, 1H), 3.18-3.09 (m, 1H), 2.96-2.87 (m, 1H), 2.42 (s, 3H), 0.97 (t,  $J = 7.2$  Hz, 3H).

**<sup>13</sup>C NMR (CDCl<sub>3</sub>, 175 MHz):**  $\delta$  168.9, 145.2, 138.1, 137.7, 136.3, 133.9, 131.1, 129.4, 128.8, 128.2, 127.8, 128.7, 123.9, 121.7, 120.3, 77.3, 50.5, 43.3, 21.7, 12.7.

**IR (KBr, cm<sup>-1</sup>):** 3450, 2972, 1764, 1508, 1123.

**HRMS (ESI) m/z:** [M+H]<sup>+</sup> Calcd for C<sub>24</sub>H<sub>24</sub>NO<sub>2</sub>: 358.1807; Found: 358.1818.

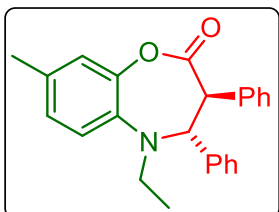

**(3S,4R)-5-ethyl-8-methyl-3,4-diphenyl-4,5-dihydrobenzo[b][1,4]oxazepin-2(3H)-one (5na)**: was prepared according to general procedure (2d). The crude reaction mixture was purified by column chromatography using silica gel (100-200 mesh size) giving (4 mg) 11% yield.

**Physical State:** orange liquid.

**R<sub>f</sub>-value:** 0.3 (10% EtOAc/hexane)

**<sup>1</sup>H NMR (CDCl<sub>3</sub>, 400 MHz):**  $\delta$  7.18-7.11 (m, 9H), 6.99-6.97 (m, 1H), 6.82-6.80 (m, 2H), 6.68 (d,  $J = 1.6$  Hz, 1H), 4.89 (d,  $J = 11.6$  Hz, 1H), 4.25 (d,  $J = 11.6$  Hz, 1H), 2.92-2.77 (m, 2H), 2.35 (s, 3H), 1.11 (t,  $J = 7.2$  Hz, 3H).

**<sup>13</sup>C NMR (CDCl<sub>3</sub>, 175 MHz):**  $\delta$  170.8, 145.6, 136.6, 136.4, 135.6, 134.7, 130.1, 128.4 (2C), 128.3, 127.9(2C), 125.2, 124.8, 119.5, 75.0, 54.0, 45.0, 21.5, 13.1.

**IR (KBr, cm<sup>-1</sup>):** 3451, 2923, 1763, 1506, 1126.

**HRMS (ESI) m/z:** [M+H]<sup>+</sup> Calcd for C<sub>24</sub>H<sub>24</sub>NO<sub>2</sub>: 358.1807; Found: 358.1818.

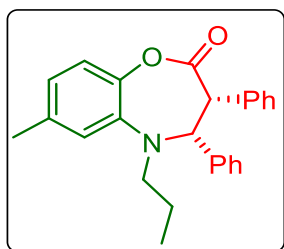

**(3R,4R)-7-methyl-3,4-diphenyl-5-propyl-4,5-**

**dihydrobenzo[b][1,4]oxazepin-2(3H)-one (5oa')**: was prepared according to general procedure (2d). The crude reaction mixture was purified by column chromatography using silica gel (100-200 mesh size) giving (9 mg) 24% yield.

**Physical State:** yellow liquid

**R<sub>f</sub>-value:** 0.5 (10% EtOAc/hexane)

**<sup>1</sup>H NMR (CDCl<sub>3</sub>, 400 MHz):**  $\delta$  7.34-7.30 (m, 1H), 7.27-7.23 (m, 1H), 7.15 (t,  $J = 7.6$  Hz, 1H), 7.09-7.04 (m, 6H), 7.00 (s, 1H), 6.90 (d,  $J = 8.4$  Hz, 1H), 6.83 (d,  $J = 7.6$  Hz, 2H), 4.45 (d,  $J = 5.6$  Hz, 1H), 4.30 (d,  $J = 5.6$  Hz, 1H), 3.11-3.05 (m, 1H), 2.75-2.68 (m, 1H), 2.42 (s, 3H), 1.44-1.39 (m, 2H), 0.71 (t,  $J = 7.2$  Hz, 3H).

**<sup>13</sup>C NMR (CDCl<sub>3</sub>, 175 MHz):**  $\delta$  169.0, 145.3, 138.1, 137.7, 136.2, 134.0, 131.1, 129.6, 128.8, 128.2, 127.8, 127.7, 124.0, 121.9, 120.3, 77.7, 50.6, 50.5, 21.7, 20.2, 11.7.

**IR (KBr, cm<sup>-1</sup>):** 3442, 2961, 1766, 1499, 1123.

**HRMS (ESI) m/z:** [M+H]<sup>+</sup> Calcd for C<sub>25</sub>H<sub>26</sub>NO<sub>2</sub>: 372.1964; Found: 372.1951.

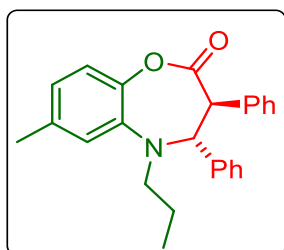

**(3S,4R)-7-methyl-3,4-diphenyl-5-propyl-4,5-**

**dihydrobenzo[b][1,4]oxazepin-2(3H)-one (5oa)**: was prepared according to general procedure (2d). The crude reaction mixture was purified by column chromatography using silica gel (100-200 mesh size) giving (17 mg) 46% yield.

**Physical State:** yellow liquid

**R<sub>f</sub>-value:** 0.4 (10% EtOAc/hexane)

**<sup>1</sup>H NMR (CDCl<sub>3</sub>, 400 MHz):**  $\delta$  7.20-7.18 (m, 2H), 7.15-7.11 (m, 7H), 6.98 (d,  $J = 8.4$  Hz, 1H), 6.82 (d,  $J = 6.8$  Hz, 2H), 6.69 (s, 1H), 4.84 (d,  $J = 11.6$  Hz, 1H), 4.25 (d,  $J = 11.6$  Hz, 1H), 2.88-2.81 (m, 1H), 2.75-2.69 (m, 1H), 2.34 (s, 3H), 1.53-1.48 (m, 2H), 0.87 (t,  $J = 7.2$  Hz, 3H).

**<sup>13</sup>C NMR (CDCl<sub>3</sub>, 175 MHz):**  $\delta$  170.7, 145.7, 136.7, 136.5, 135.6, 134.7, 130.1, 128.4, 128.2 (2C), 127.9 (2C), 125.2, 125.0, 119.5, 75.1, 54.0, 52.4, 21.5, 20.6, 11.7.

**IR (KBr, cm<sup>-1</sup>):** 3443, 2960, 1763, 1498, 1129.

**HRMS (ESI) m/z:** [M+H]<sup>+</sup> Calcd for C<sub>25</sub>H<sub>26</sub>NO<sub>2</sub>: 372.1964; Found: 372.1951.



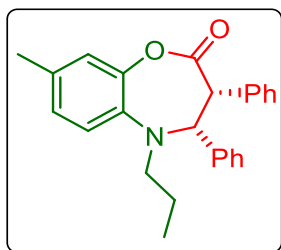

**(3R,4R)-8-methyl-3,4-diphenyl-5-propyl-4,5-dihydrobenzo[b][1,4]oxazepin-2(3H)-one (5pa')**: was prepared according to general procedure (2d). The crude reaction mixture was purified by column chromatography using silica gel (100-200 mesh size) giving (10 mg) 27% yield.

**Physical State:** yellow liquid

**R<sub>f</sub>-value:** 0.5 (10% EtOAc/hexane)

**<sup>1</sup>H NMR (CDCl<sub>3</sub>, 400 MHz):** δ 7.32 (t, *J* = 7.2 Hz, 1H), 7.25-7.22 (m, 2H), 7.14-7.03 (m, 7H), 7.01 (s, 1H), 6.82 (d, *J* = 8.0 Hz, 2H), 4.42 (d, *J* = 6.0 Hz, 1H), 4.28 (d, *J* = 6.0 Hz, 1H), 3.09-3.03 (m, 1H), 2.74-2.66 (m, 1H), 2.37 (s, 3H), 1.42-1.37 (m, 2H), 0.70 (t, *J* = 7.2 Hz, 3H).

**<sup>13</sup>C NMR (CDCl<sub>3</sub>, 175 MHz):** δ 169.0, 1475, 137.7, 135.8, 133.9 (2C), 131.0, 129.6, 128.7, 128.1, 127.8, 127.7, 127.0, 121.2, 121.1, 78.1, 50.7, 50.5, 21.0, 20.3, 11.6.

**IR (KBr, cm<sup>-1</sup>):** 3451, 2962, 1765, 1507, 1122.

**HRMS (ESI) m/z:** [M+H]<sup>+</sup> Calcd for C<sub>25</sub>H<sub>26</sub>NO<sub>2</sub>: 372.1964; Found: 372.1977.

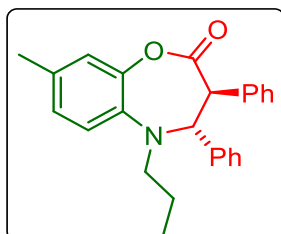

**(3S,4R)-8-methyl-3,4-diphenyl-5-propyl-4,5-dihydrobenzo[b][1,4]oxazepin-2(3H)-one (5pa)**: was prepared according to general procedure (2d). The crude reaction mixture was purified by column chromatography using silica gel (100-200 mesh size) giving (20 mg) 54% yield.

**Physical State:** orange liquid

**R<sub>f</sub>-value:** 0.4 (10% EtOAc/hexane)

**<sup>1</sup>H NMR (CDCl<sub>3</sub>, 400 MHz):** δ 7.21-7.10 (m, 8H), 7.05 (s, 1H), 7.00 (d, *J* = 8.0 Hz, 1H), 6.81 (d, *J* = 6.0 Hz, 2H), 6.77 (d, *J* = 8.4 Hz, 1H), 4.83 (d, *J* = 11.6 Hz, 1H), 4.25 (d, *J* = 11.6 Hz, 1H), 2.85-2.79 (m, 1H), 2.75-2.68 (m, 1H), 2.41 (s, 3H), 1.52-1.47 (m, 2H), 0.86 (t, *J* = 7.2 Hz, 3H).

**<sup>13</sup>C NMR (CDCl<sub>3</sub>, 175 MHz):** δ 170.7, 147.8, 136.6, 134.9, 134.8, 133.9, 130.1, 128.4 (2C), 128.2, 127.9 (2C), 126.4, 124.3, 120.3, 75.5, 54.2, 52.4, 21.2, 20.5, 11.7.

**IR (KBr, cm<sup>-1</sup>):** 3451, 2961, 1765, 1505, 1127.

**HRMS (ESI) m/z:** [M+H]<sup>+</sup> Calcd for C<sub>25</sub>H<sub>26</sub>NO<sub>2</sub>: 372.1964; Found: 372.1949.

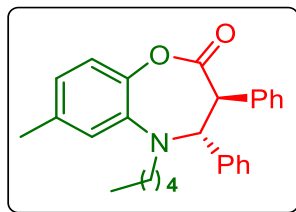

**(3S,4R)-7-methyl-5-pentyl-3,4-diphenyl-4,5-dihydrobenzo[b][1,4]oxazepin-2(3H)-one (5qa):** was prepared according to general procedure (2d). The crude reaction mixture was purified by column chromatography using silica gel (100-200 mesh size) giving (16 mg) 40% yield.

**Physical State:** yellow liquid

**R<sub>f</sub>-value:** 0.4 (10% EtOAc/hexane)

**<sup>1</sup>H NMR (CDCl<sub>3</sub>, 400 MHz):**  $\delta$  7.20-7.11 (m, 9H), 6.98 (d,  $J$  = 8.4 Hz, 1H), 6.81 (d,  $J$  = 7.6 Hz, 2H), 6.69 (s, 1H), 4.84 (d,  $J$  = 11.6 Hz, 1H), 4.25 (d,  $J$  = 11.6 Hz, 1H), 2.89-2.82 (m, 1H), 2.77-2.70 (m, 1H), 2.34 (s, 3H), 1.52-1.49 (m, 2H), 1.27 (m, 4H), 0.85 (t,  $J$  = 6.8 Hz, 3H).

**<sup>13</sup>C NMR (CDCl<sub>3</sub>, 175 MHz):**  $\delta$  170.7, 145.7, 136.7, 135.6, 134.8, 130.1, 128.4 (2C), 128.2, 127.9 (2C), 125.2, 124.9, 119.5, 75.1, 54.0, 50.6, 29.3, 26.9, 22.6, 21.5, 14.3.

**IR (KBr, cm<sup>-1</sup>):** 3444, 2954, 1764, 1498, 1128.

**HRMS (ESI) m/z:** [M+H]<sup>+</sup> Calcd for C<sub>27</sub>H<sub>30</sub>NO<sub>2</sub>: 400.2277; Found: 400.2287.

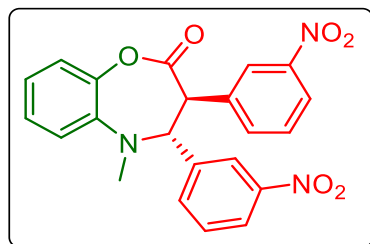

**(3S,4R)-5-methyl-3,4-bis(3-nitrophenyl)-4,5-dihydrobenzo[b][1,4]oxazepin-2(3H)-one (5ef+5ef'):** was prepared according to general procedure (2d). The crude reaction mixture was purified by column chromatography using silica gel (100-200 mesh size) giving (22 mg) 52% yield.

**Physical State:** yellow solid

**R<sub>f</sub>-value:** 0.5 (30% EtOAc/hexane); **mp:** 160 °C

**<sup>1</sup>H NMR (CDCl<sub>3</sub>, 700 MHz):**  $\delta$  8.09-8.05 (m, 3H), 7.73-7.72 (m, 1H), 7.62 (d,  $J$  = 7.7 Hz, 1H), 7.41 (t,  $J$  = 8.4 Hz, 1H), 7.38 (t,  $J$  = 7.7 Hz, 1H), 7.31-7.28 (m, 3H), 7.16 (d,  $J$  = 7.7 Hz, 1H), 6.93-6.92 (m, 1H), 4.93 (d,  $J$  = 11.9 Hz, 1H), 4.39 (d,  $J$  = 11.9 Hz, 1H), 2.66 (s, 3H).

**<sup>13</sup>C NMR (CDCl<sub>3</sub>, 175 MHz):**  $\delta$  168.4, 148.5, 148.4, 146.6, 138.0, 137.0, 136.2, 135.9, 133.5, 130.1, 129.8, 129.1, 126.9, 125.8, 125.1, 124.0, 123.6, 123.2, 122.3, 120.3, 77.9, 76.0, 53.6, 49.9, 39.4, 34.3.

**IR (KBr, cm<sup>-1</sup>):** 2937, 1760, 1526, 1348.

**HRMS (ESI) m/z:** [M+Na]<sup>+</sup> Calcd for C<sub>22</sub>H<sub>17</sub>N<sub>3</sub>O<sub>6</sub>Na: 442.1015; Found: 442.1014.

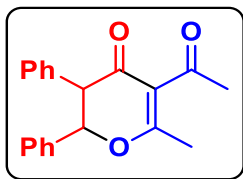

**5-acetyl-6-methyl-2,3-diphenyl-2,3-dihydro-4H-pyran-4-one (8aa):** was prepared according to general procedure (3eb). The crude reaction mixture was purified by column chromatography using silica gel (100-200 mesh size) giving (18 mg) 59% yield.

**Physical State:** white solid

**R<sub>f</sub>-value:** 0.5 (10% EtOAc/hexane); **mp:** 118 °C

**<sup>1</sup>H NMR (CDCl<sub>3</sub>, 400 MHz):**  $\delta$  7.39-7.36 (m, 5H), 7.26-7.22 (m, 5H), 3.03 (d,  $J = 15.2$  Hz, 1H), 2.81 (d,  $J = 14.8$  Hz, 1H), 2.23 (s, 3H), 1.63 (s, 3H).

**<sup>13</sup>C NMR (CDCl<sub>3</sub>, 100 MHz):**  $\delta$  204.8, 171.3, 164.4, 132.4, 129.8, 129.6, 129.5, 129.3, 128.8, 128.5, 128.4, 127.7, 85.7, 49.2, 32.4, 25.1.

**IR (KBr, cm<sup>-1</sup>):** 2918, 1742.

**HRMS (ESI) m/z:** [M+H]<sup>+</sup> Calcd for C<sub>20</sub>H<sub>19</sub>O<sub>3</sub>: 307.1334; Found: 307.1315.

## 5. Copies of $^1\text{H}$ NMR and $^{13}\text{C}$ NMR spectra:

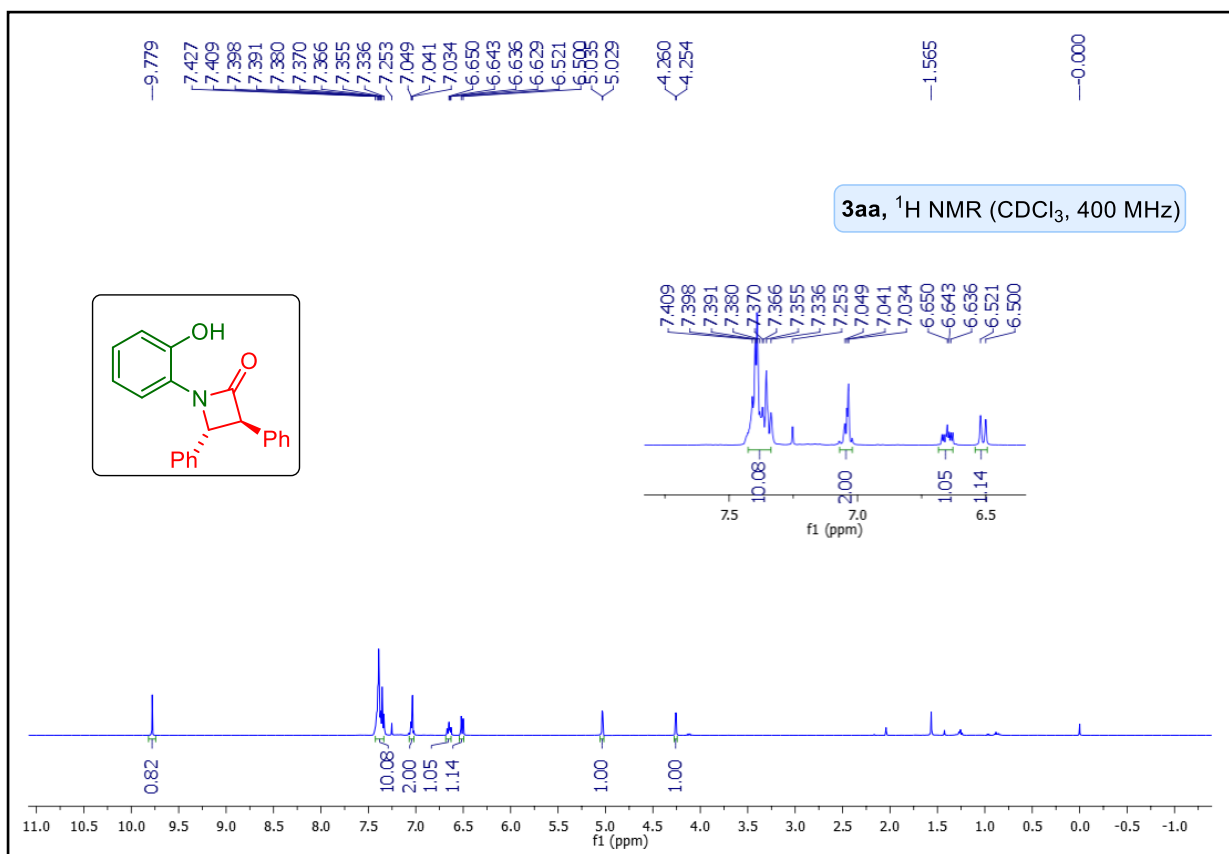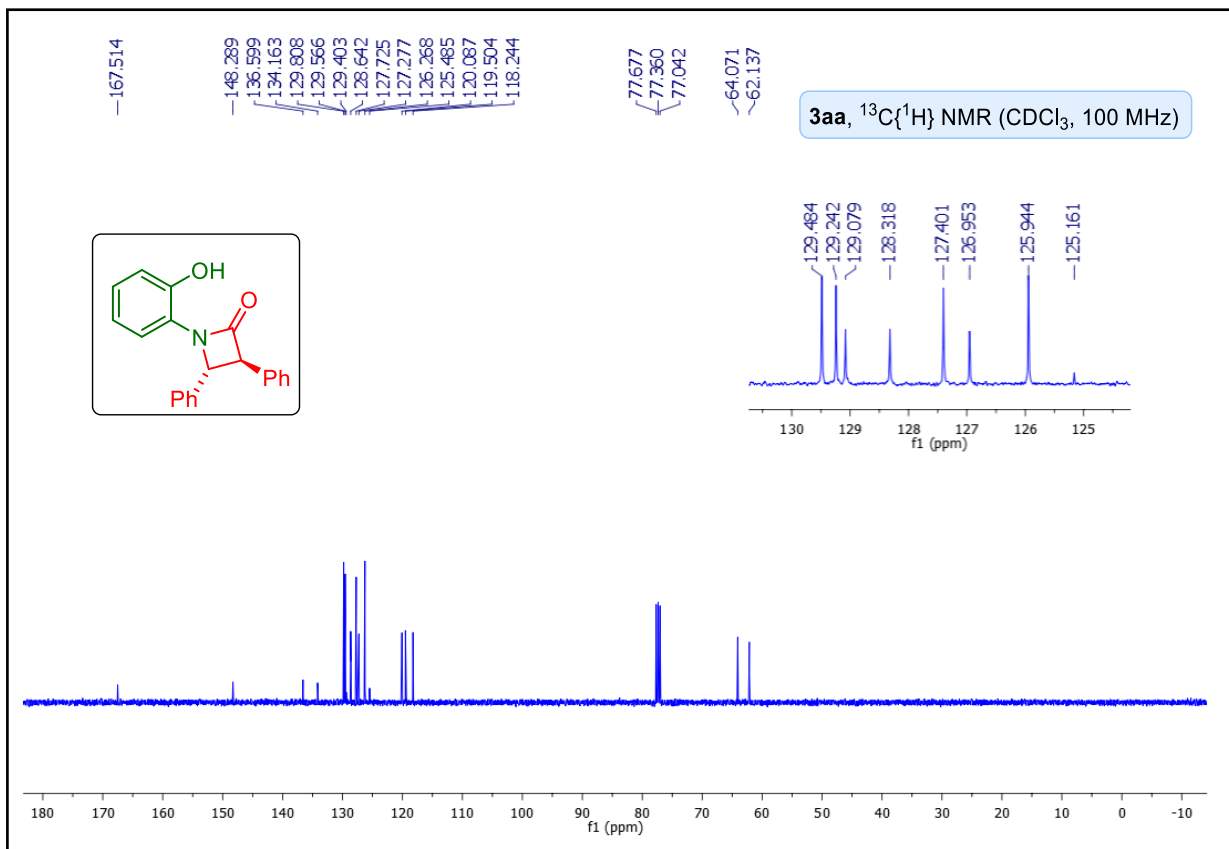

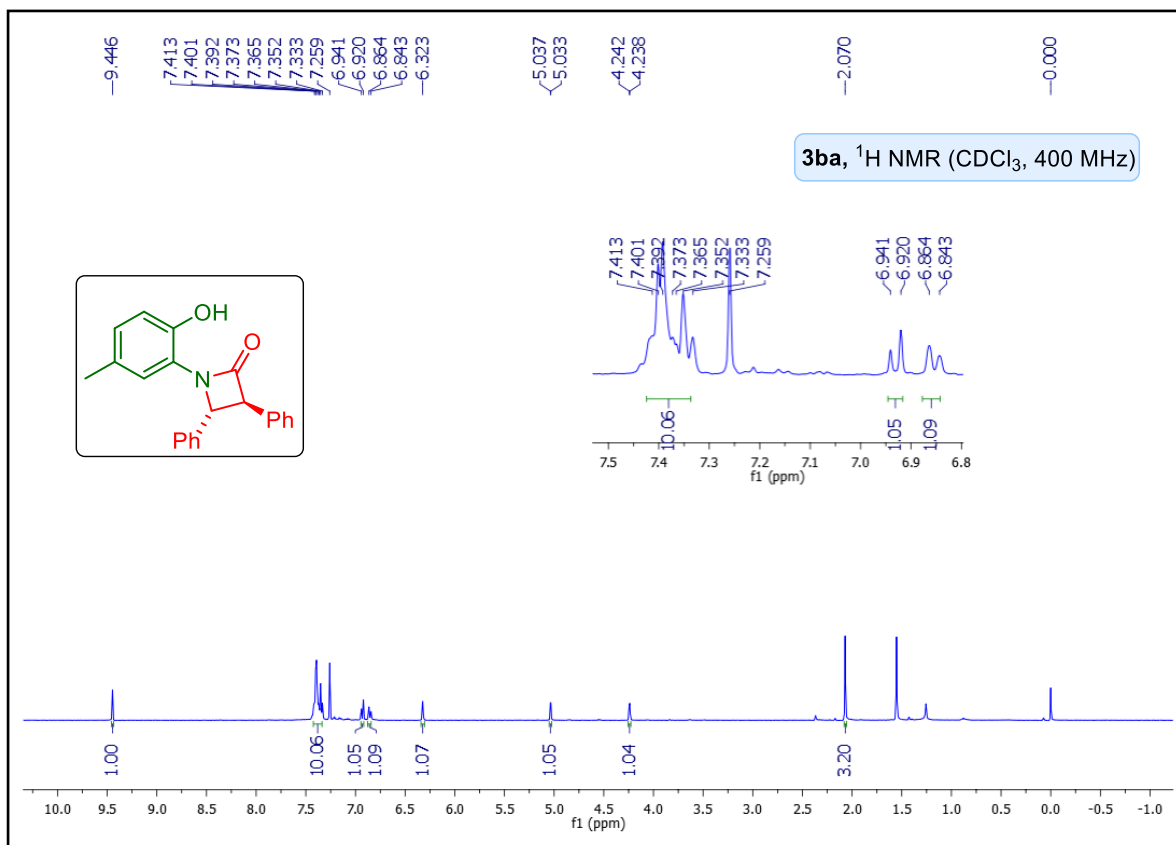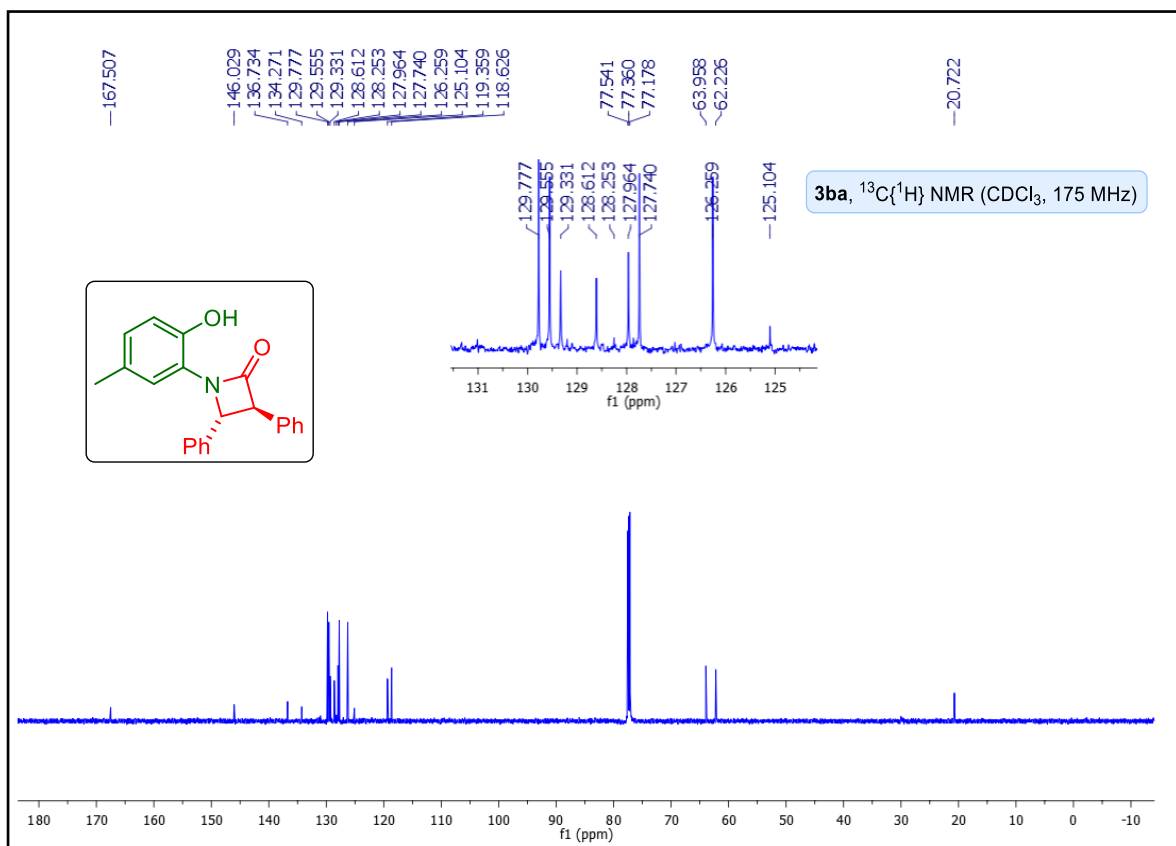

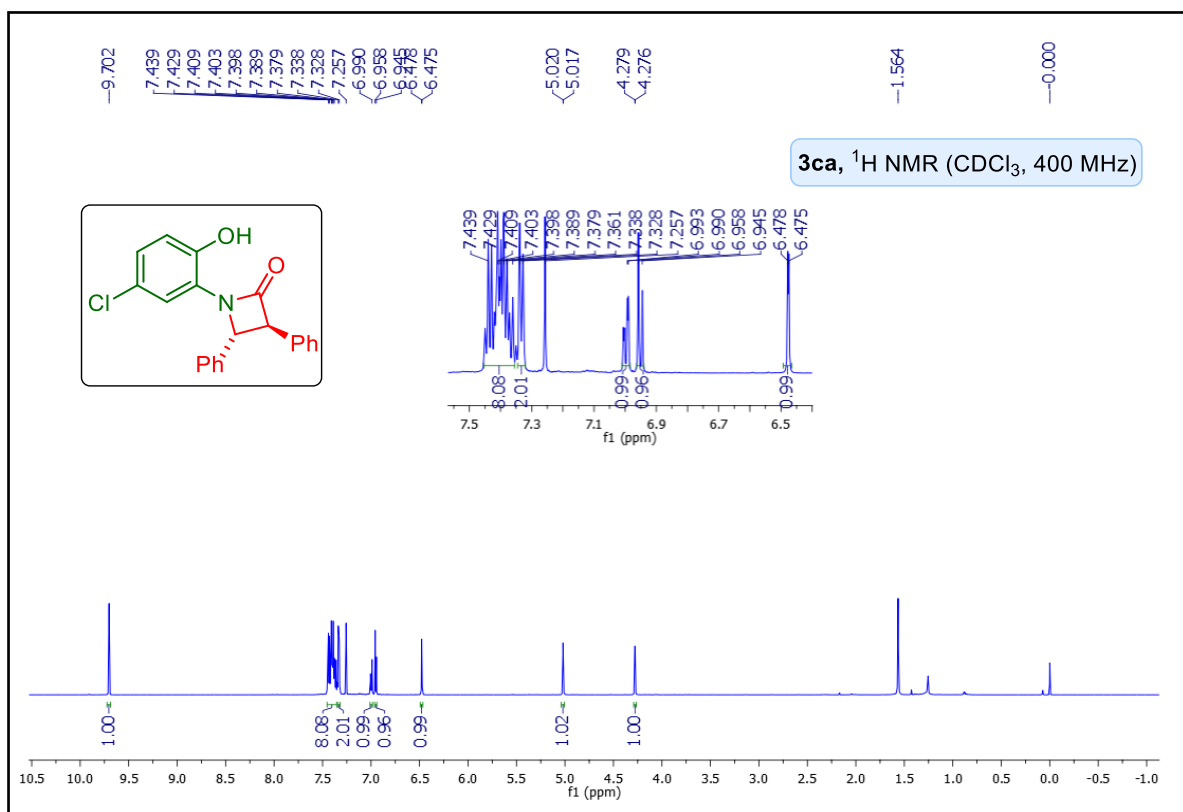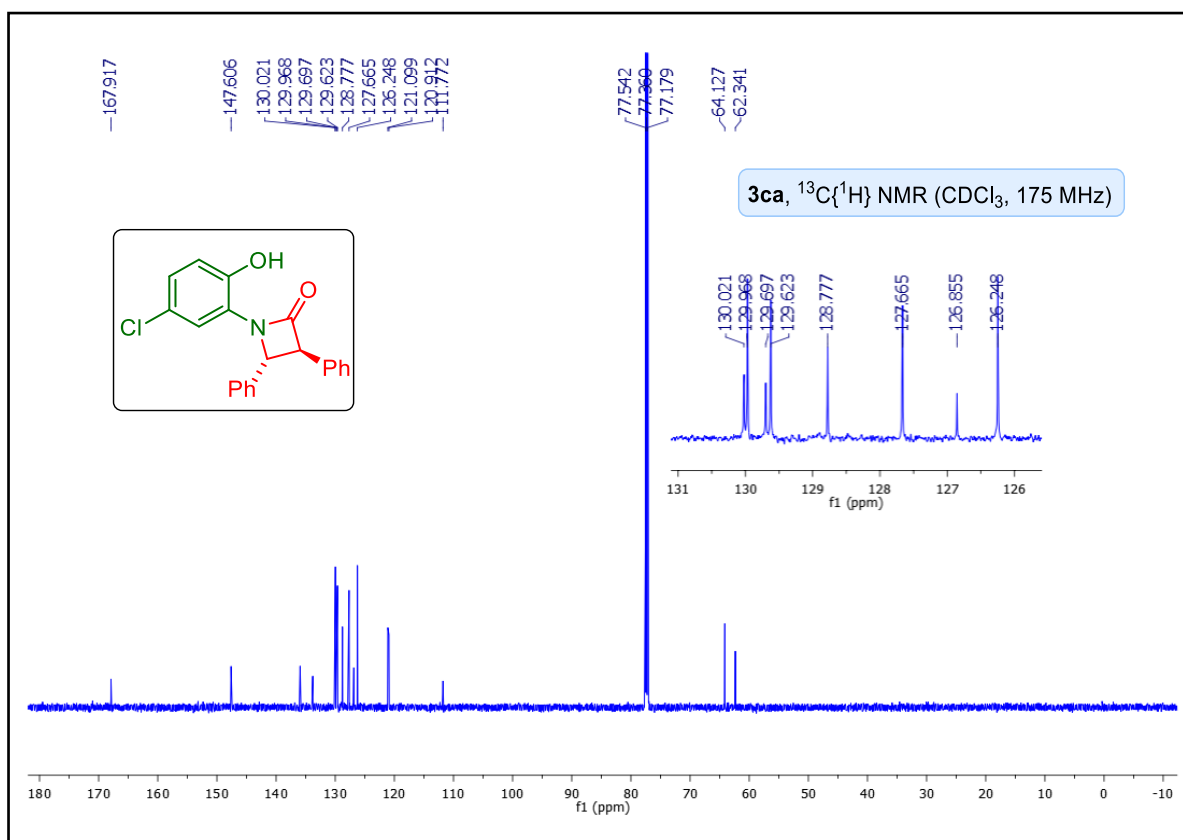

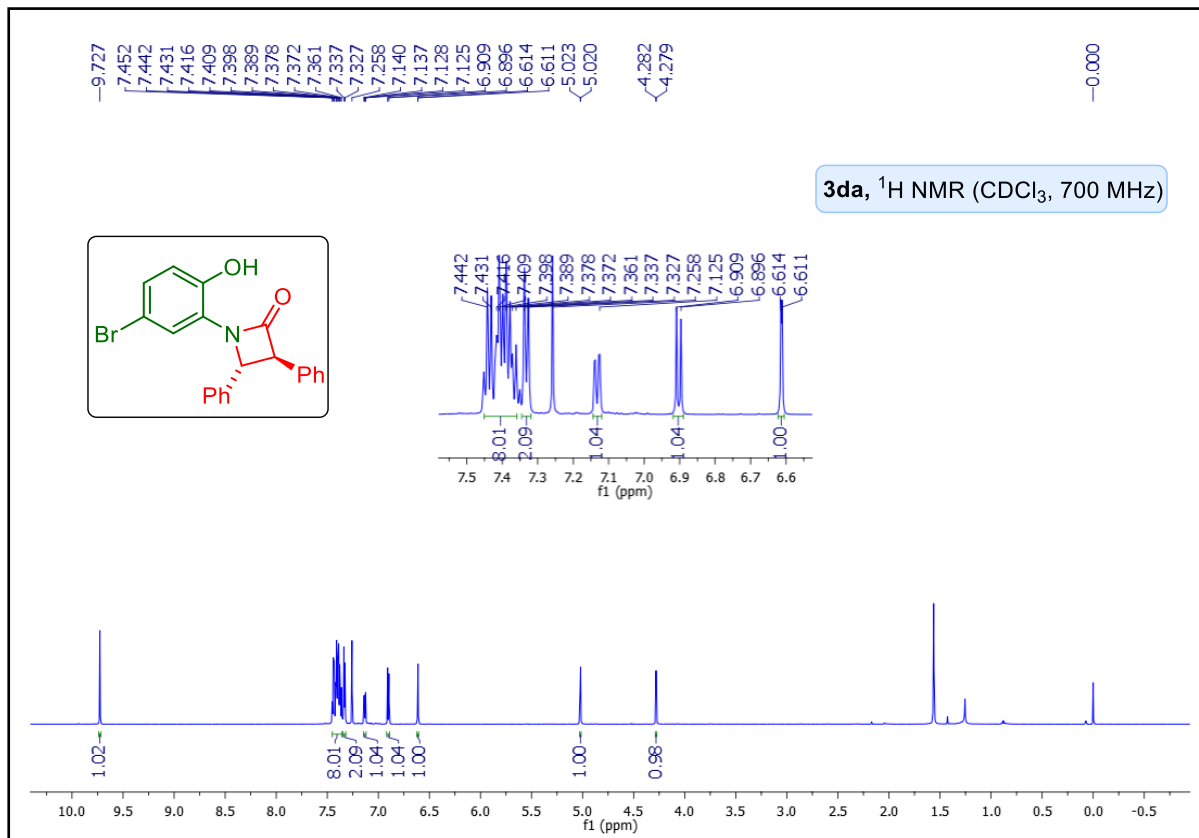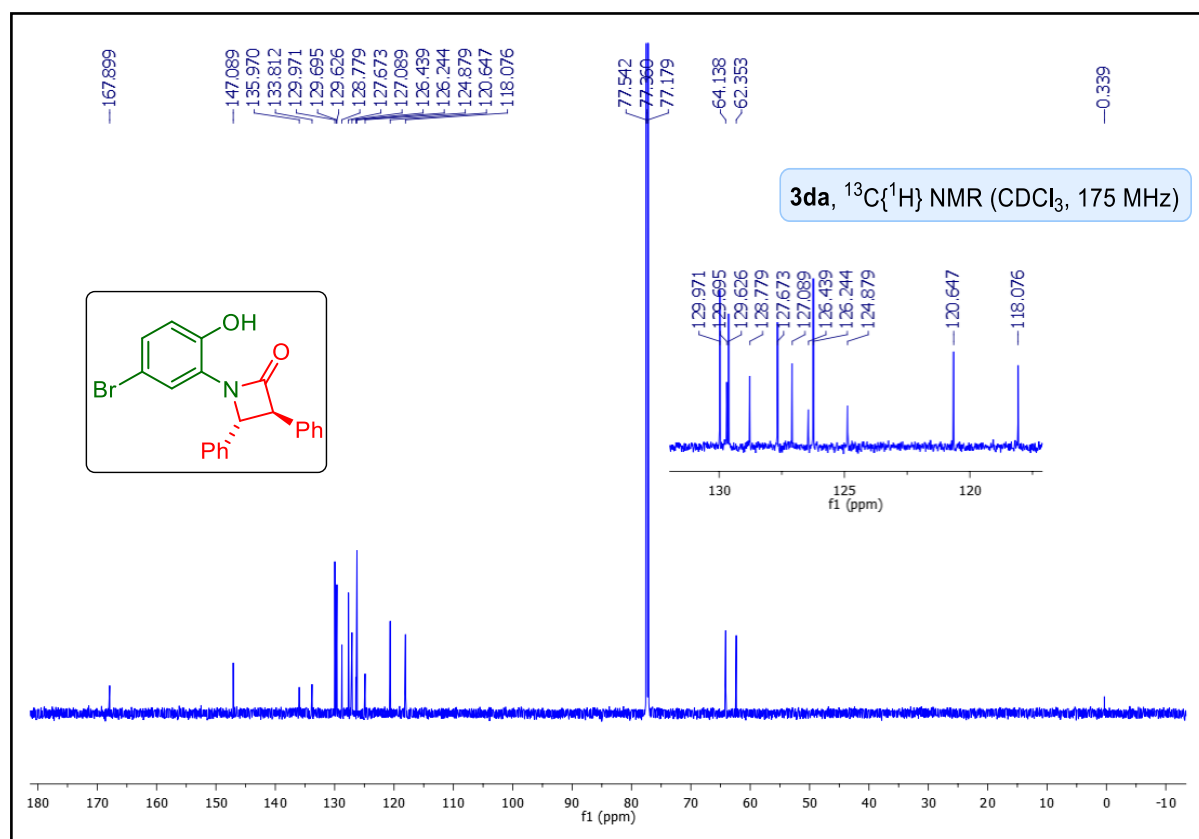

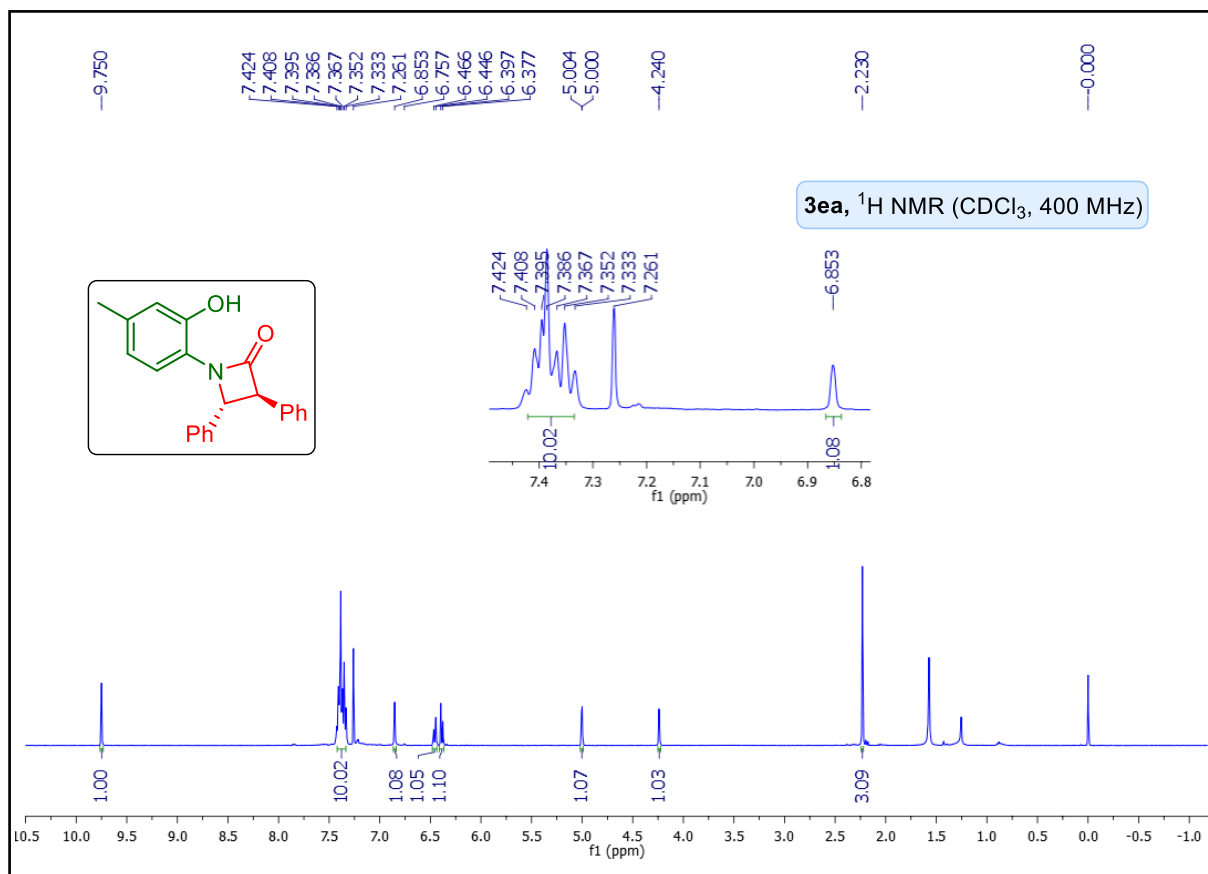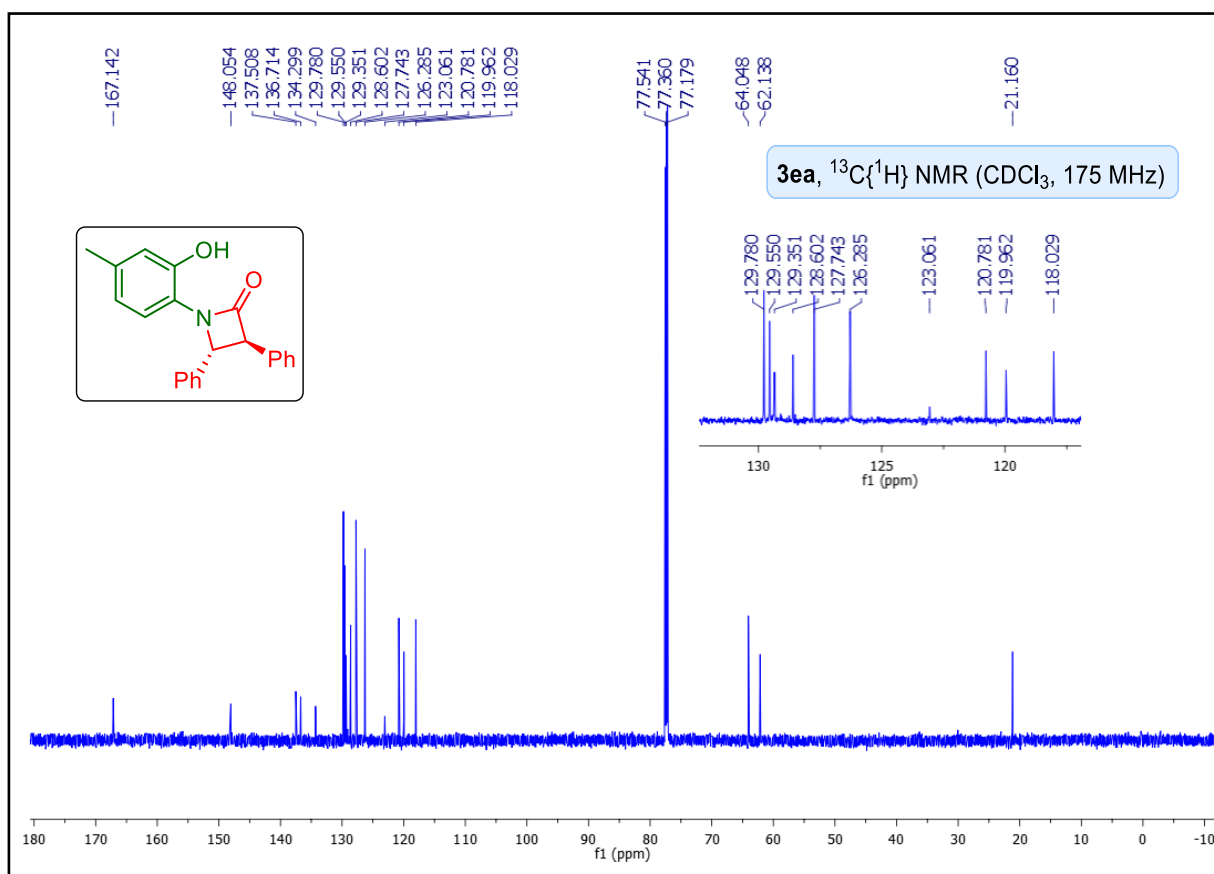



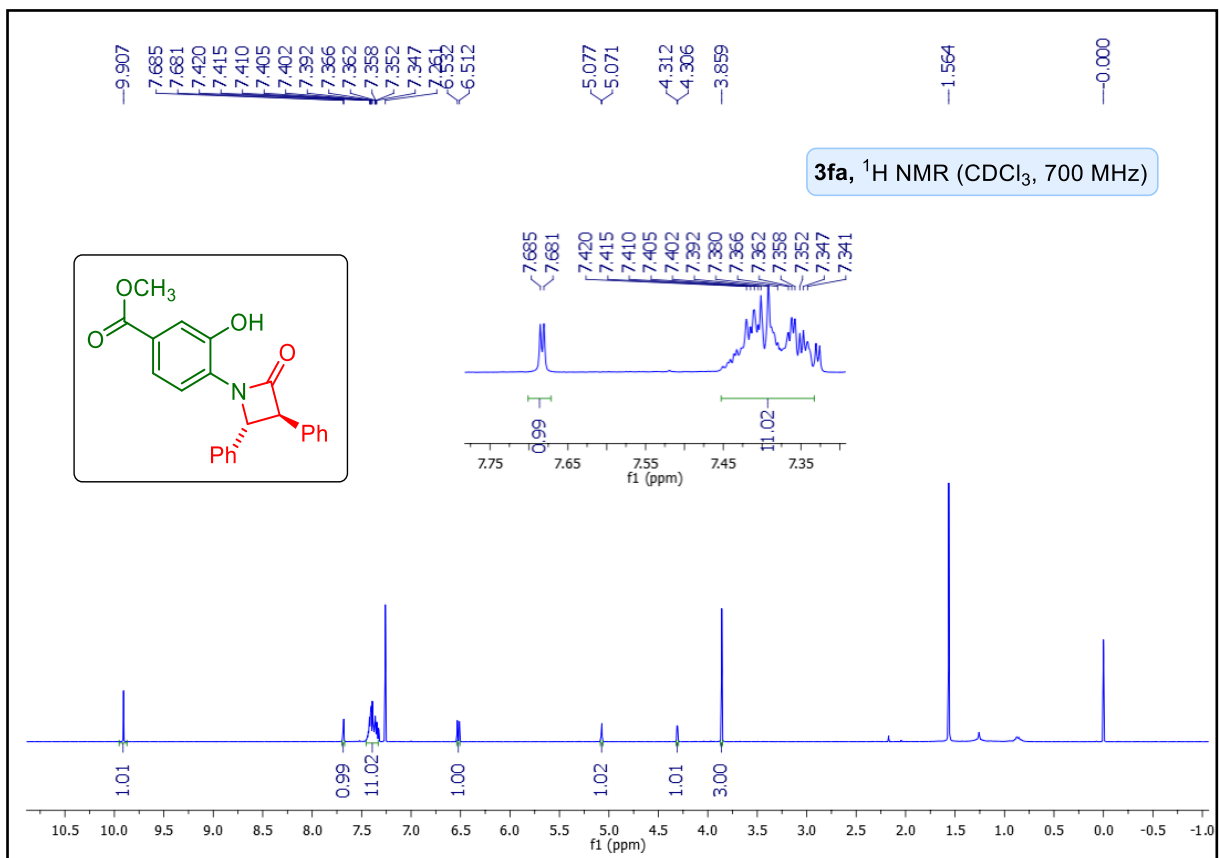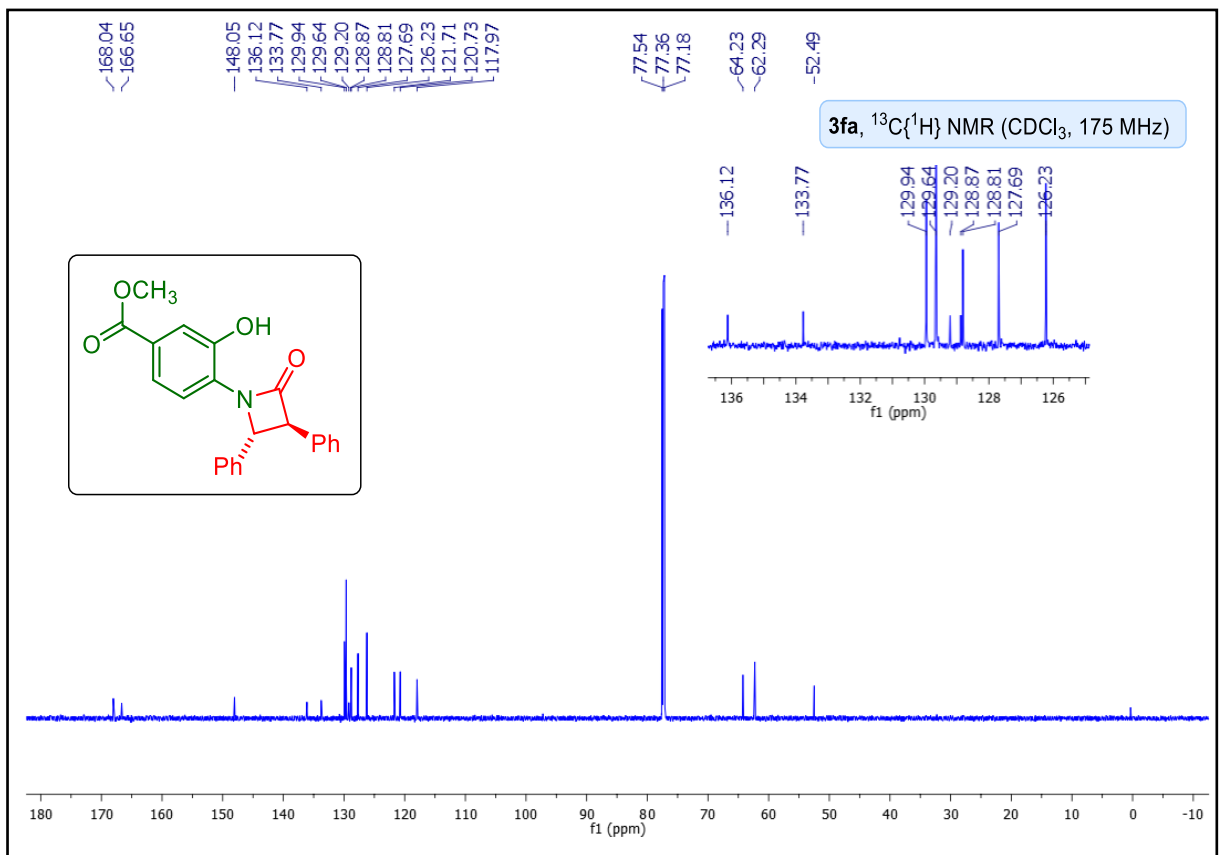

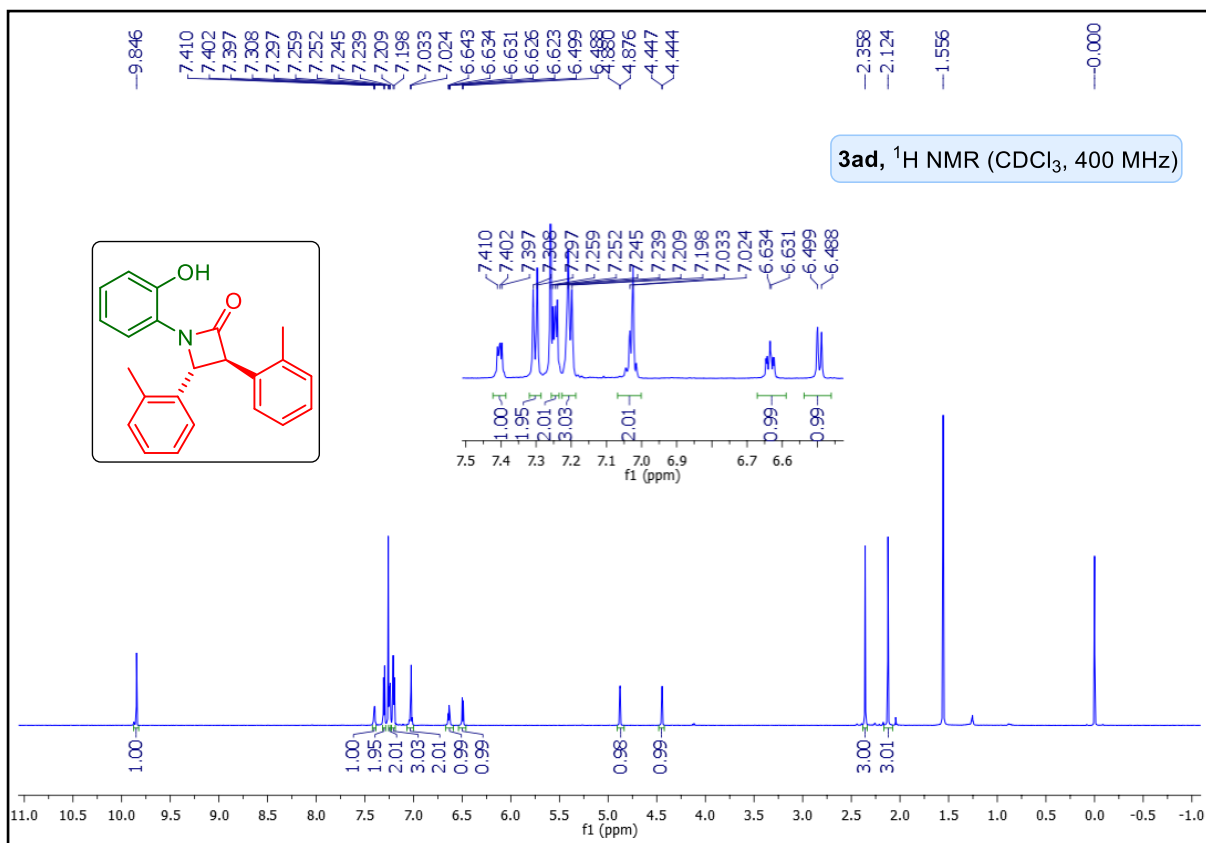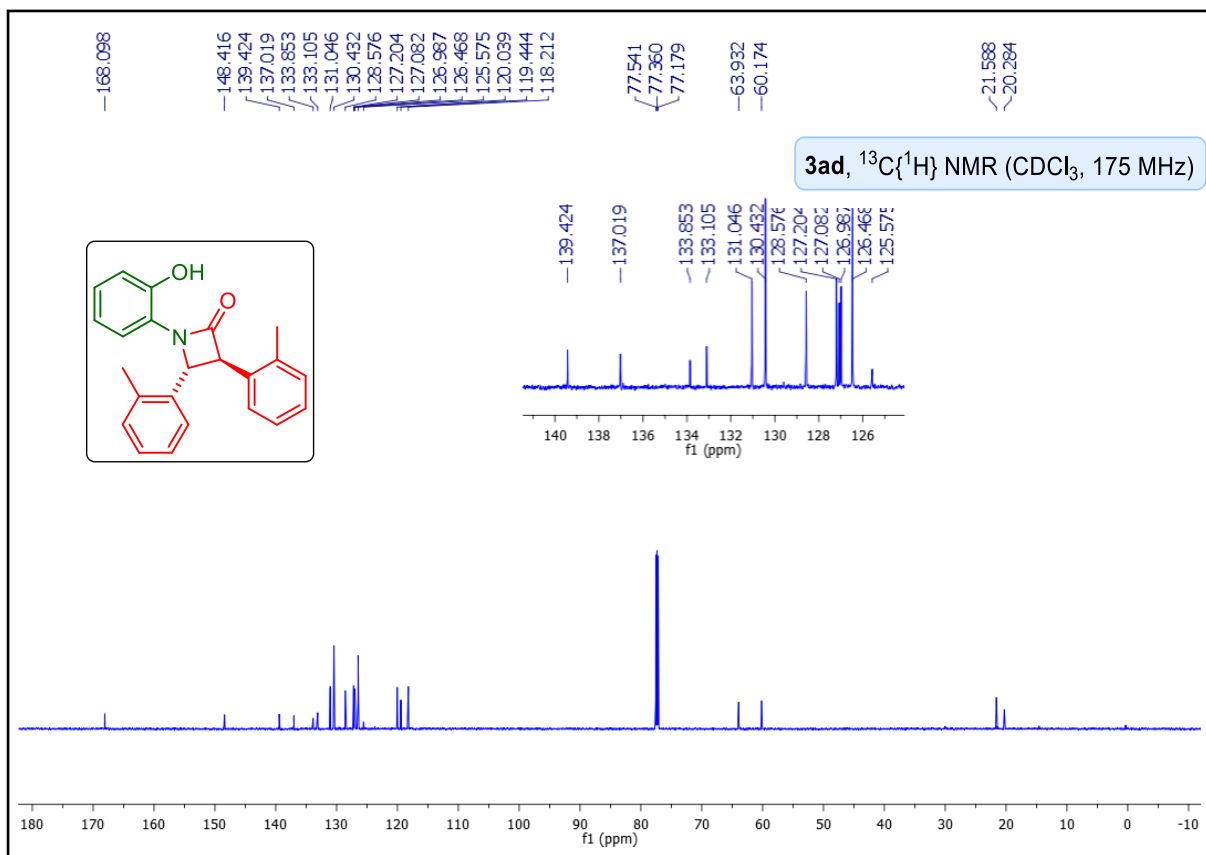

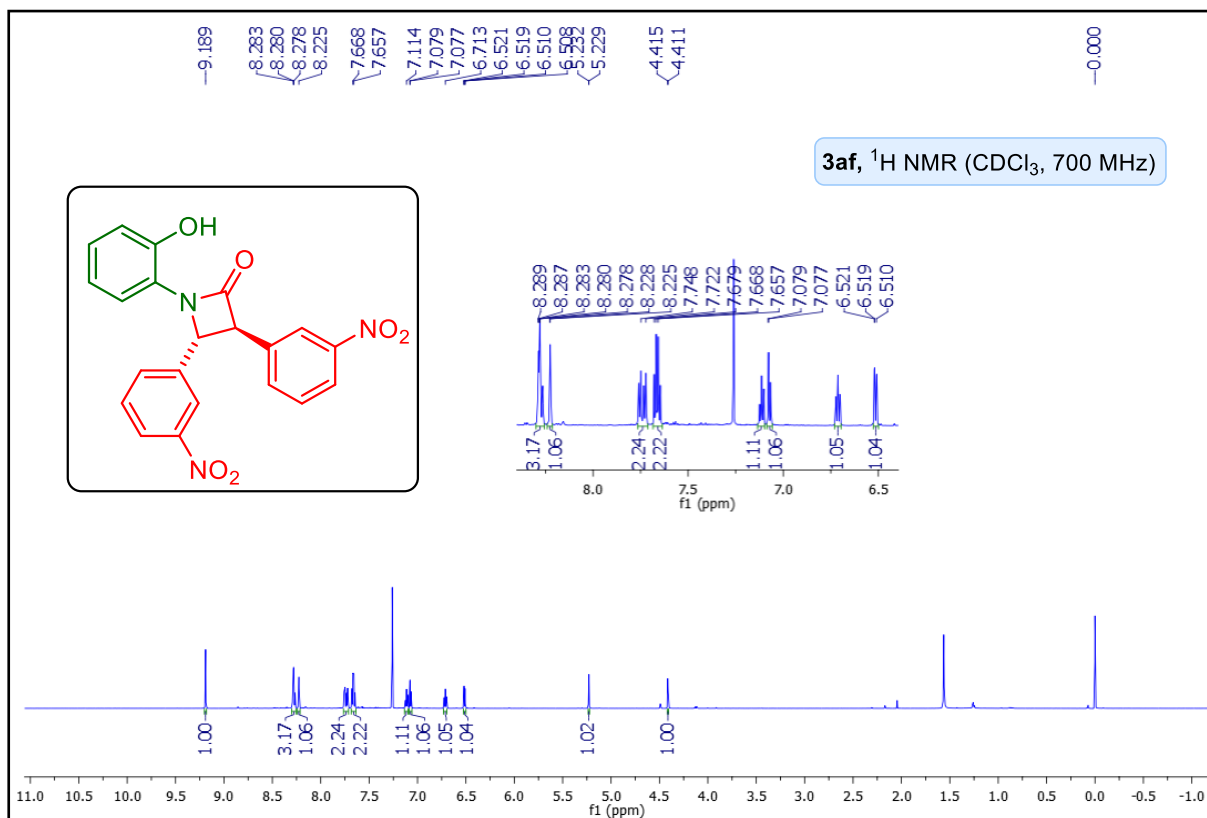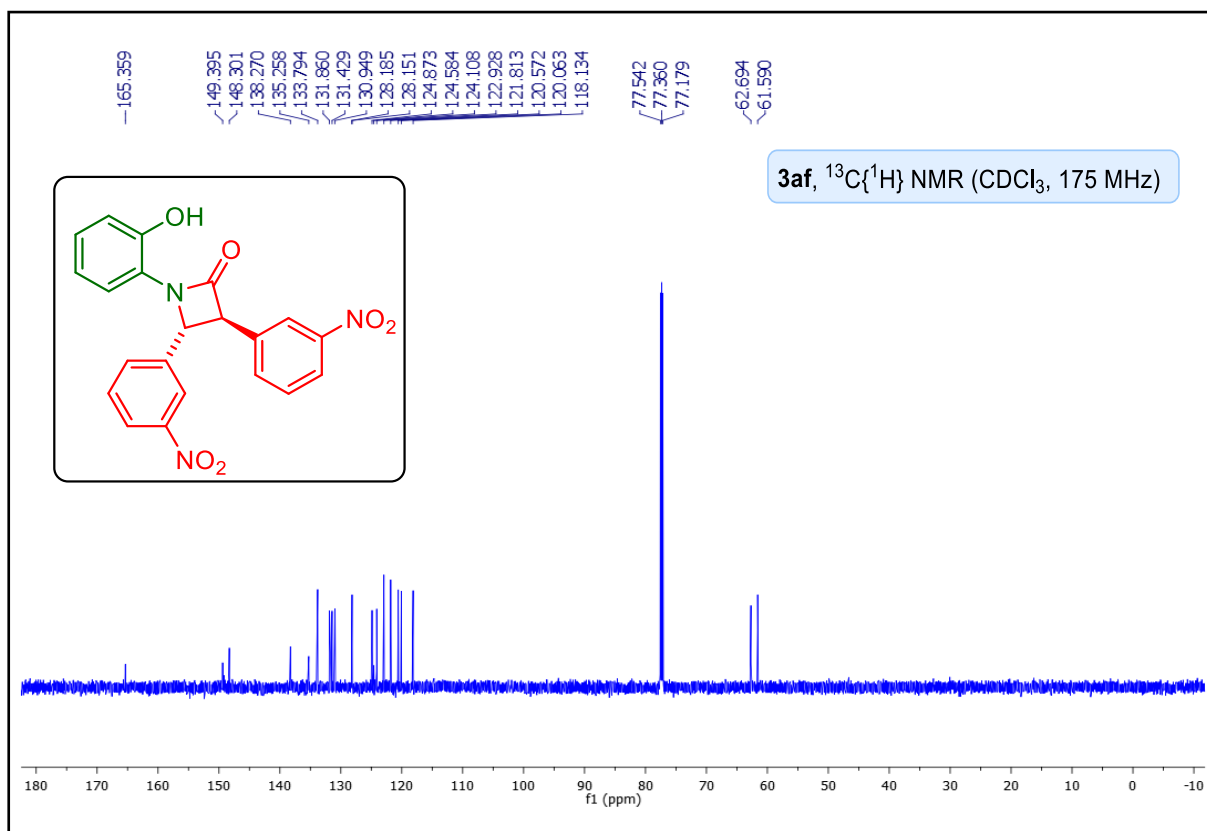

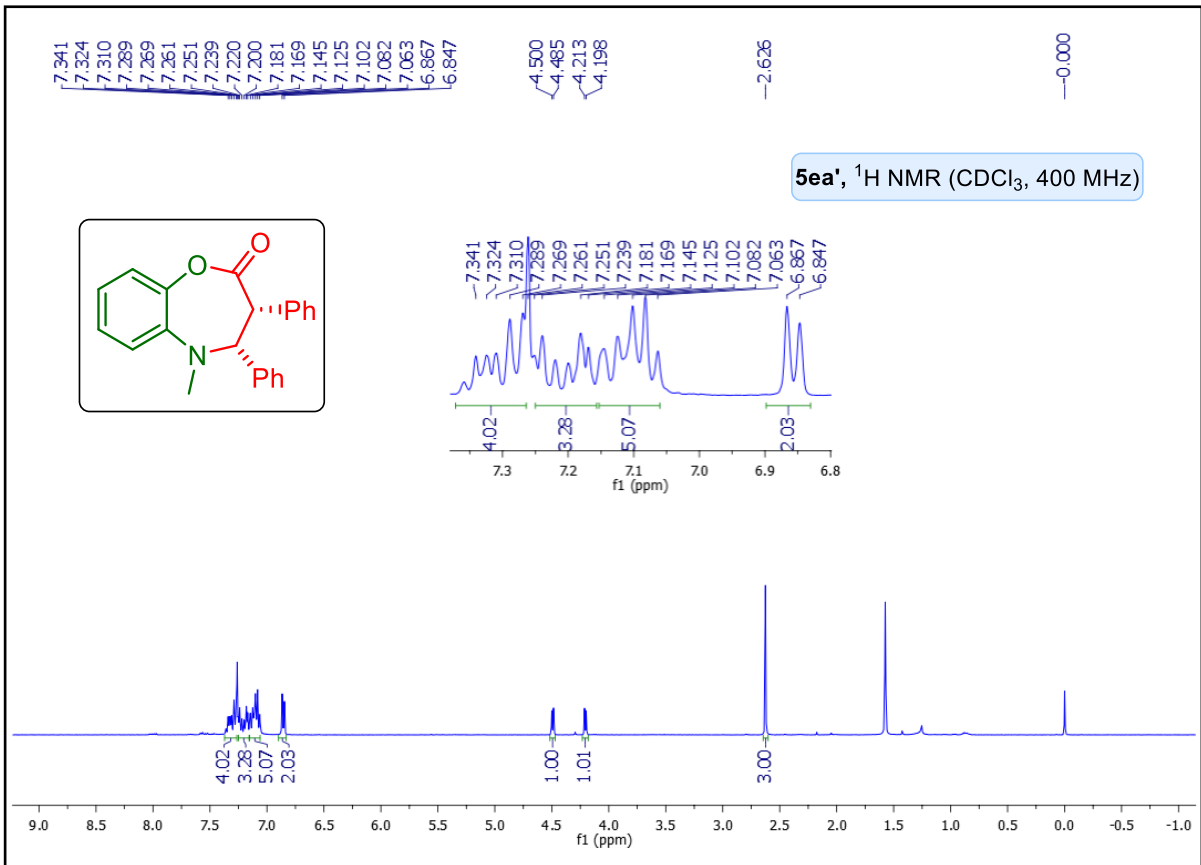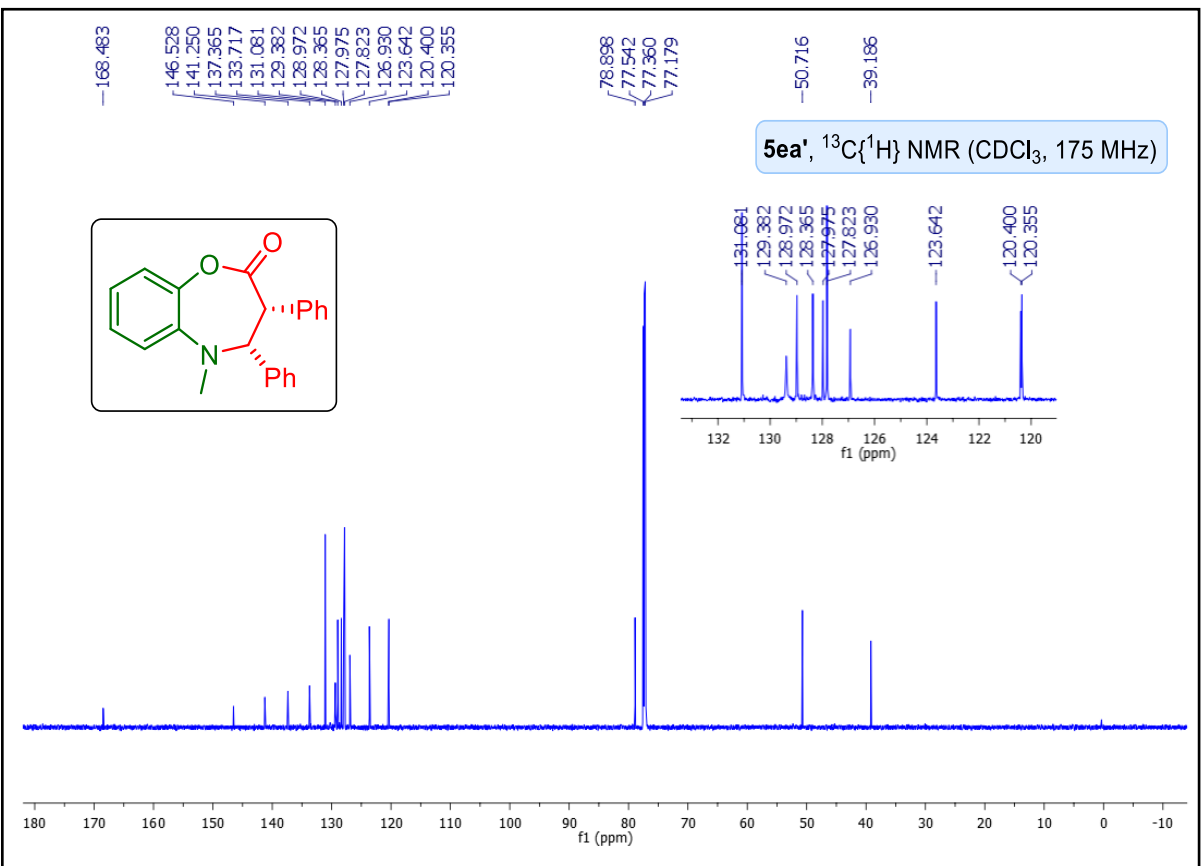

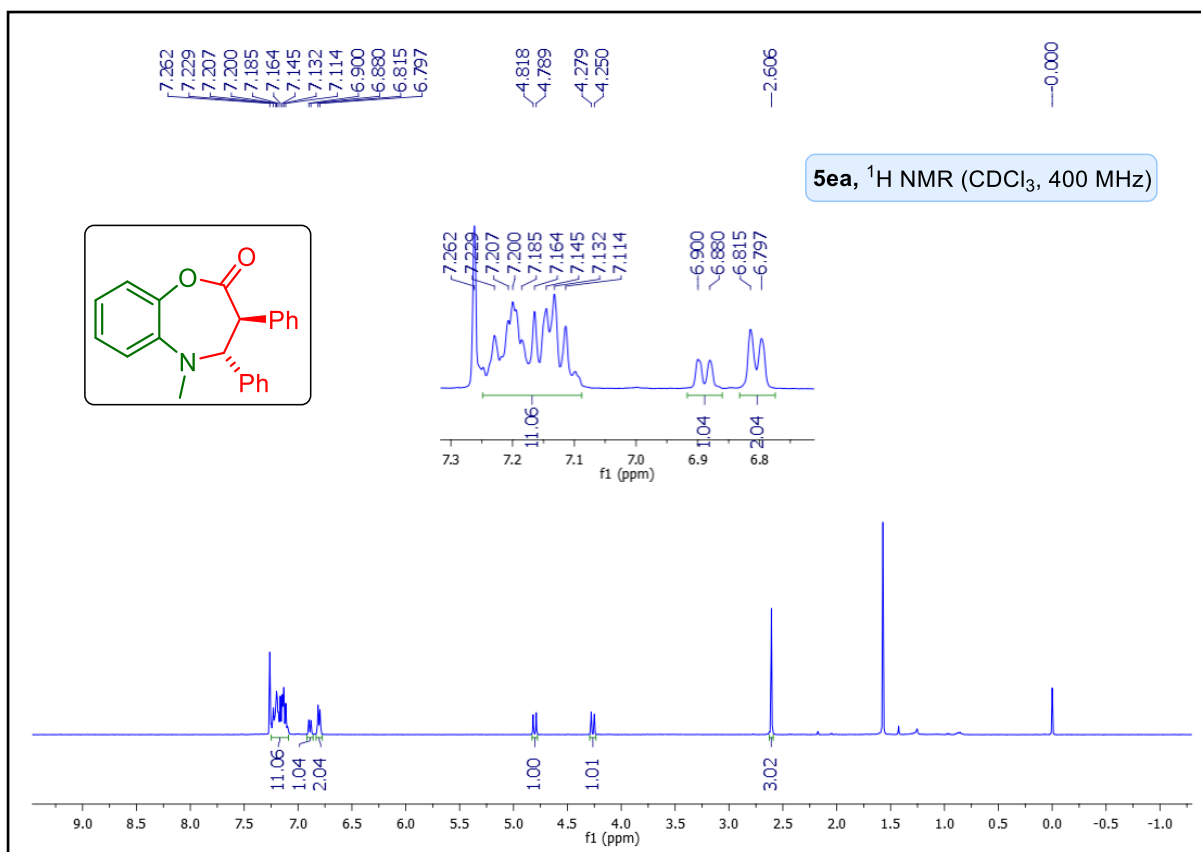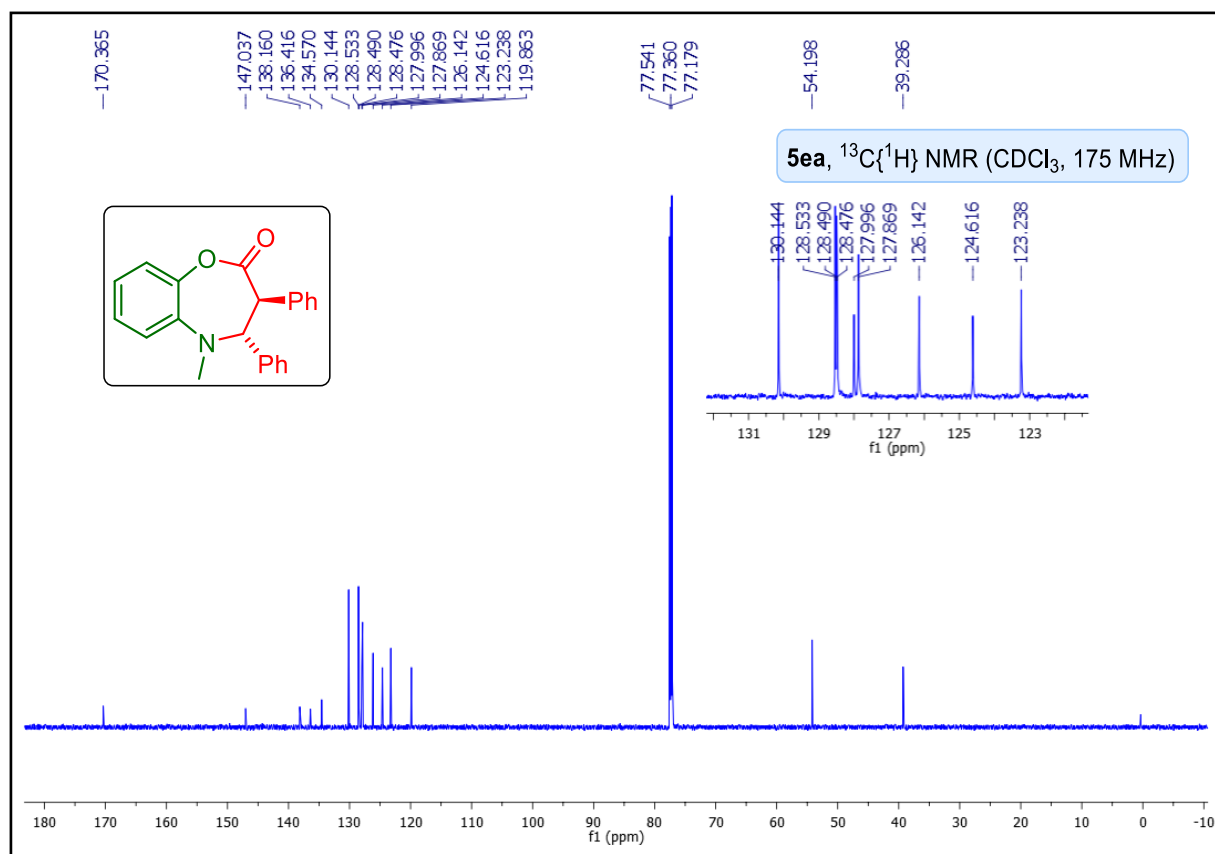

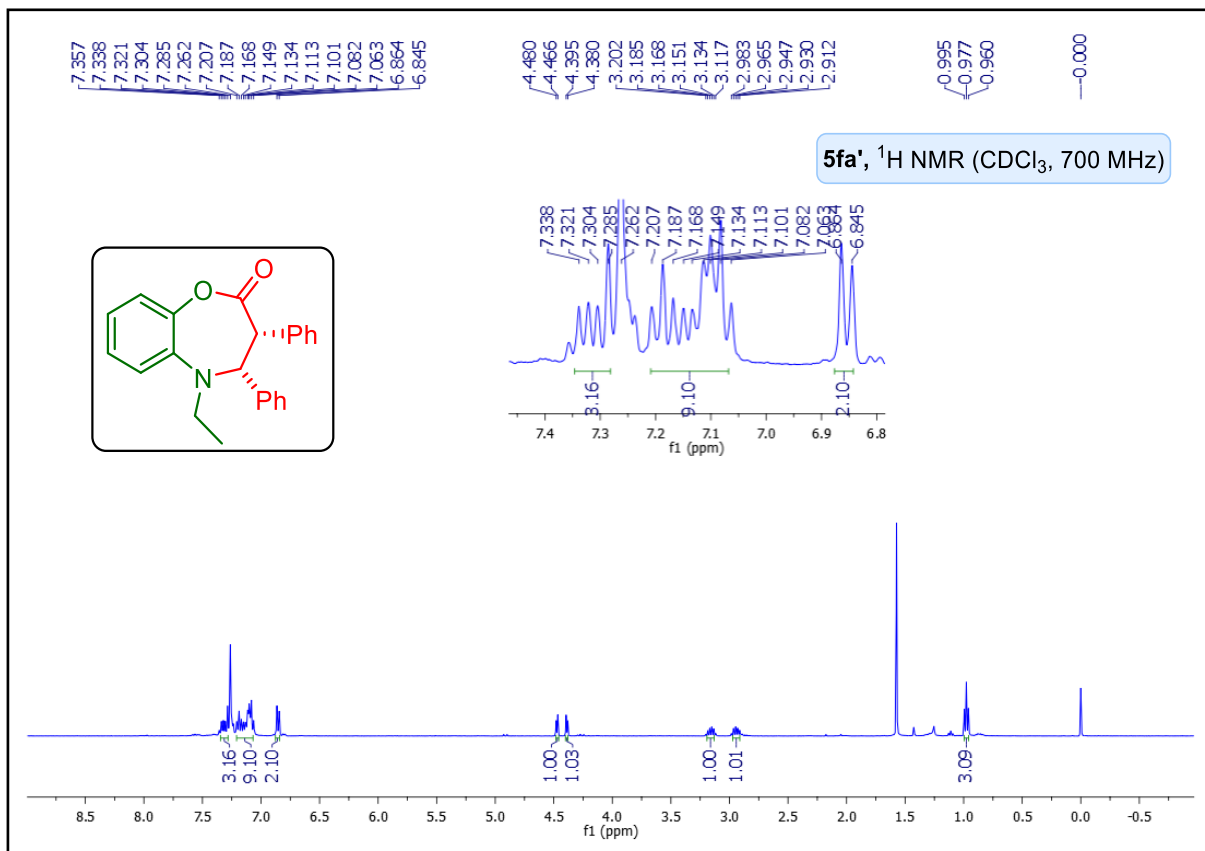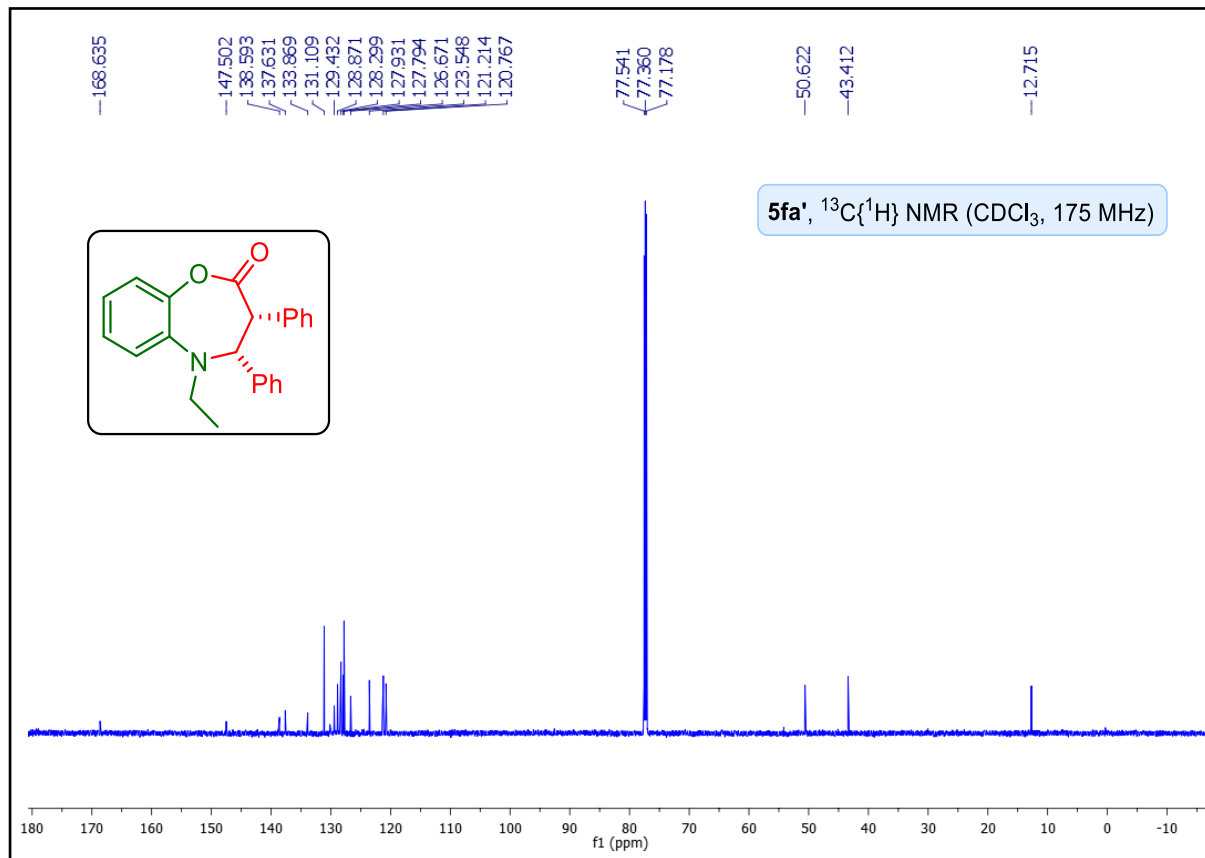

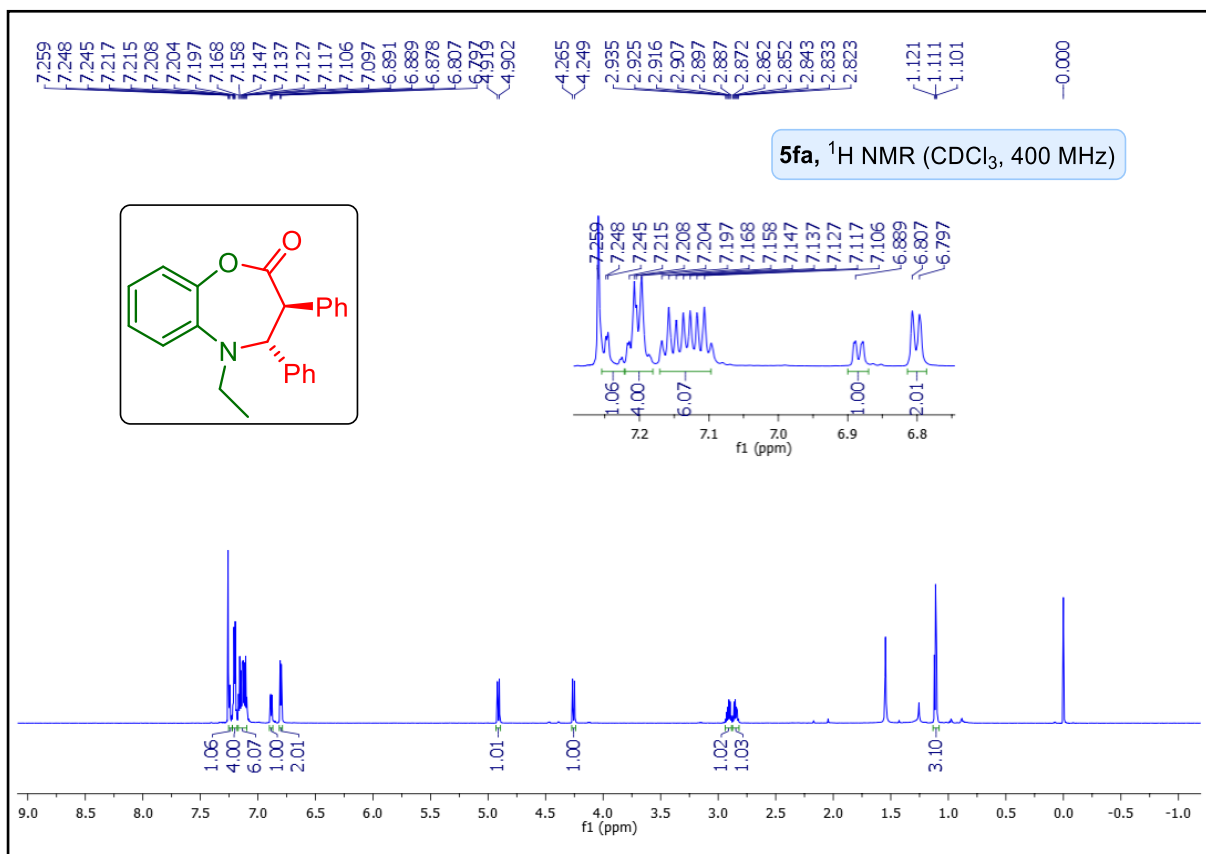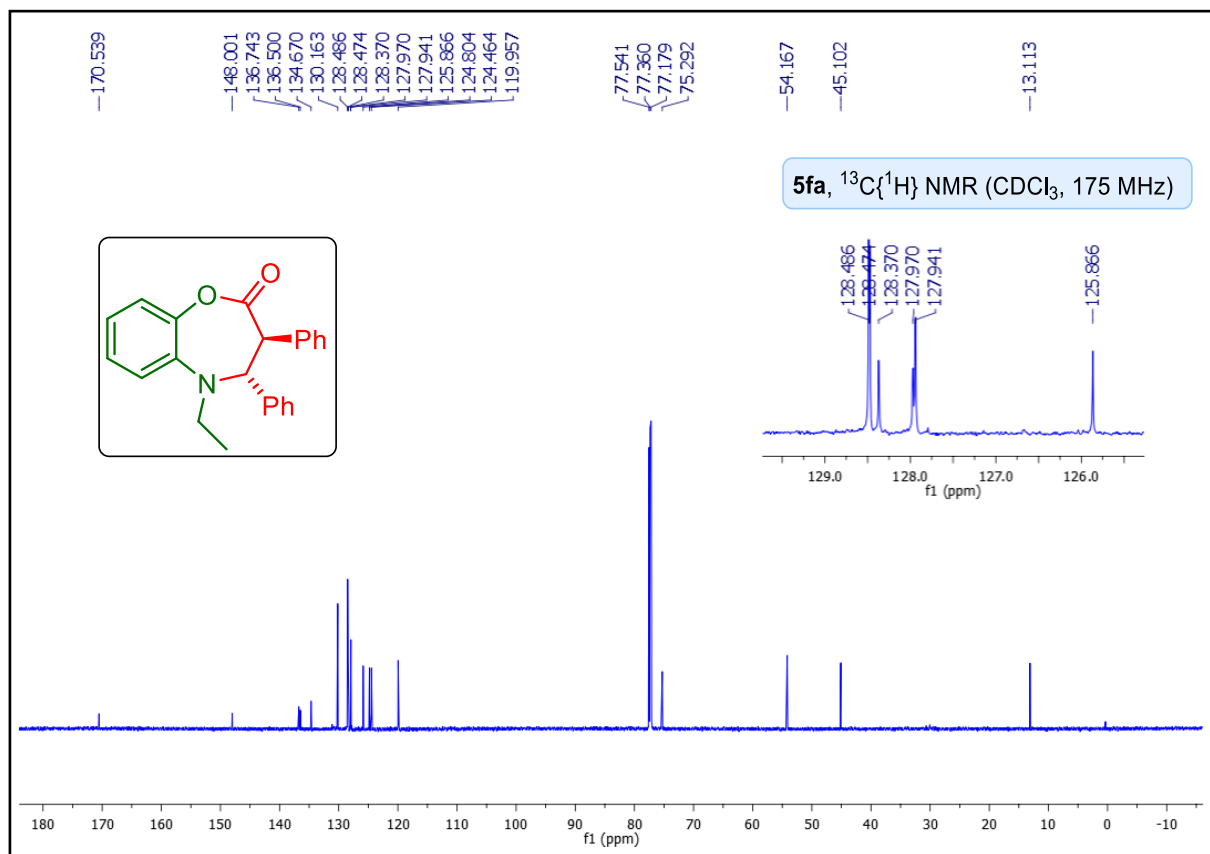

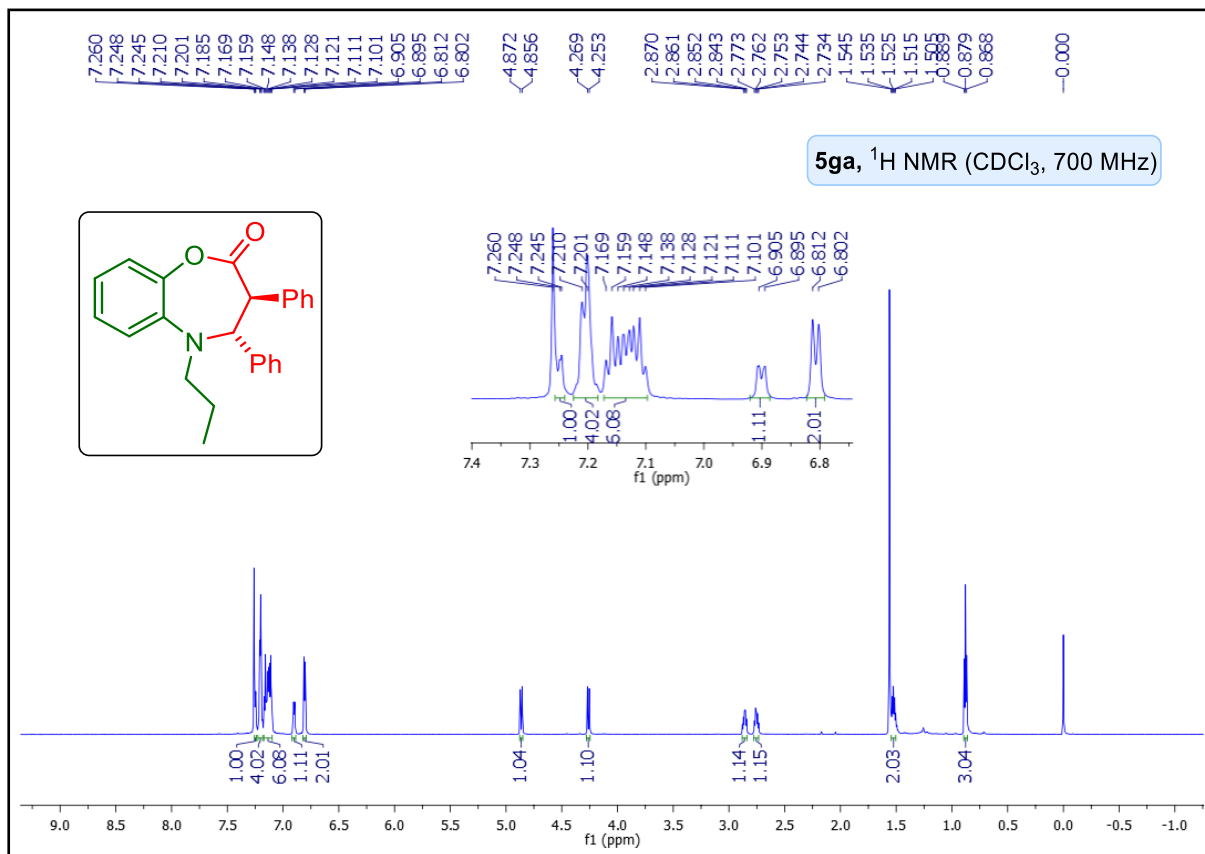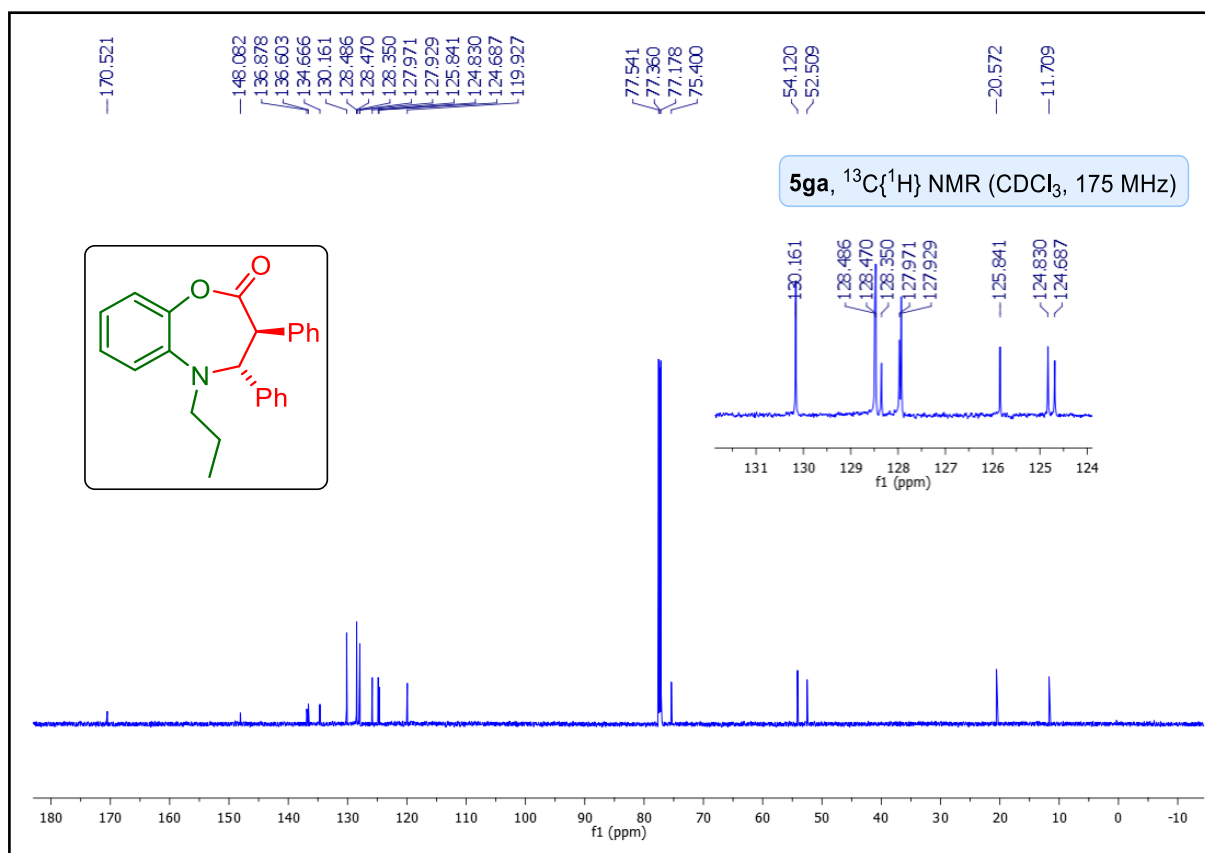



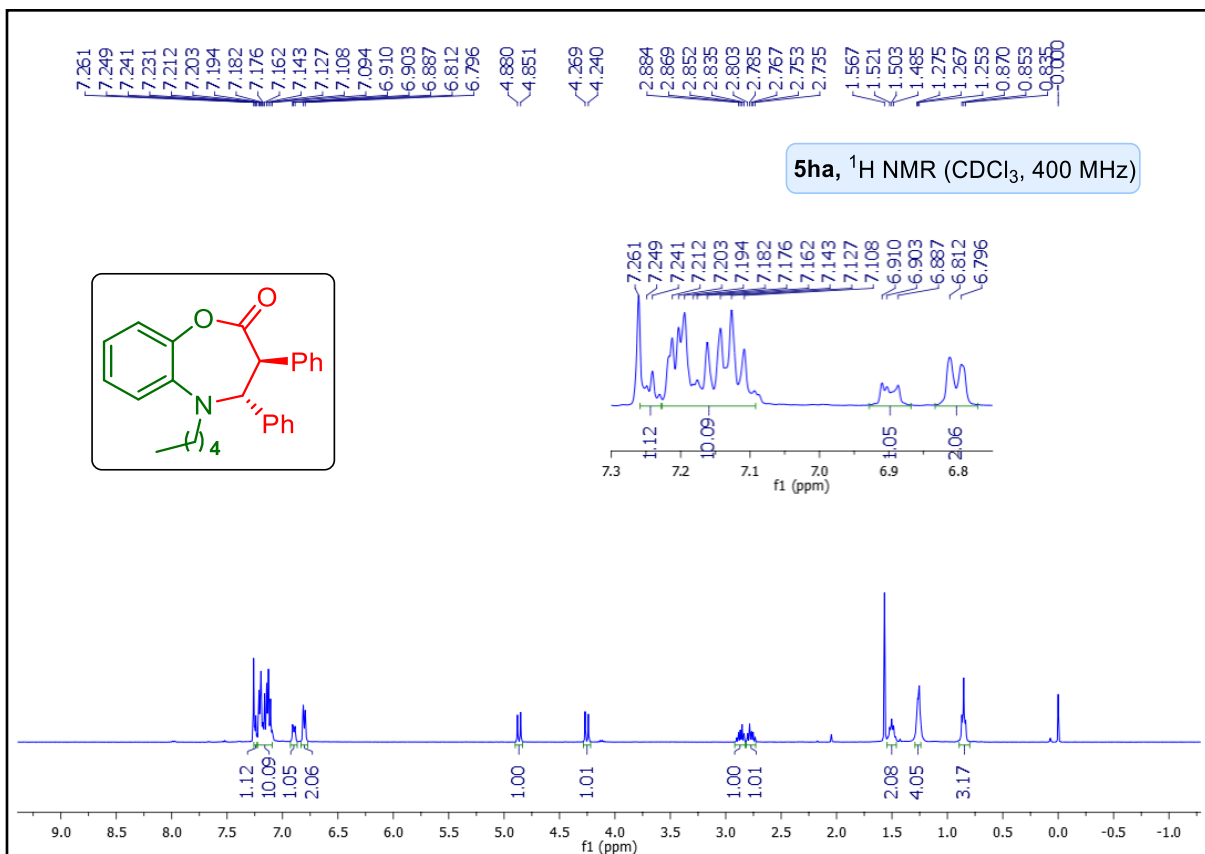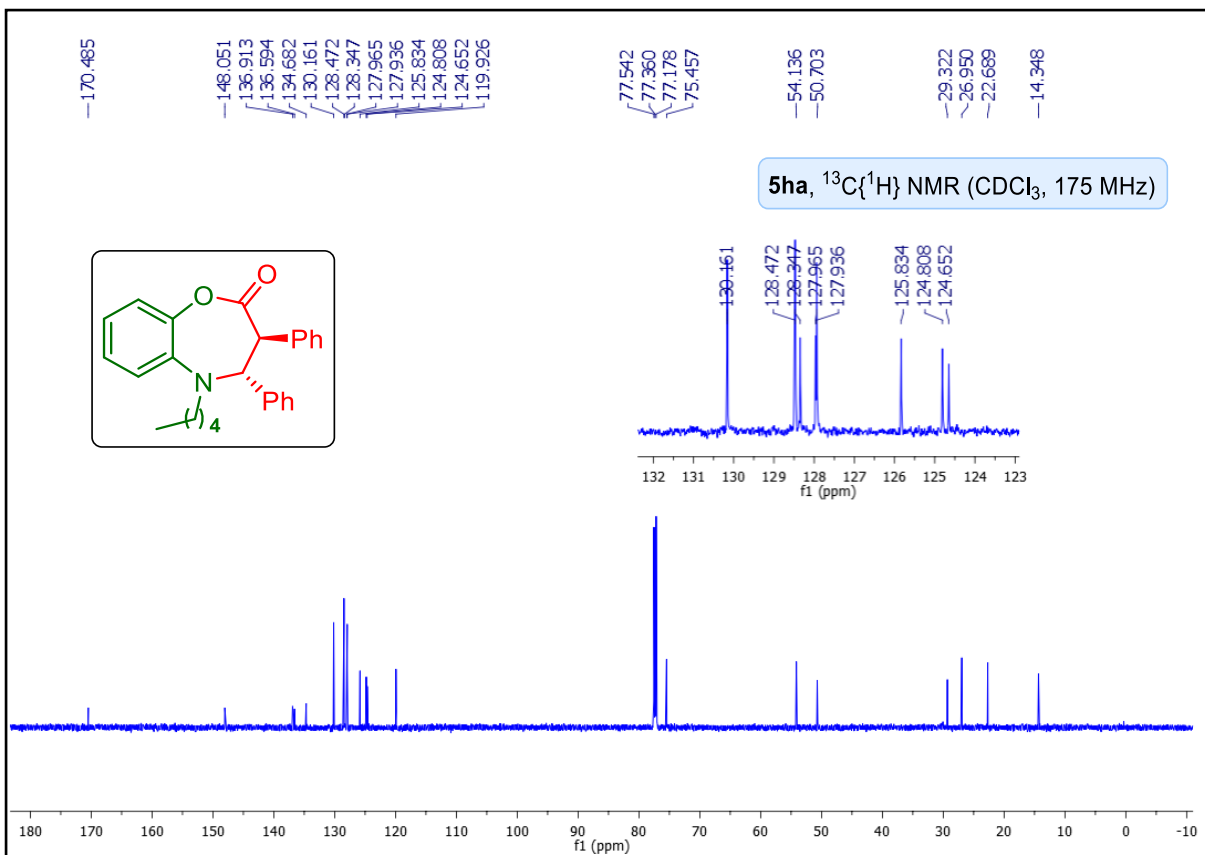

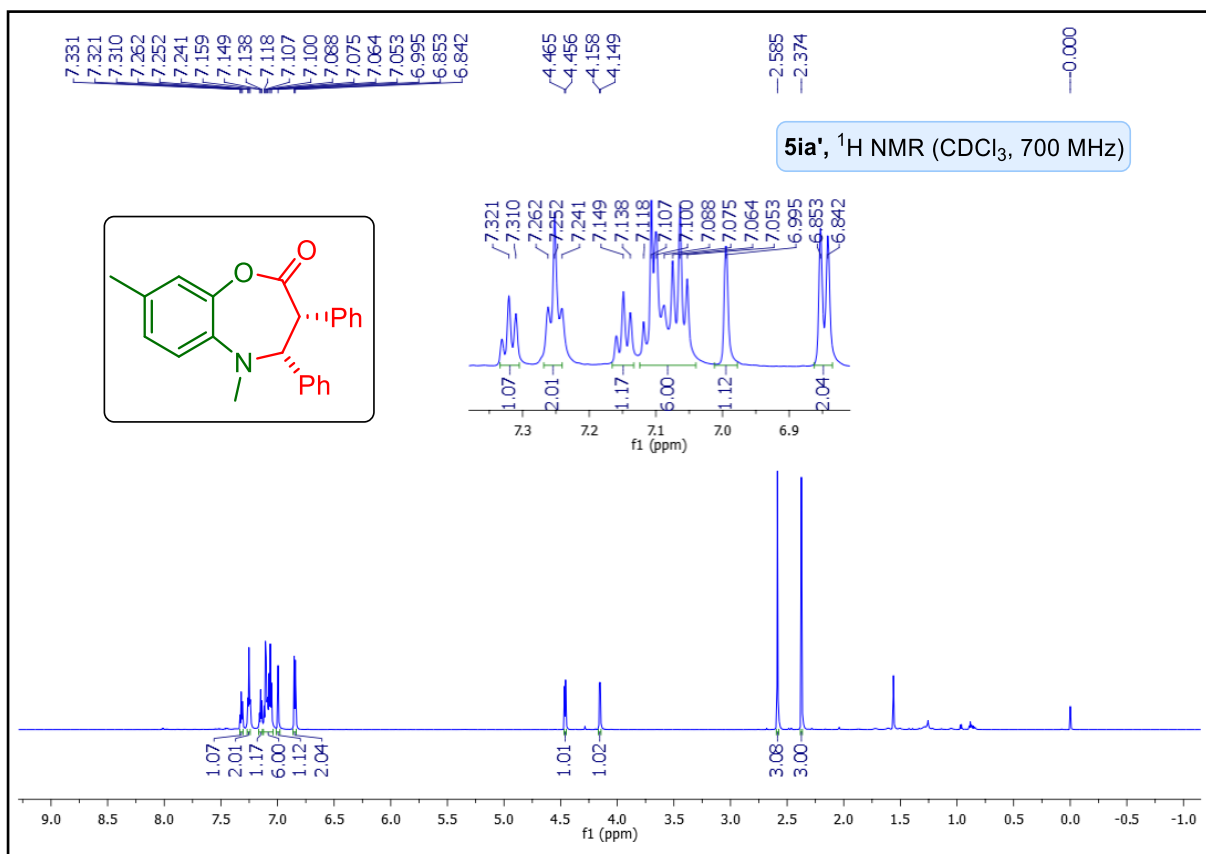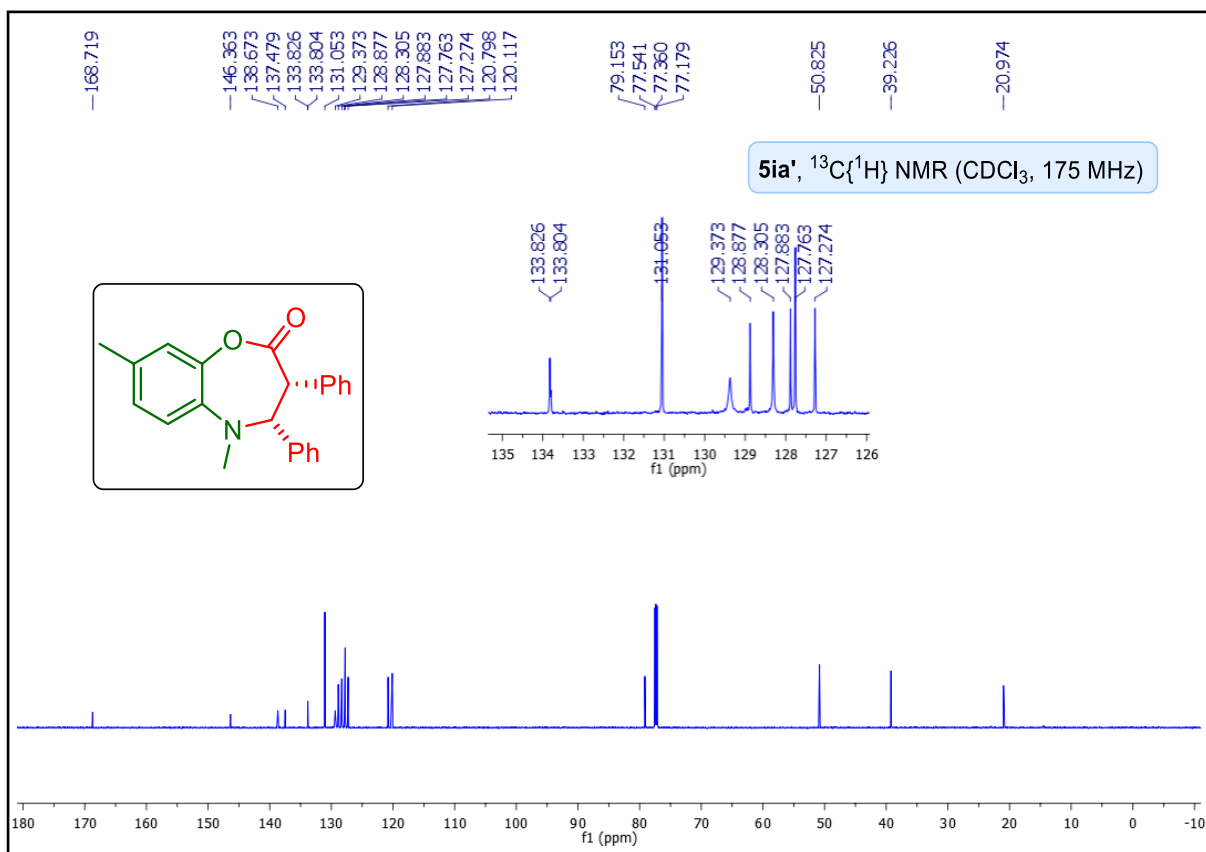

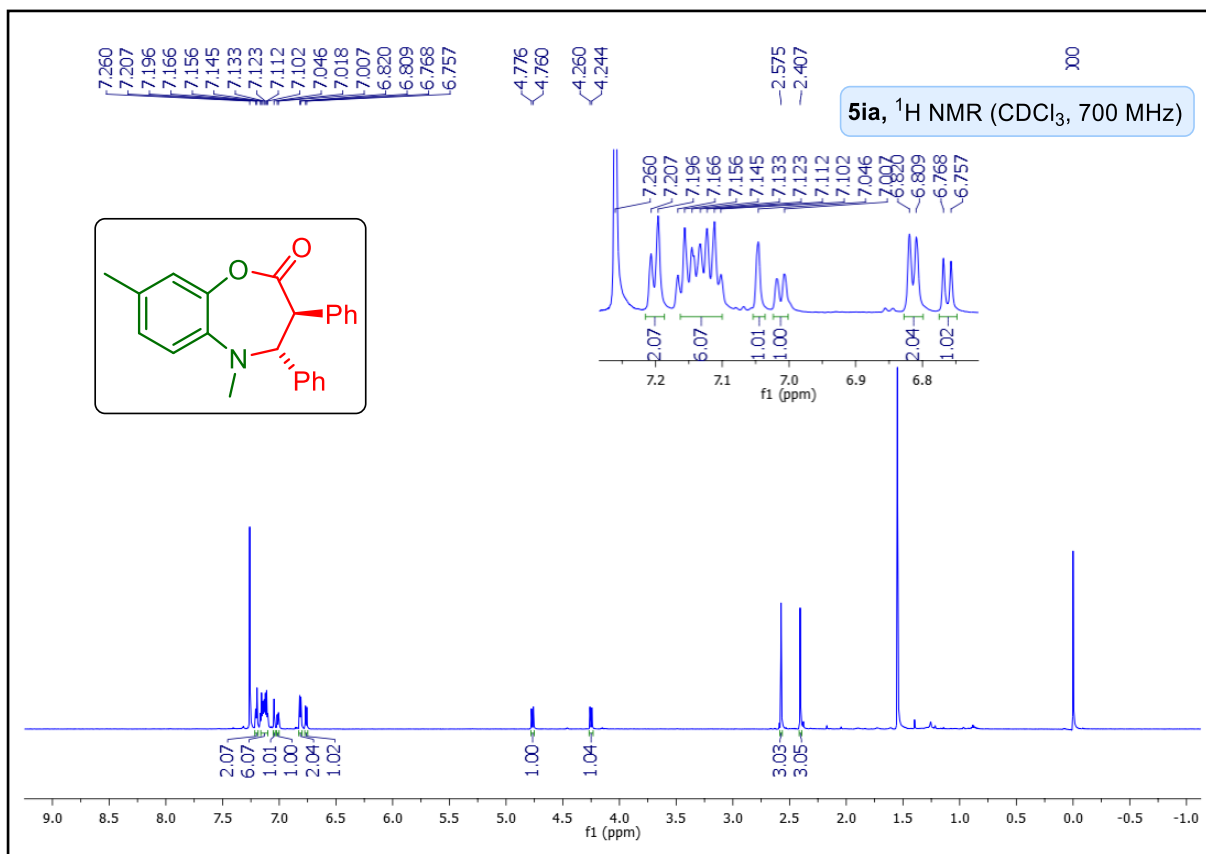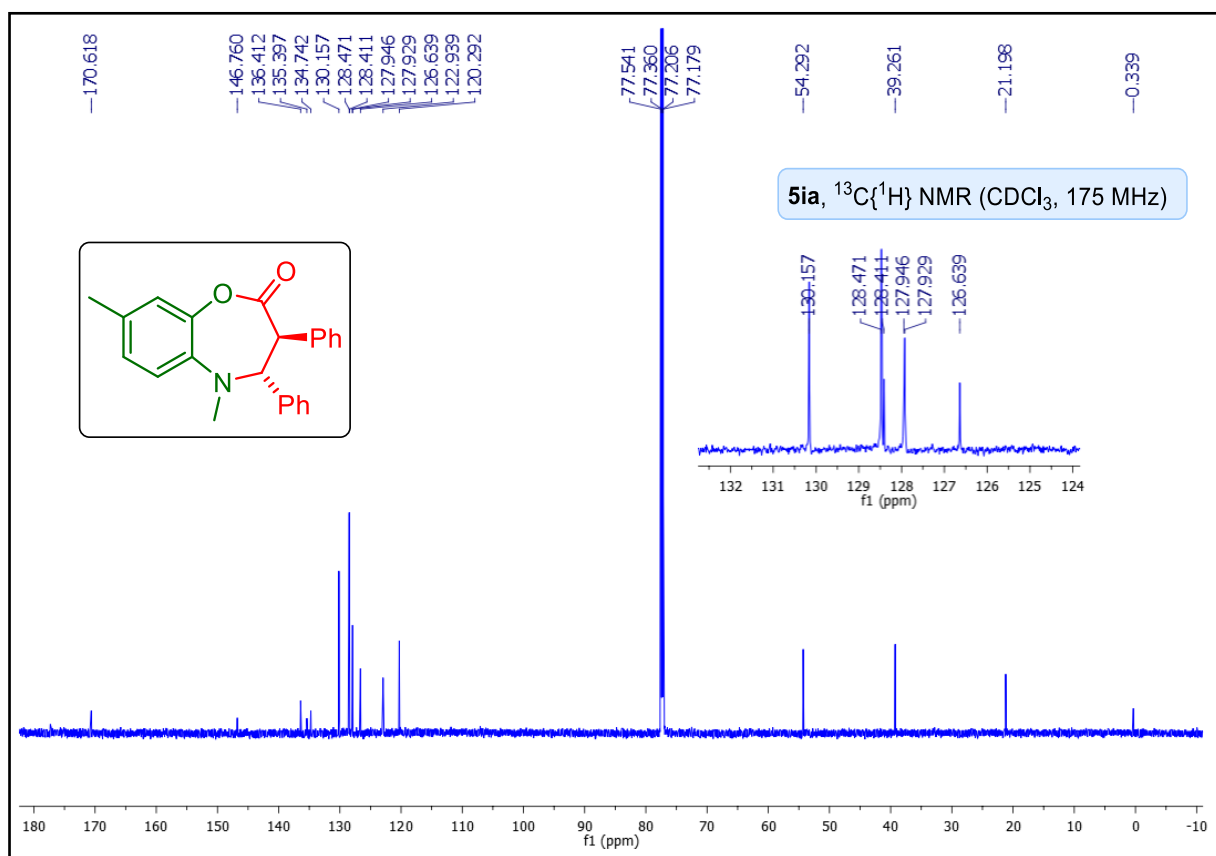

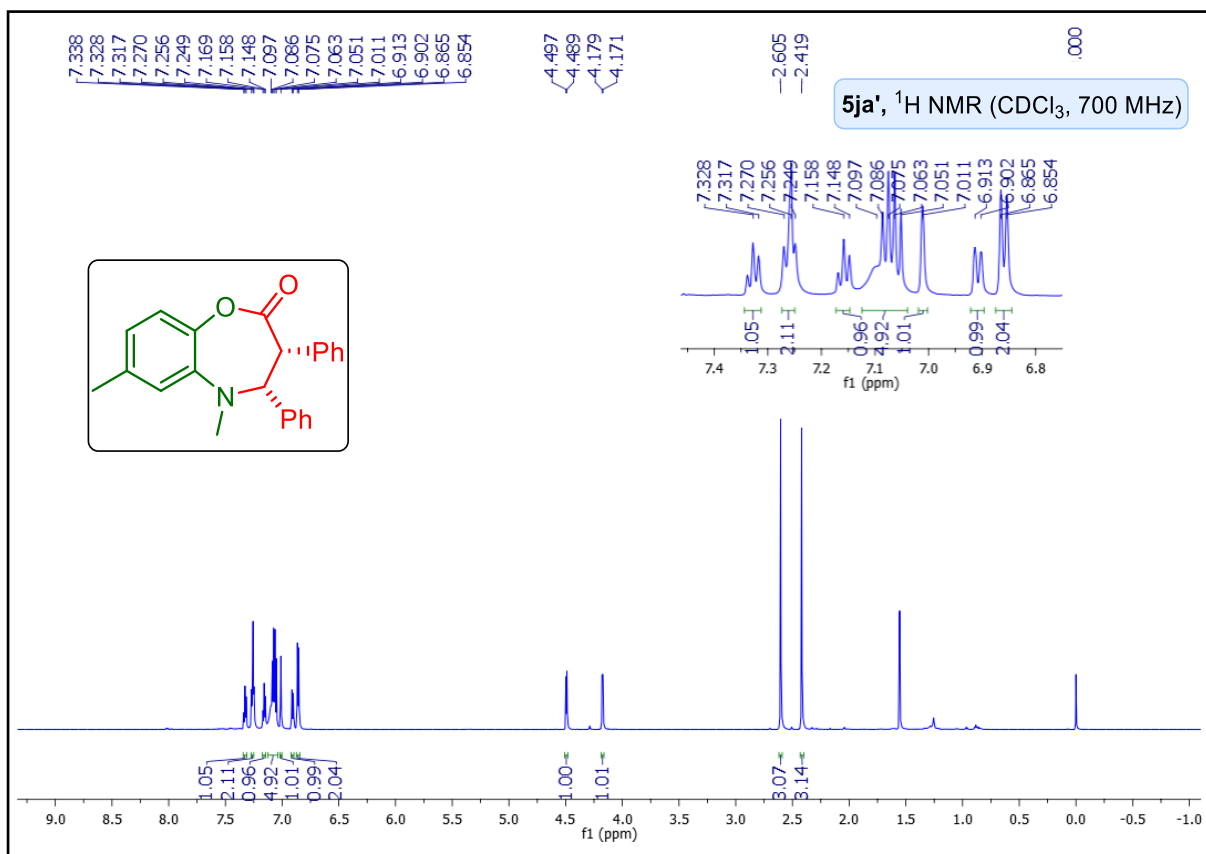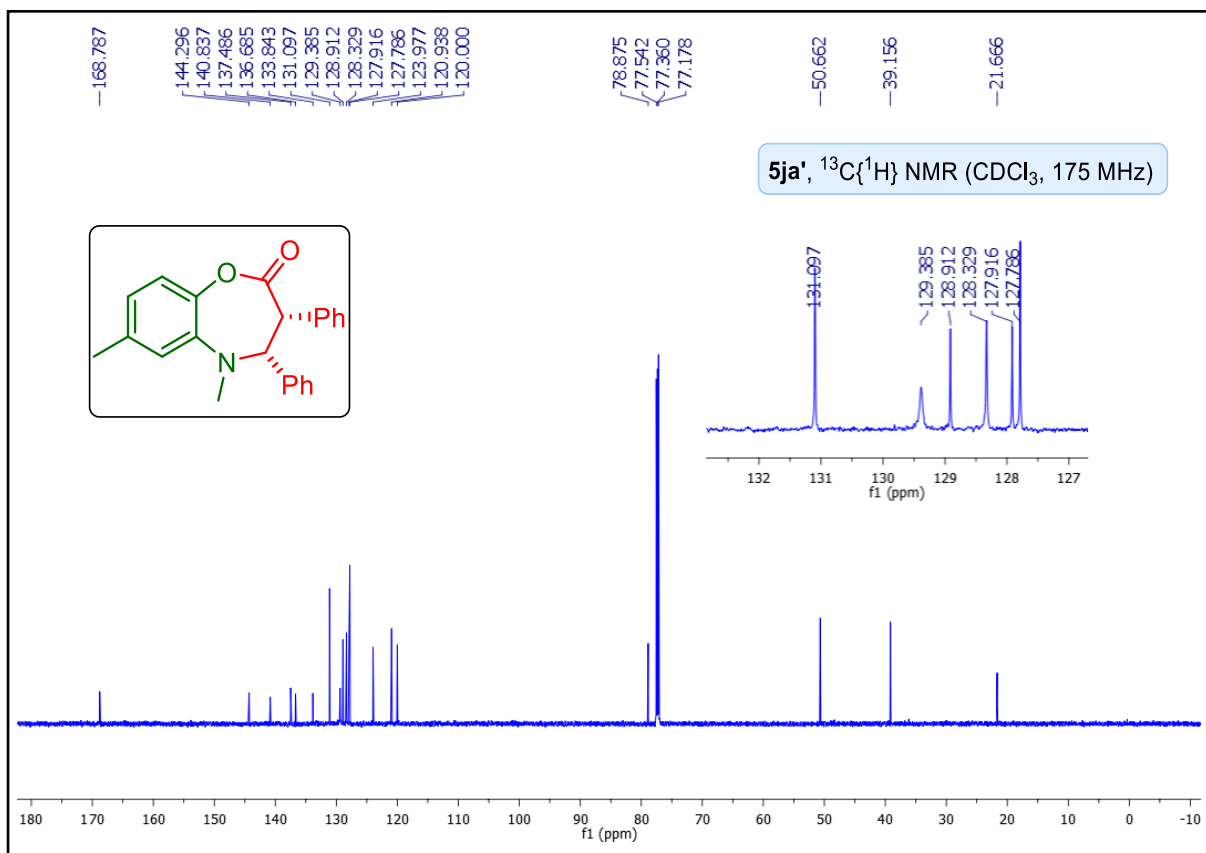

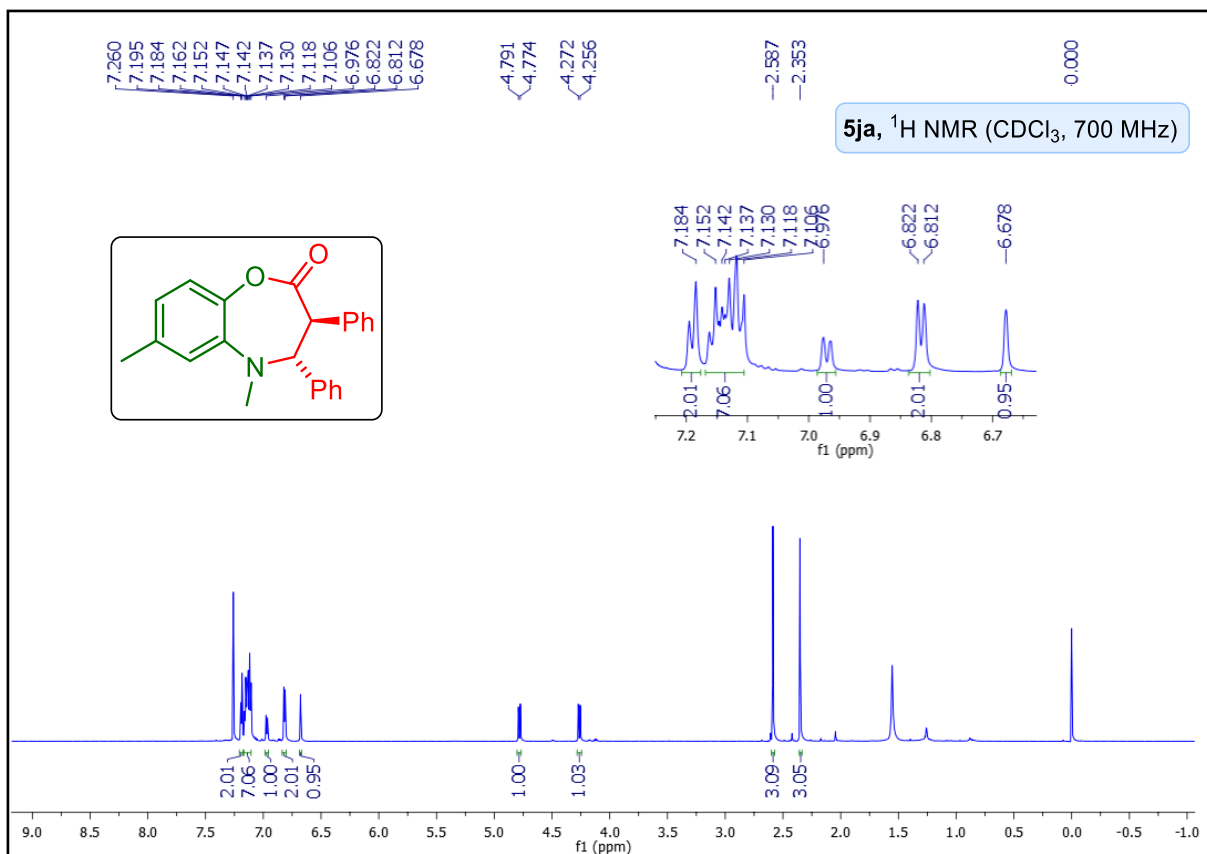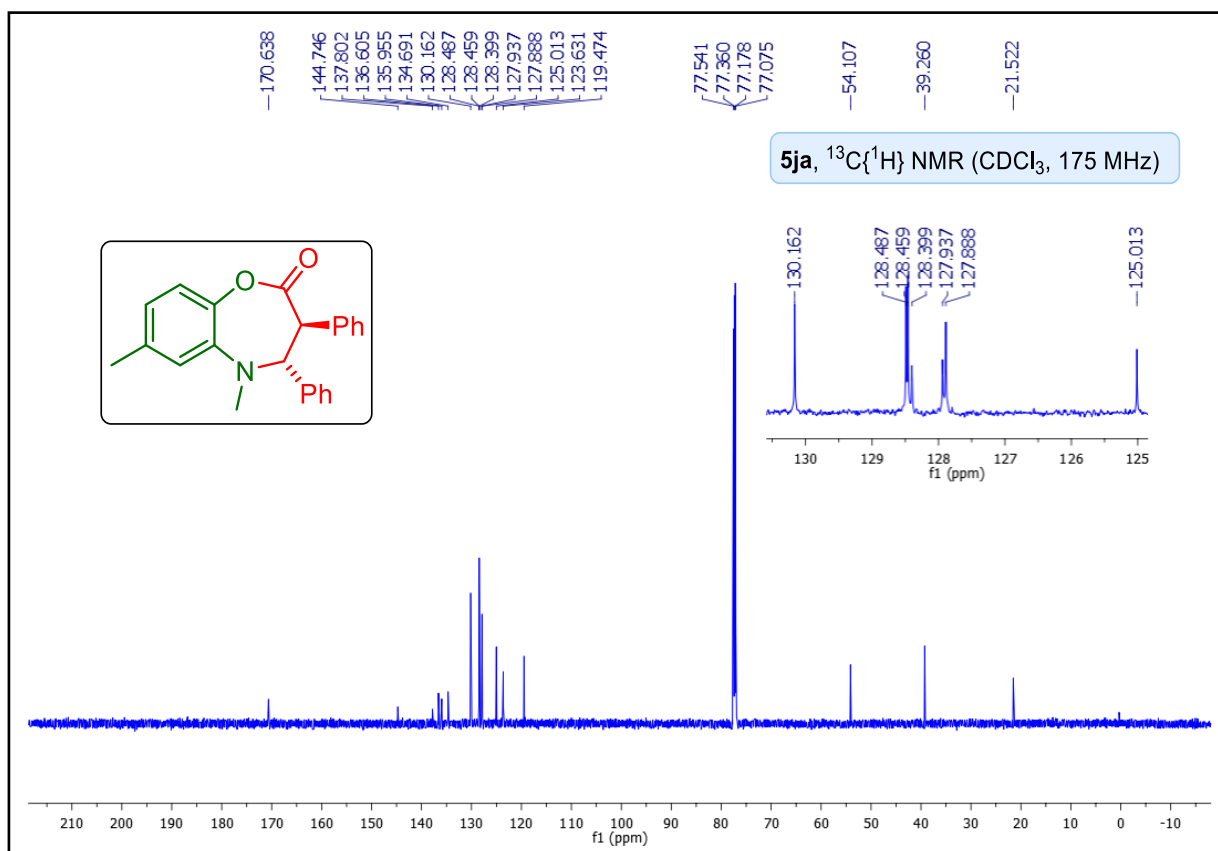

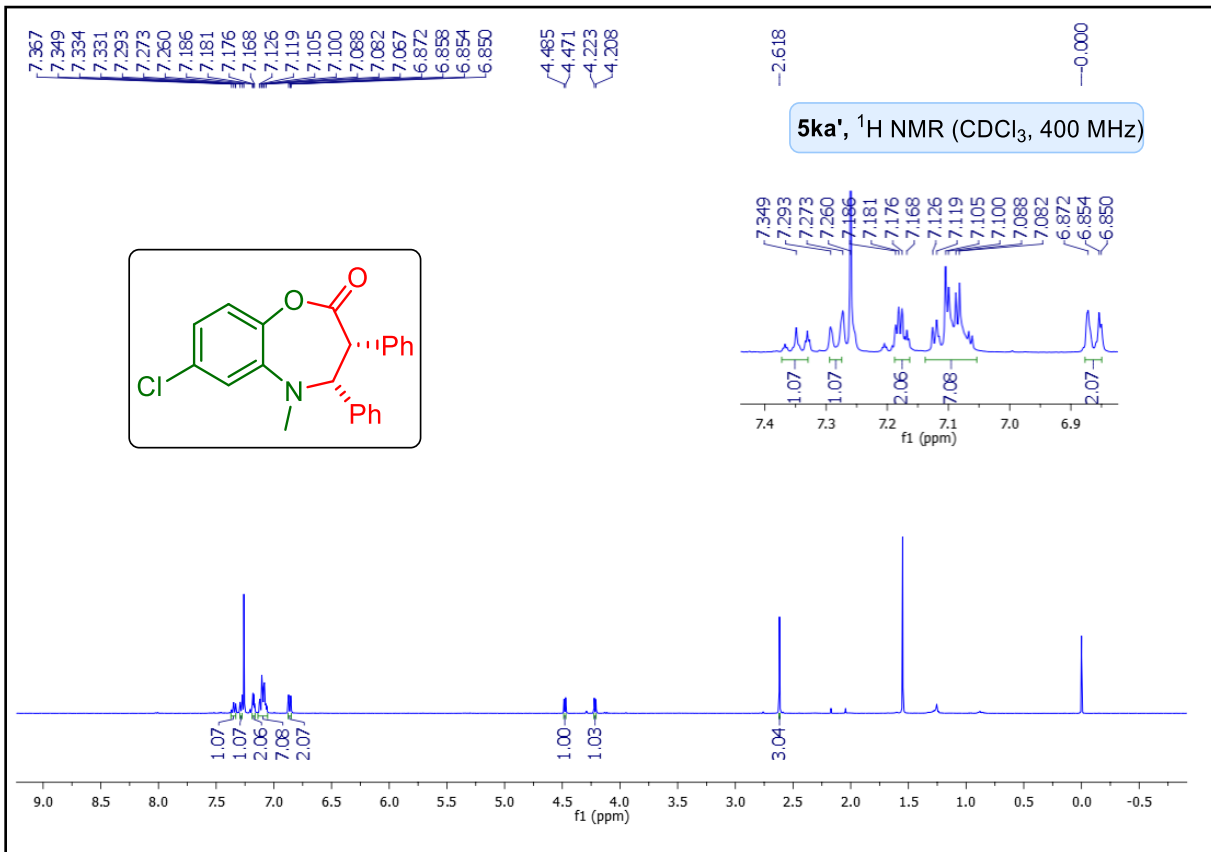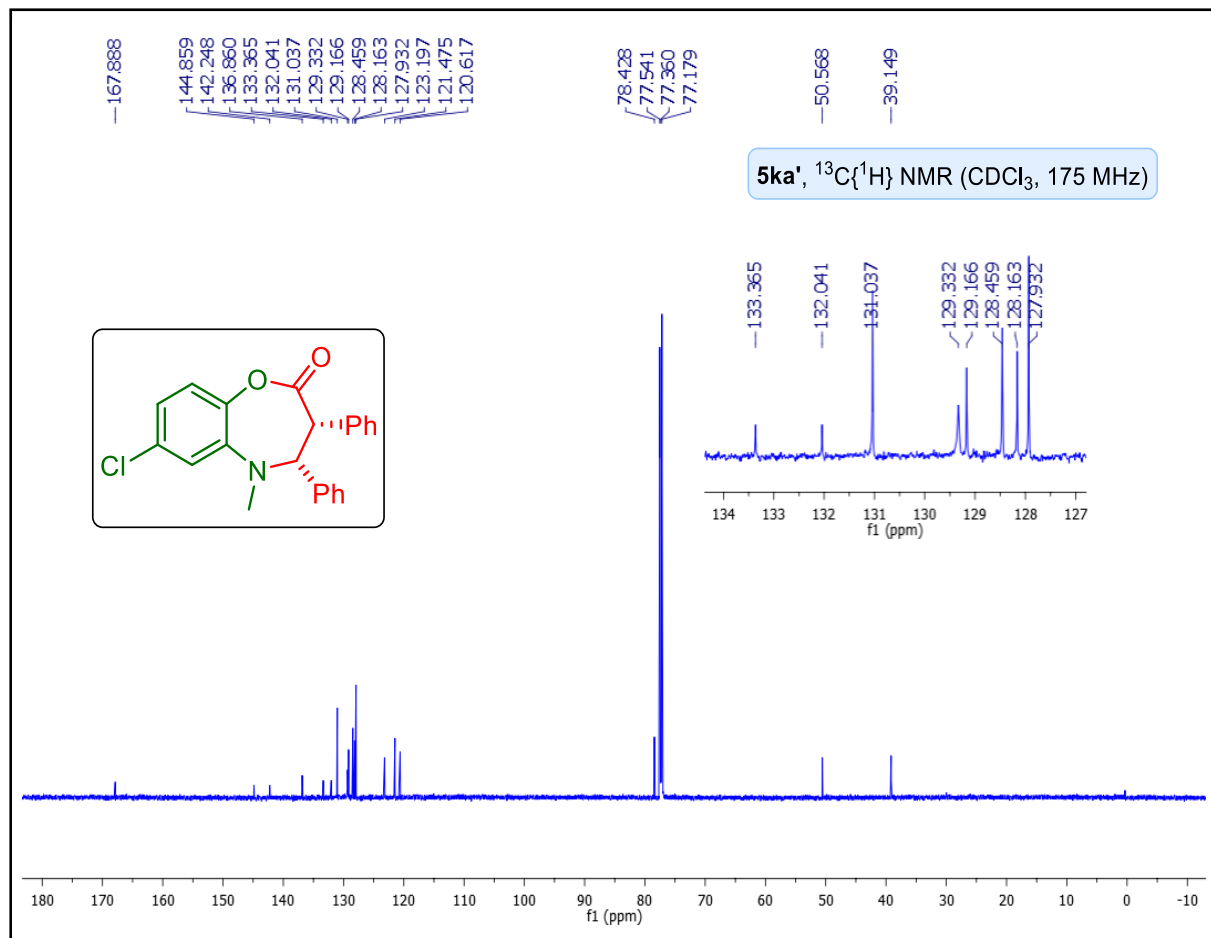

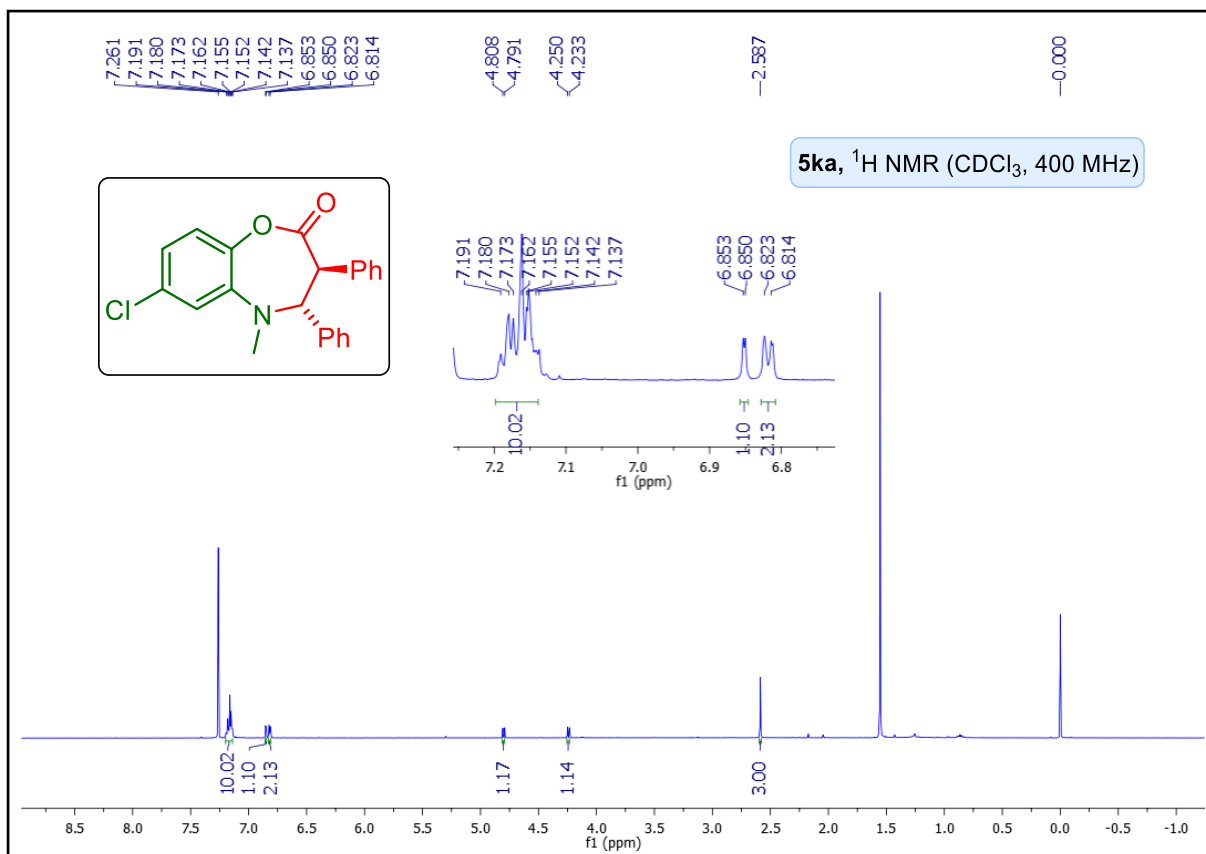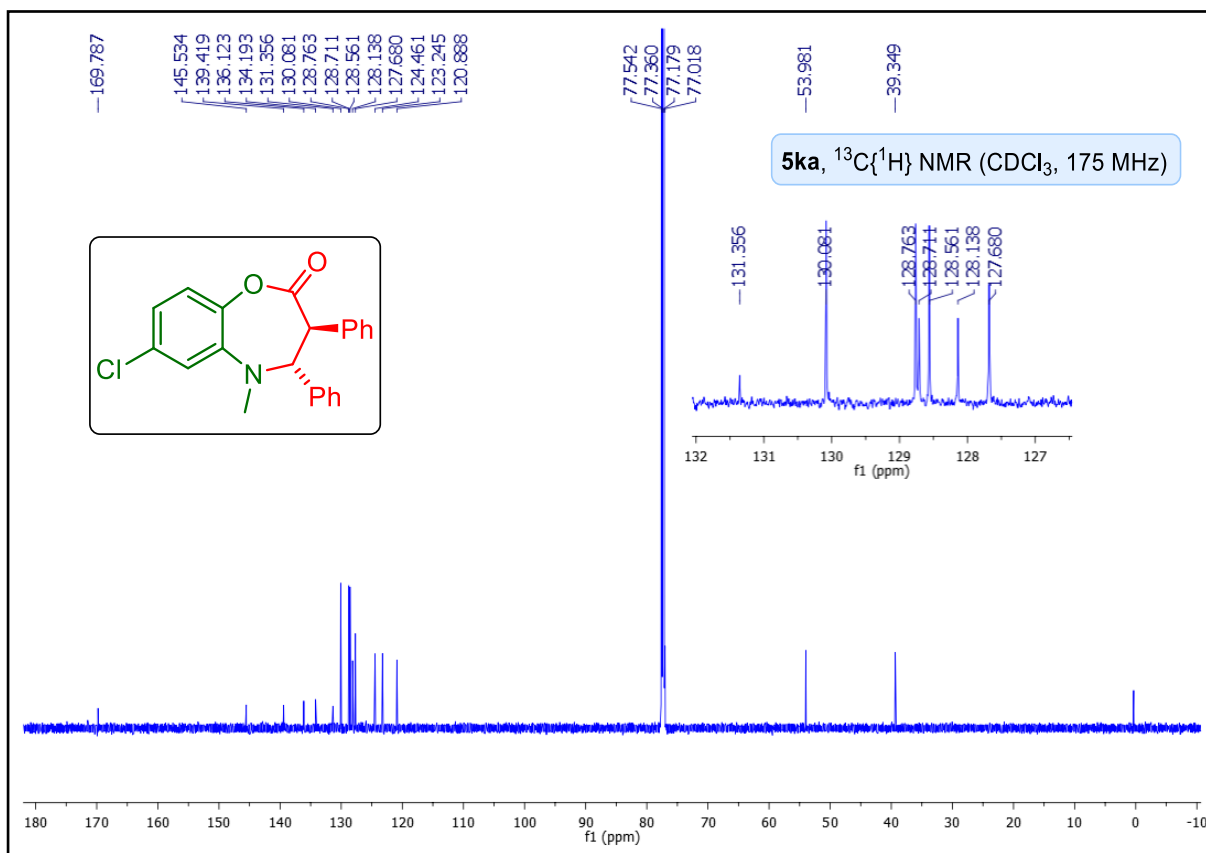

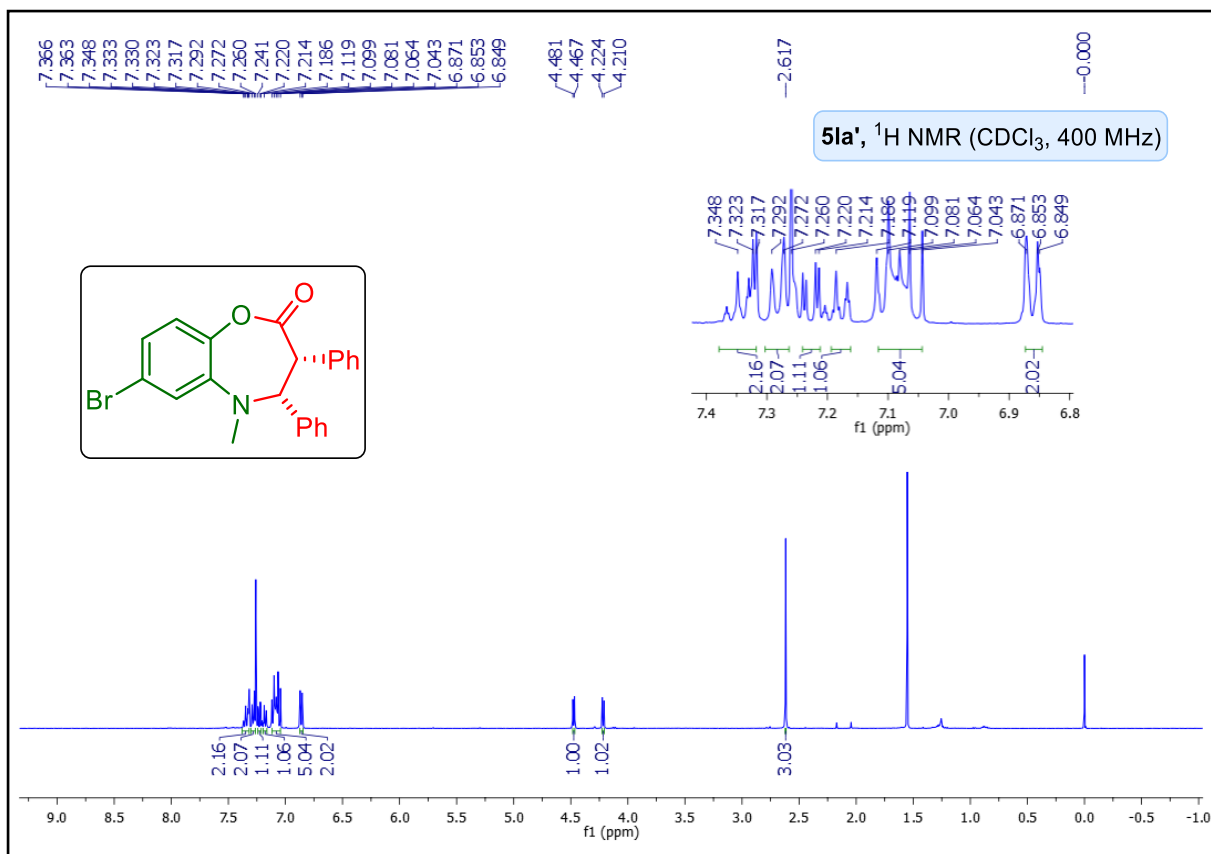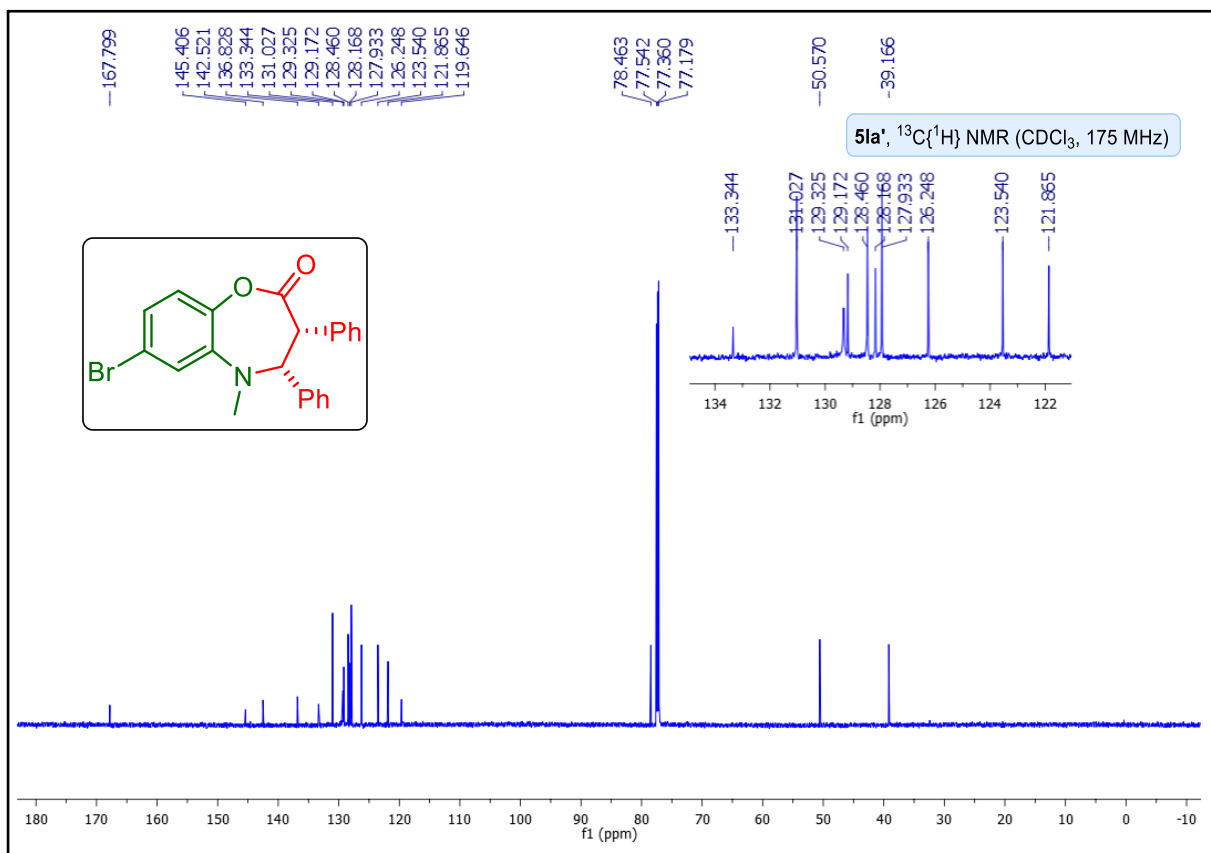



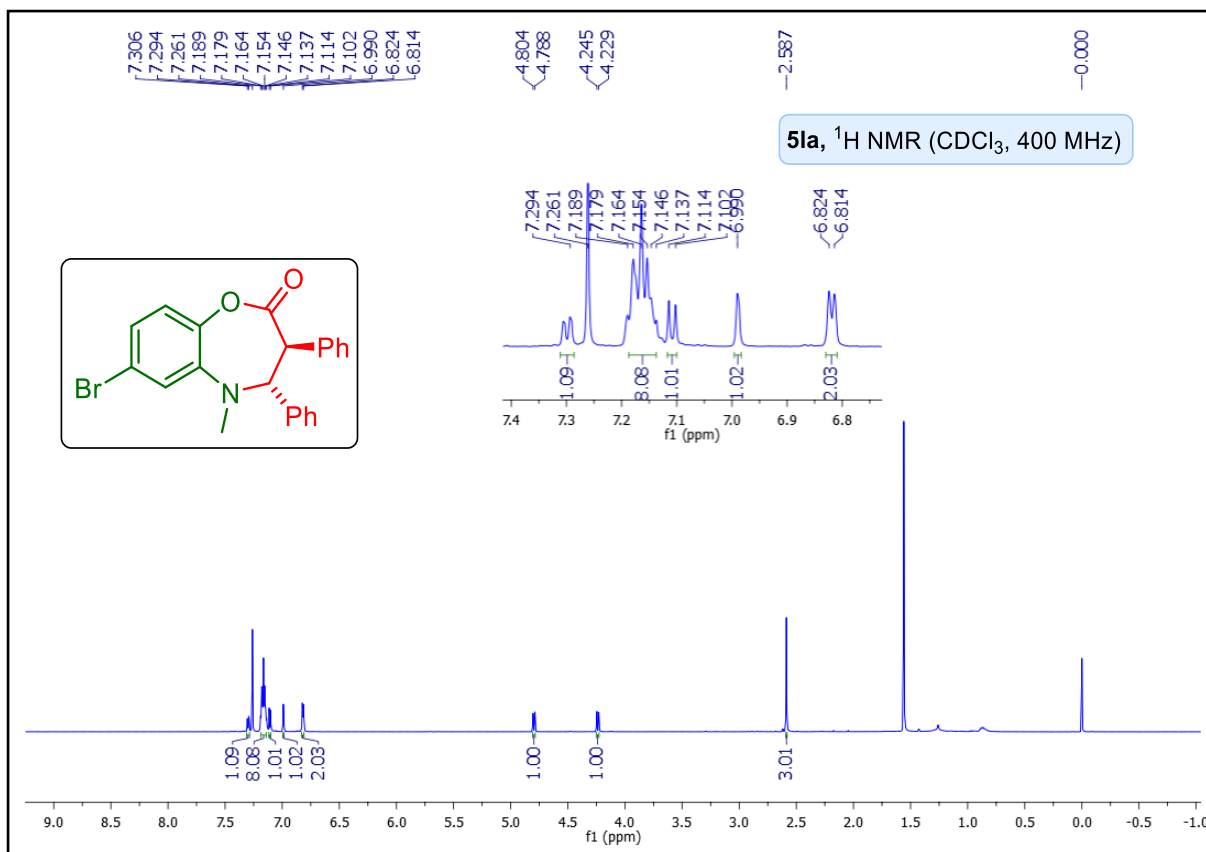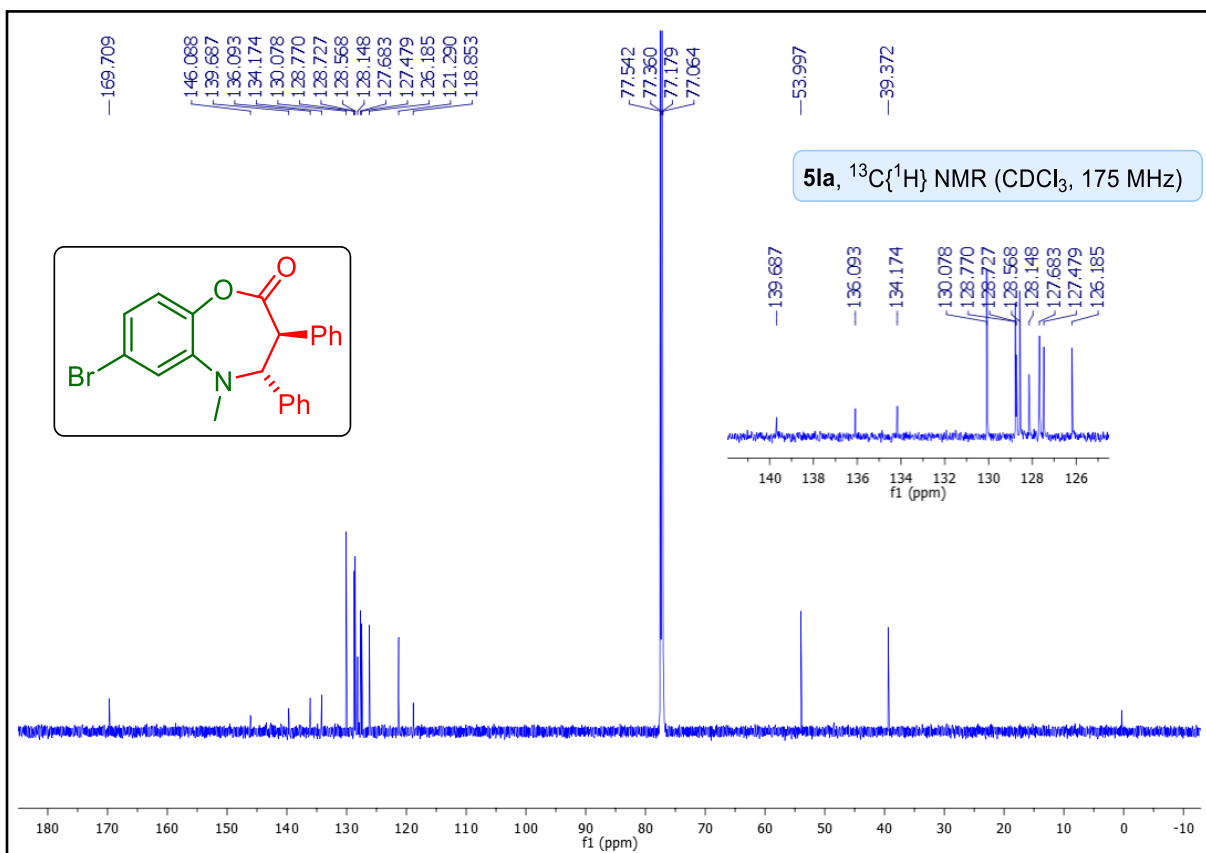

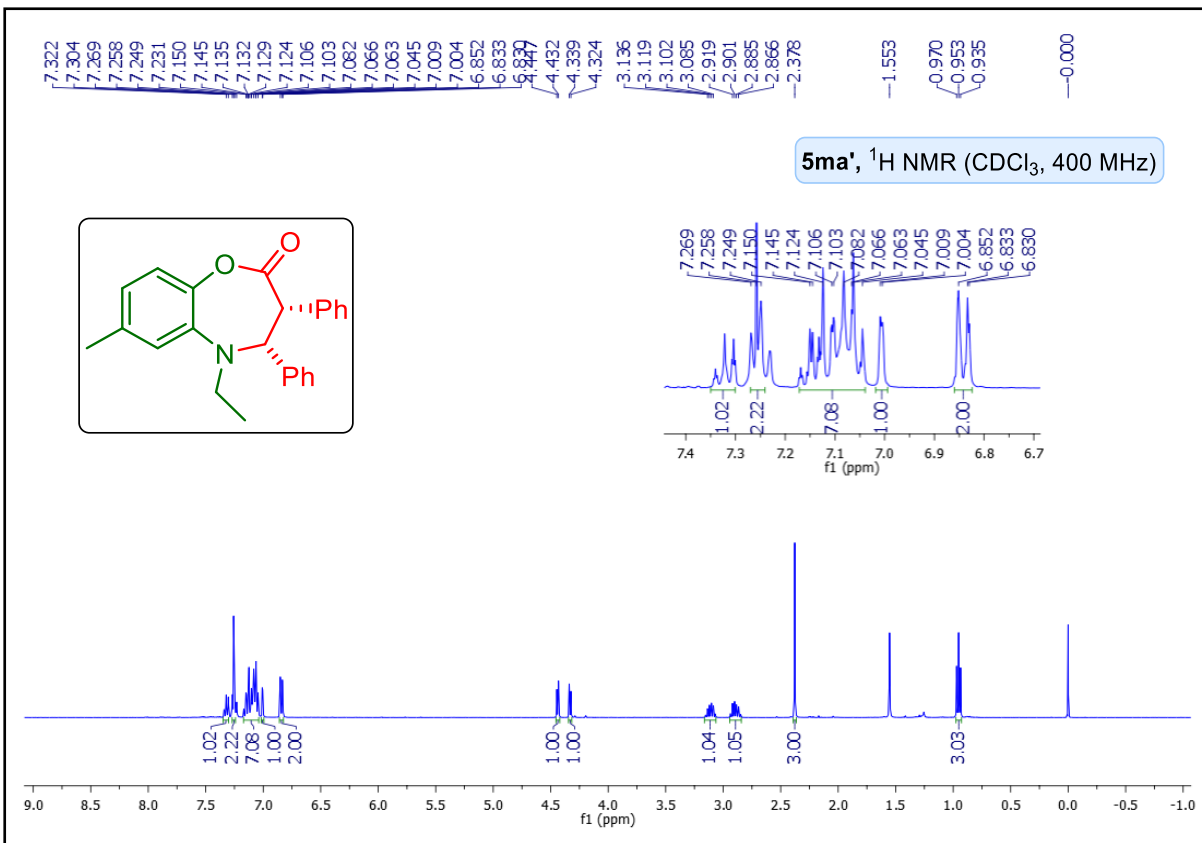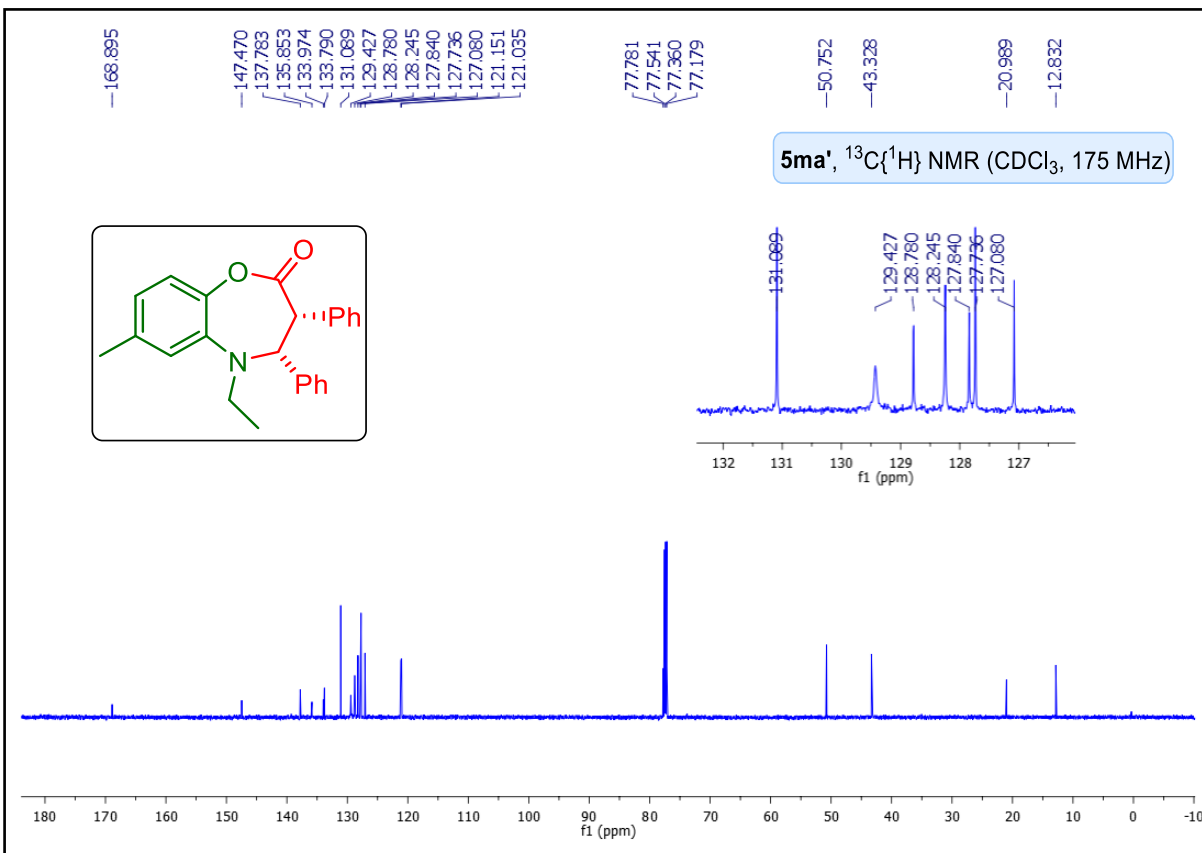

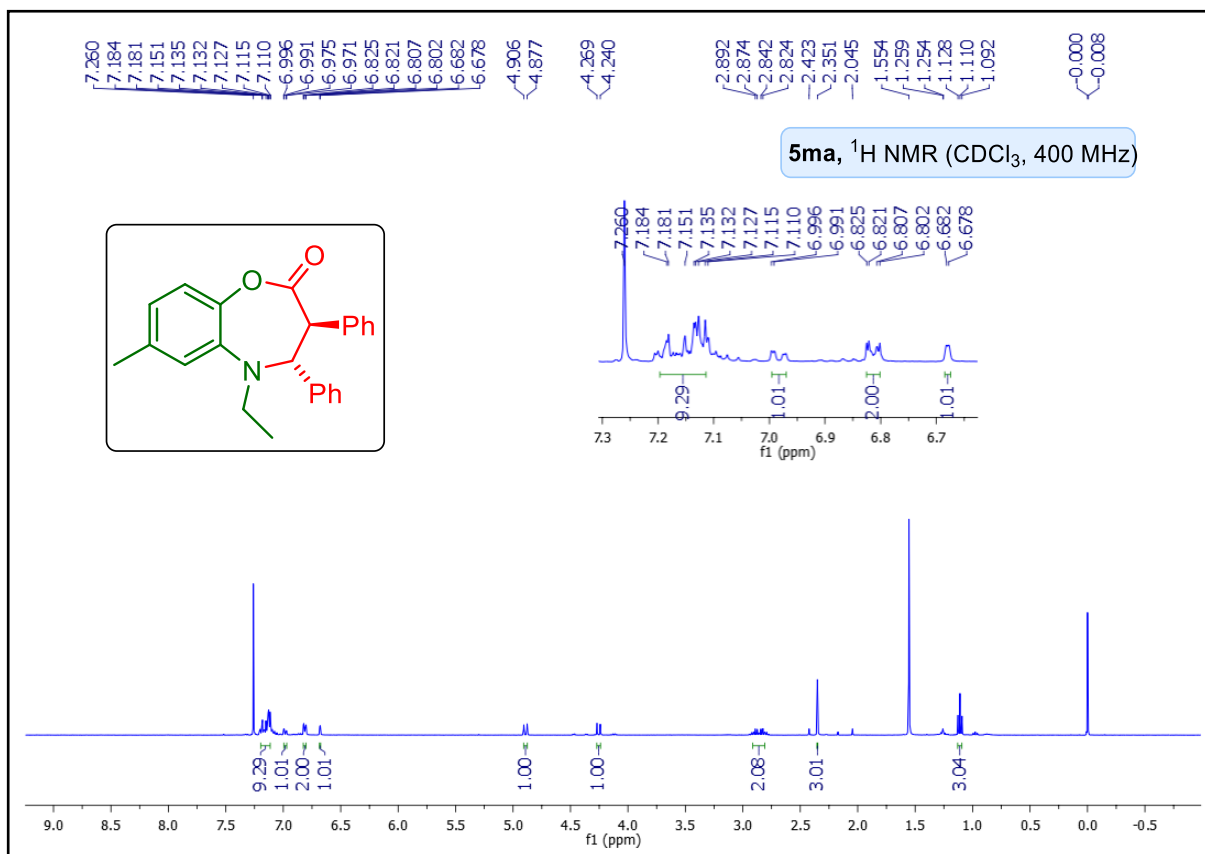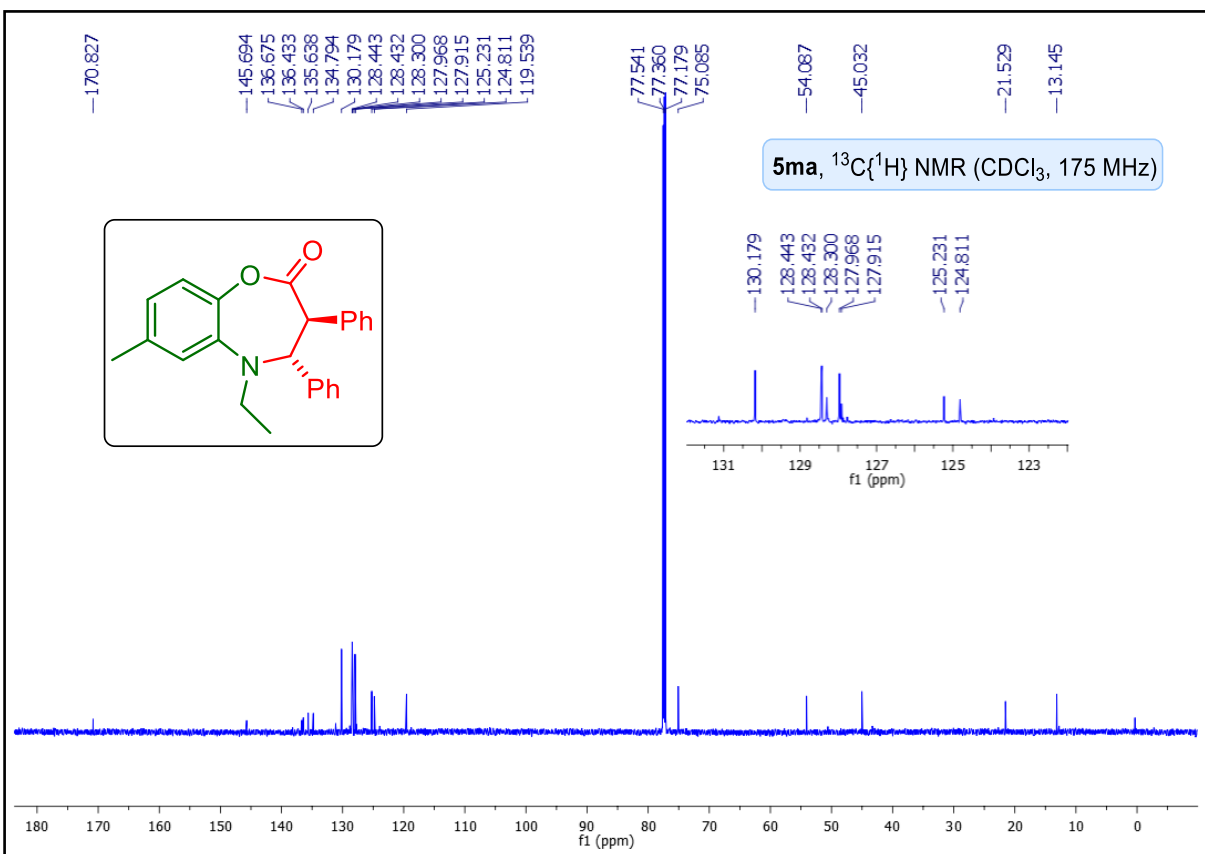

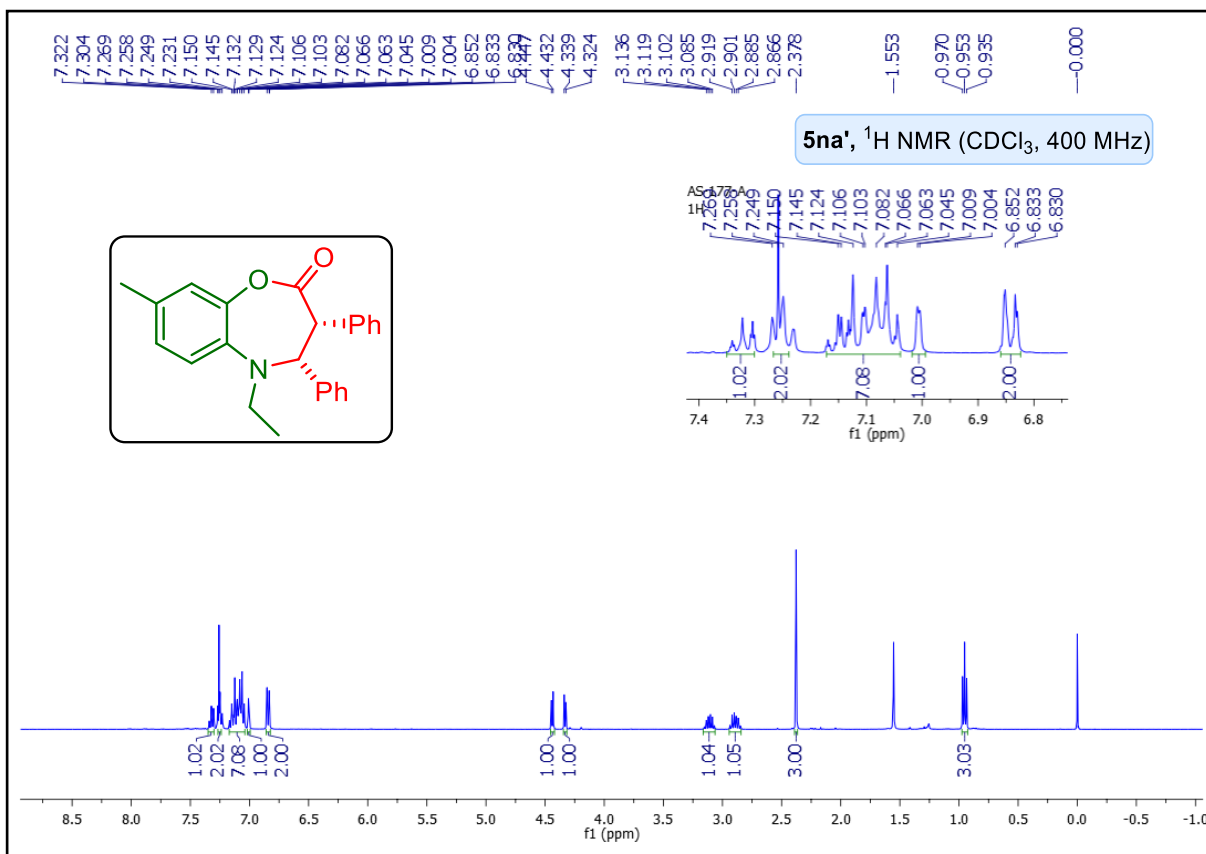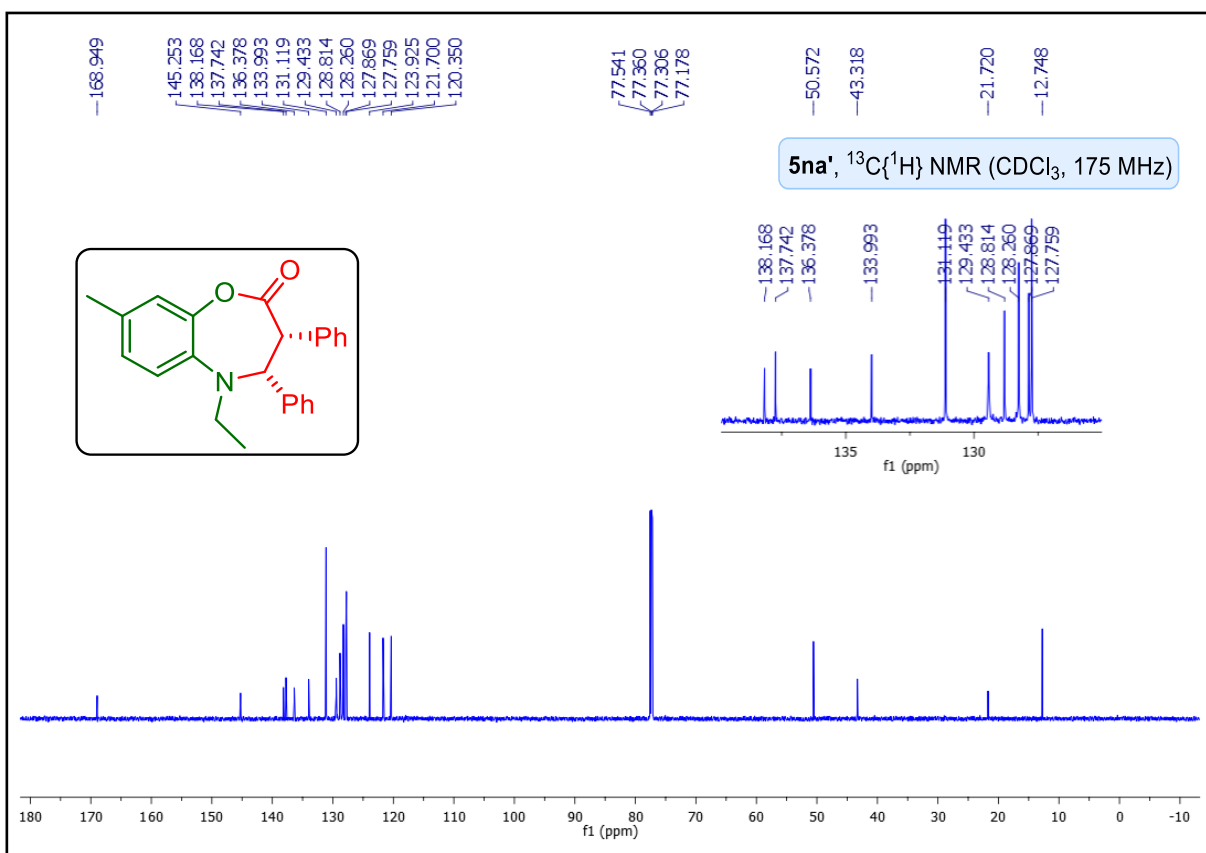

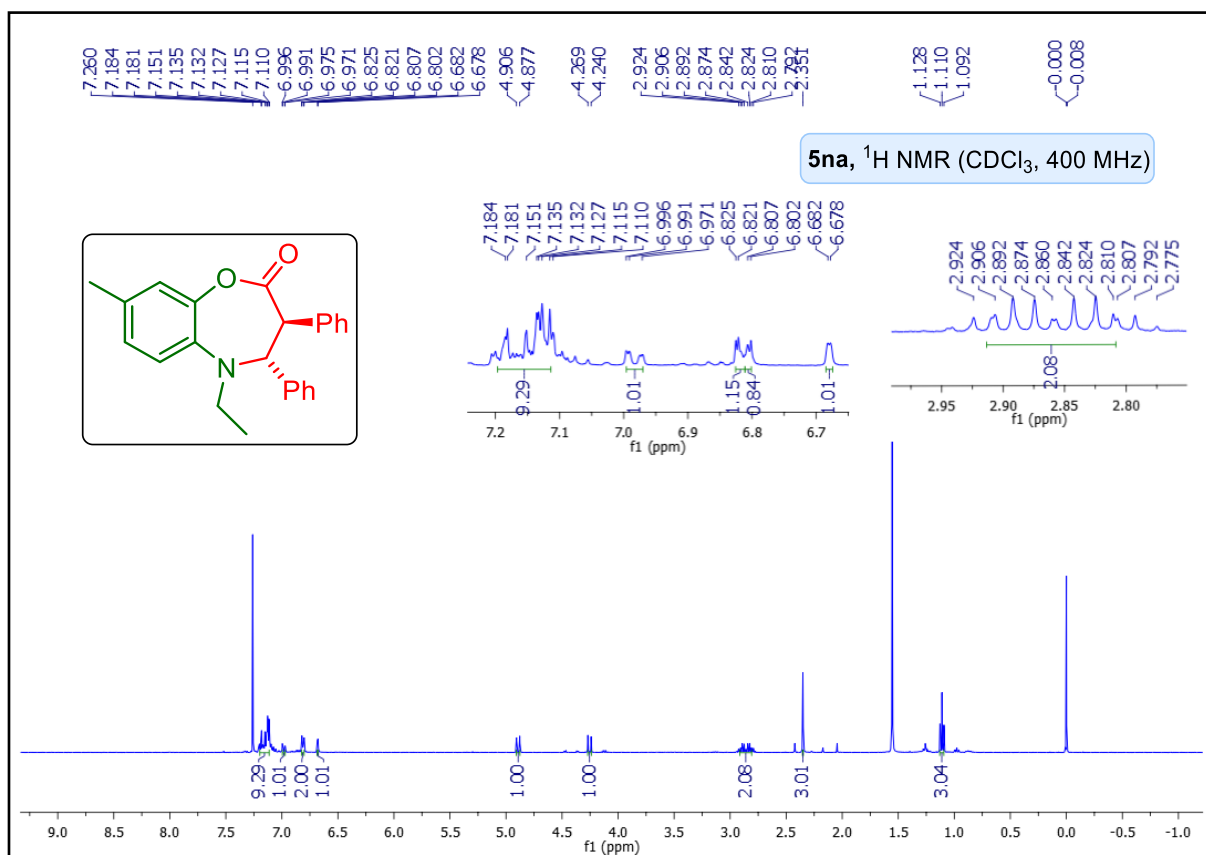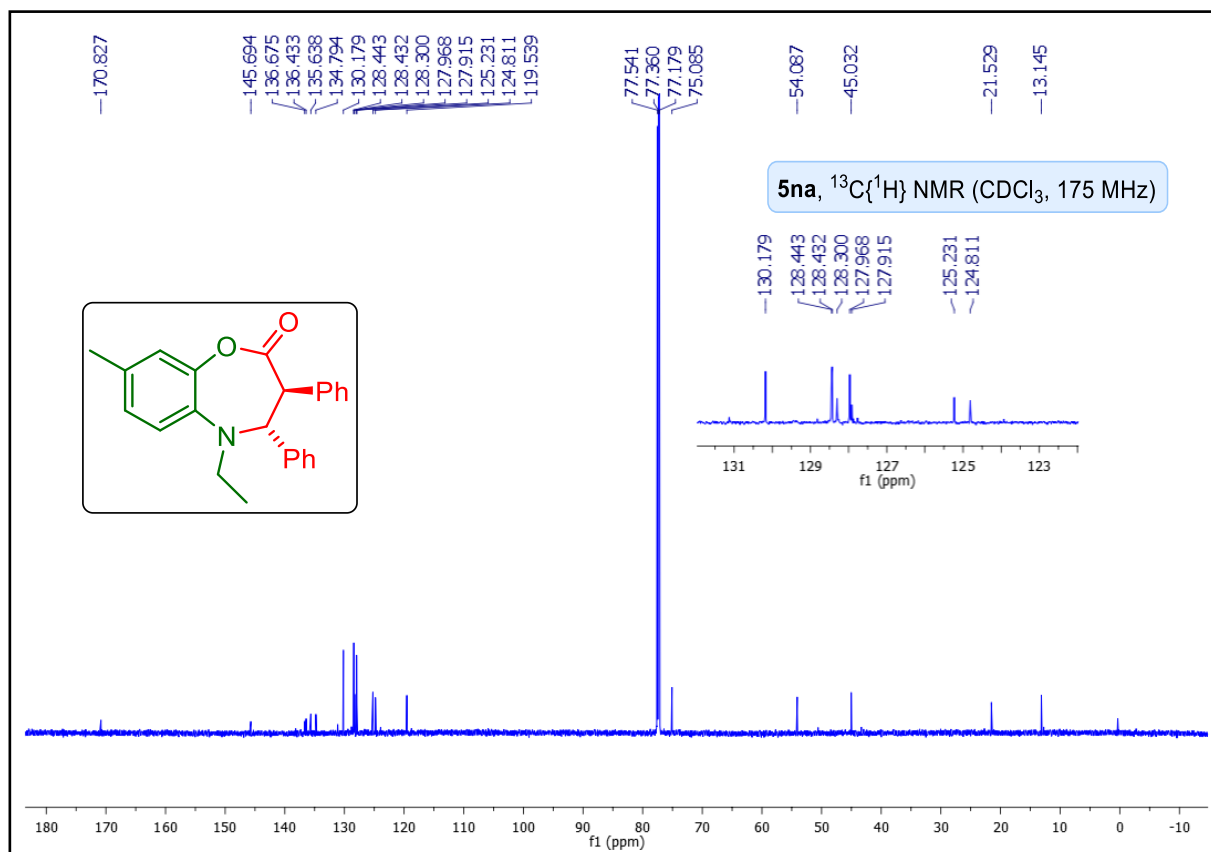

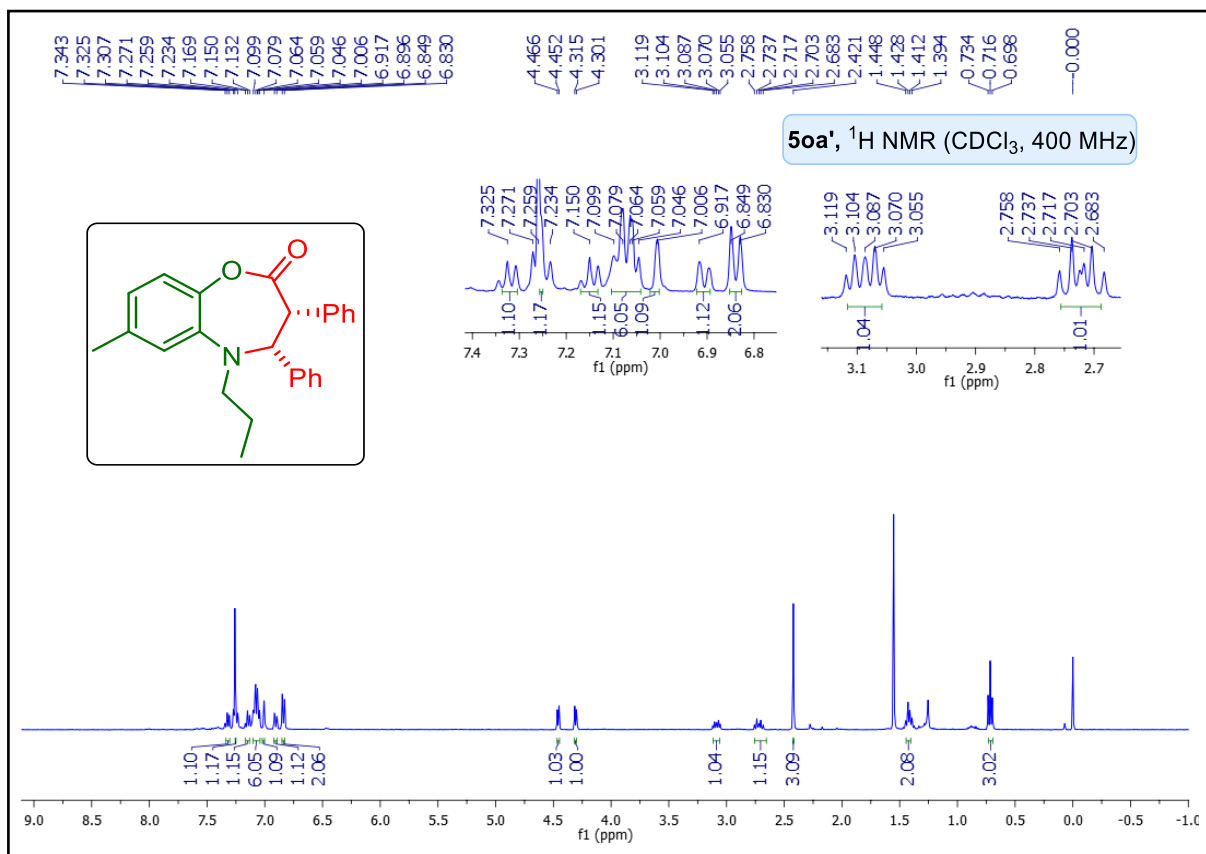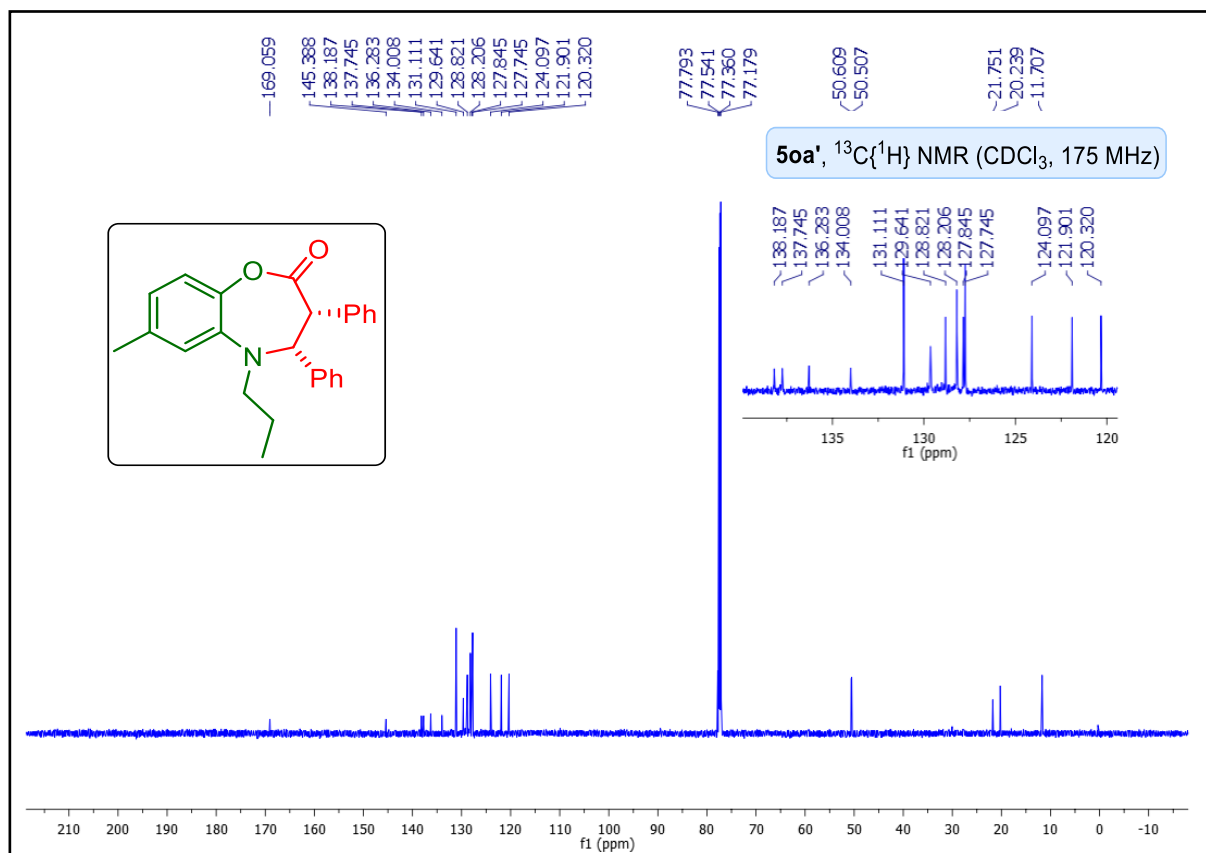



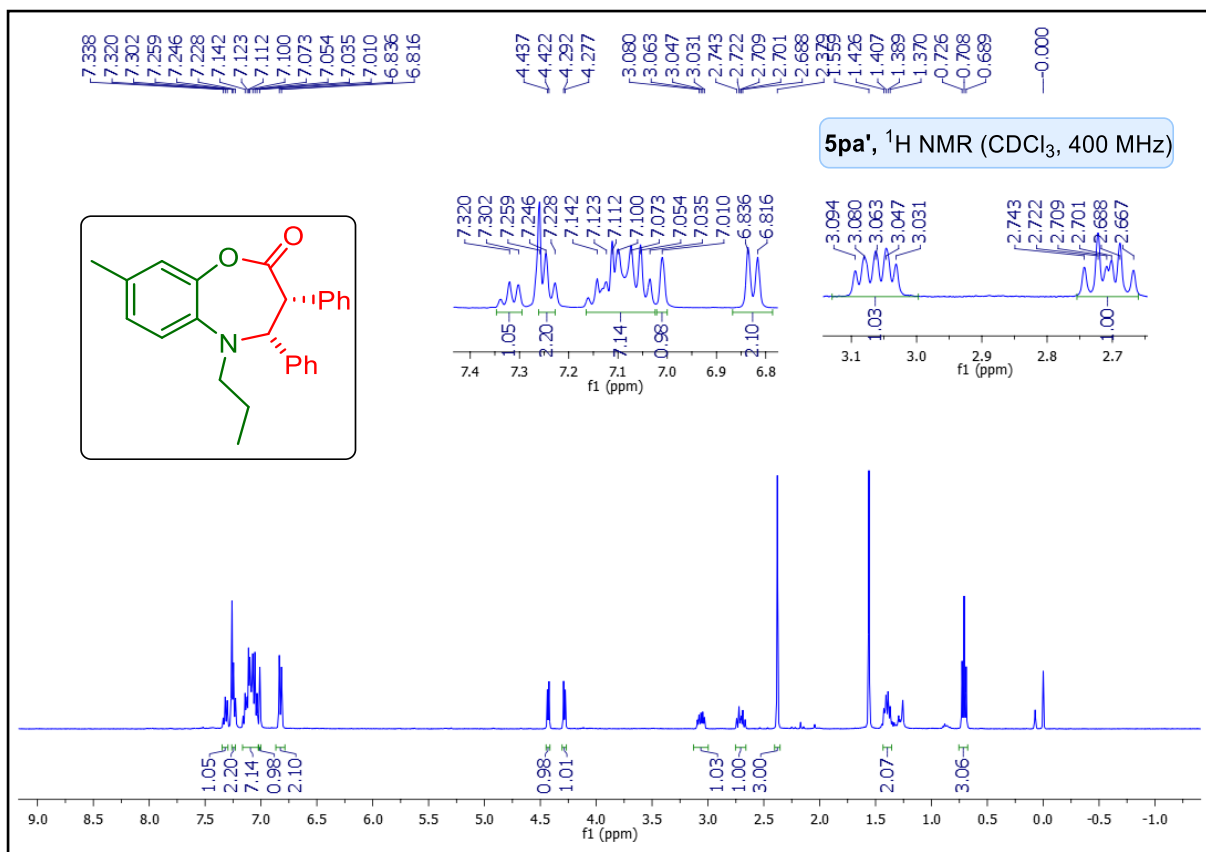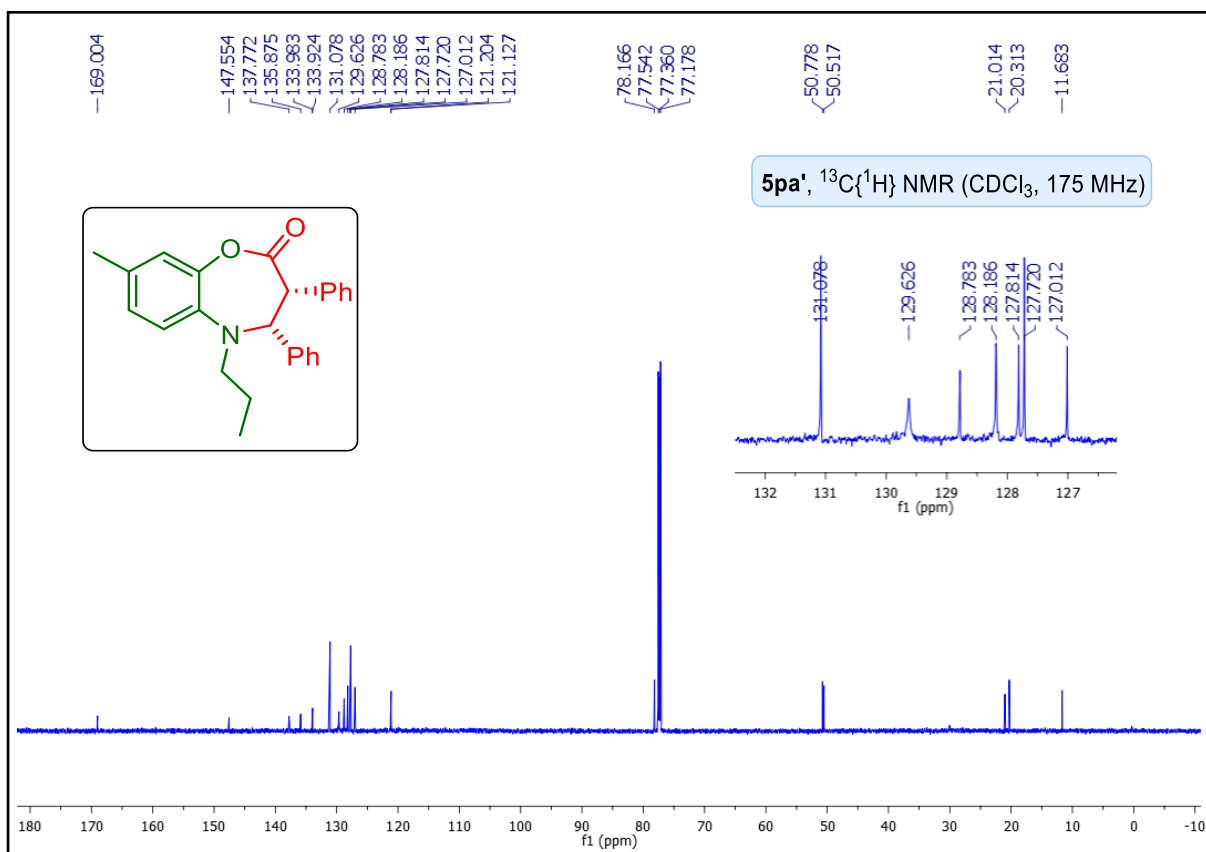



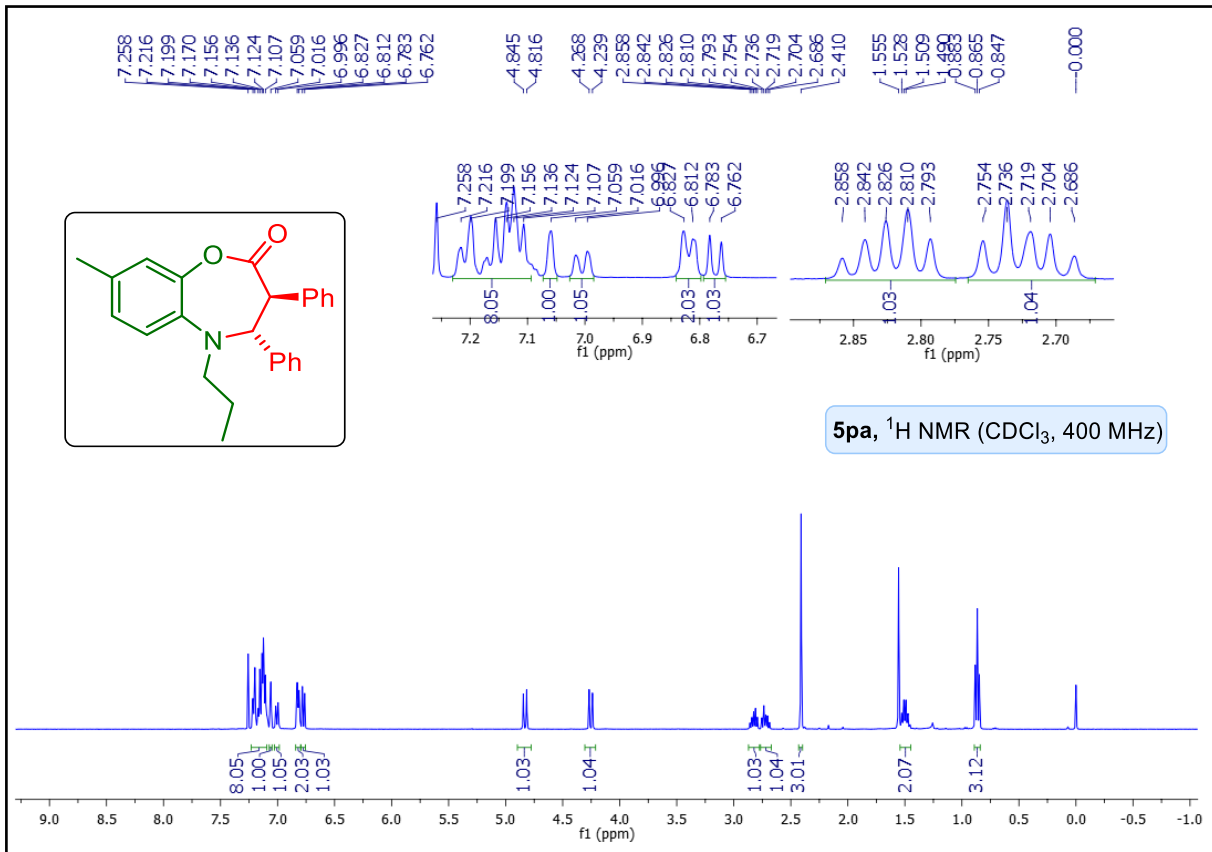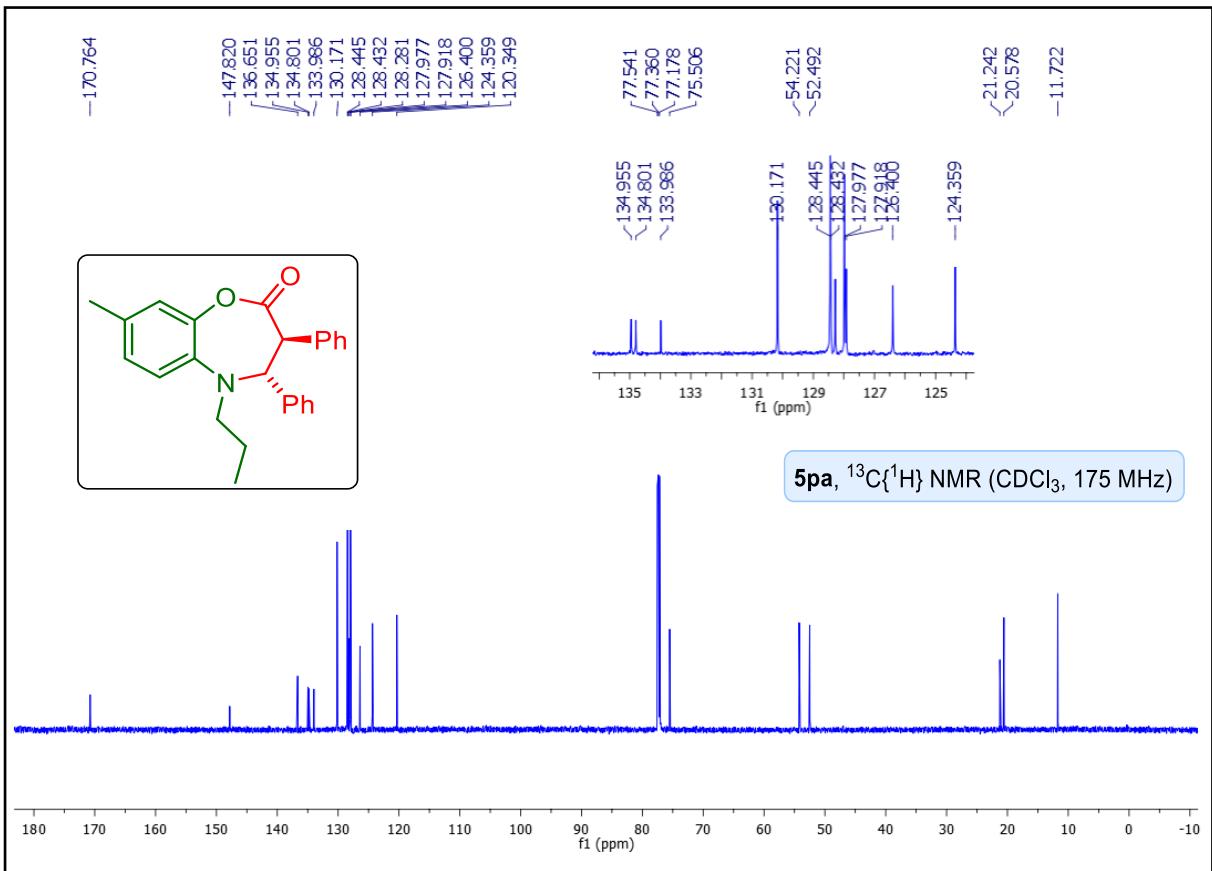

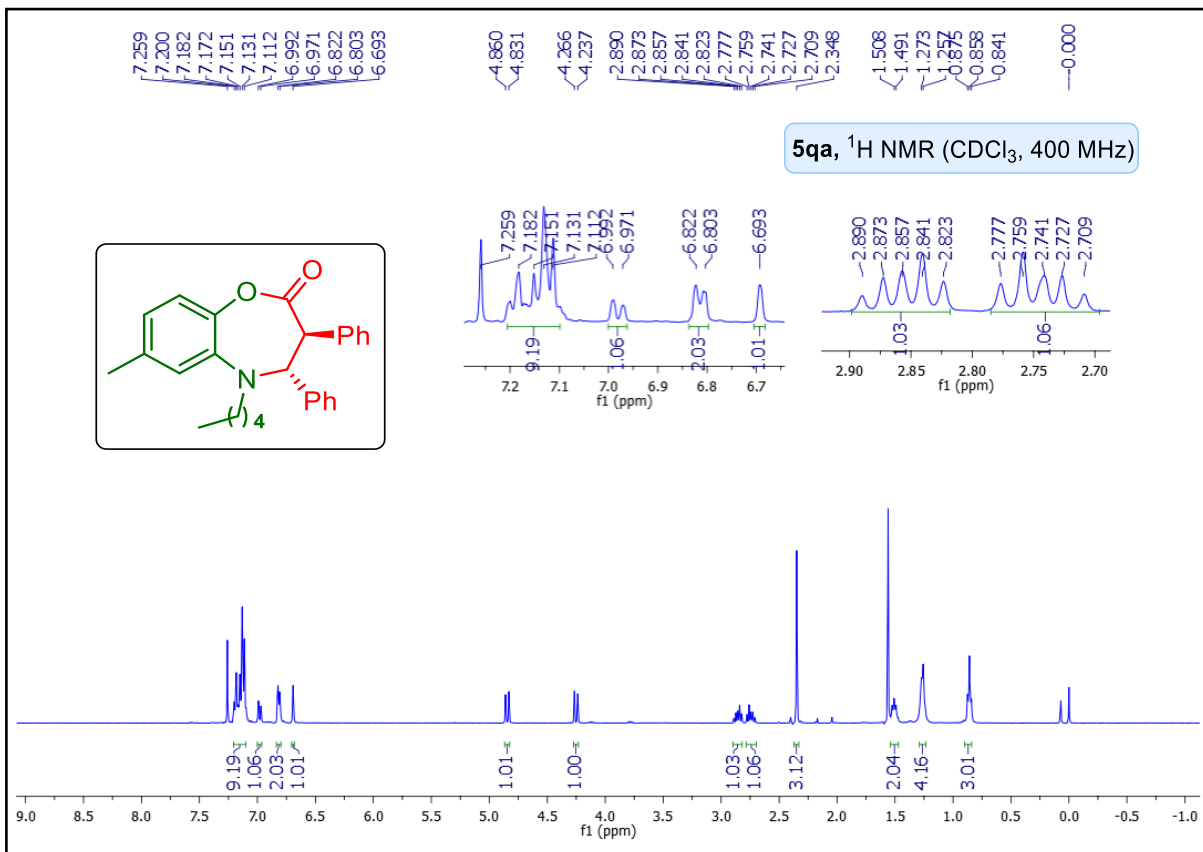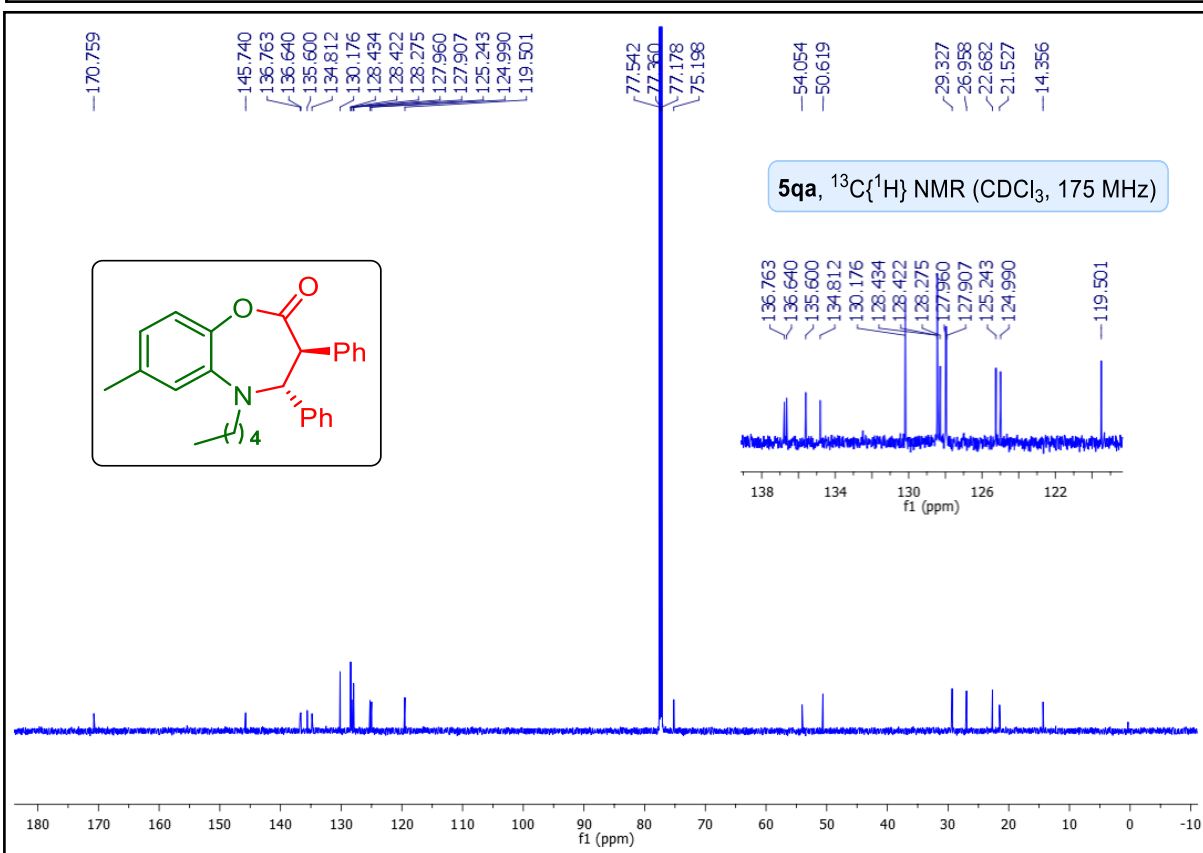

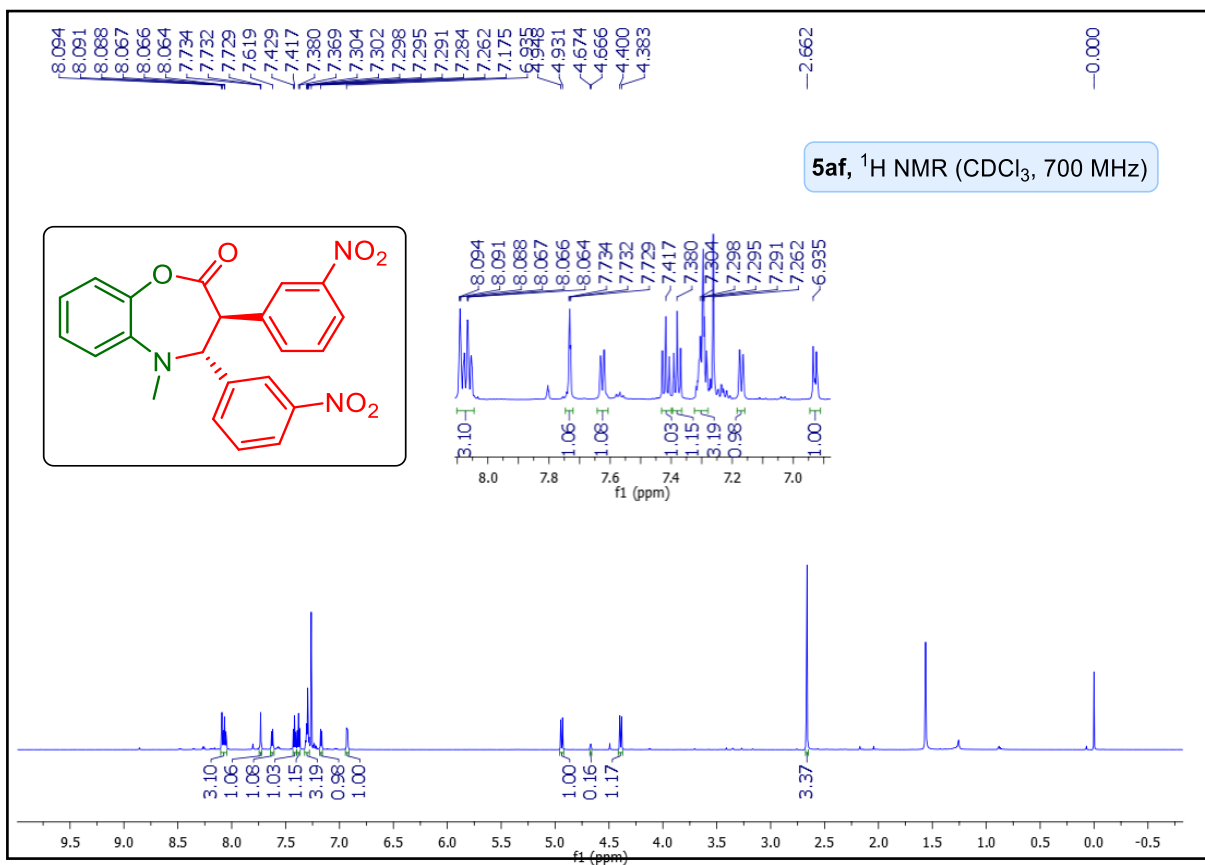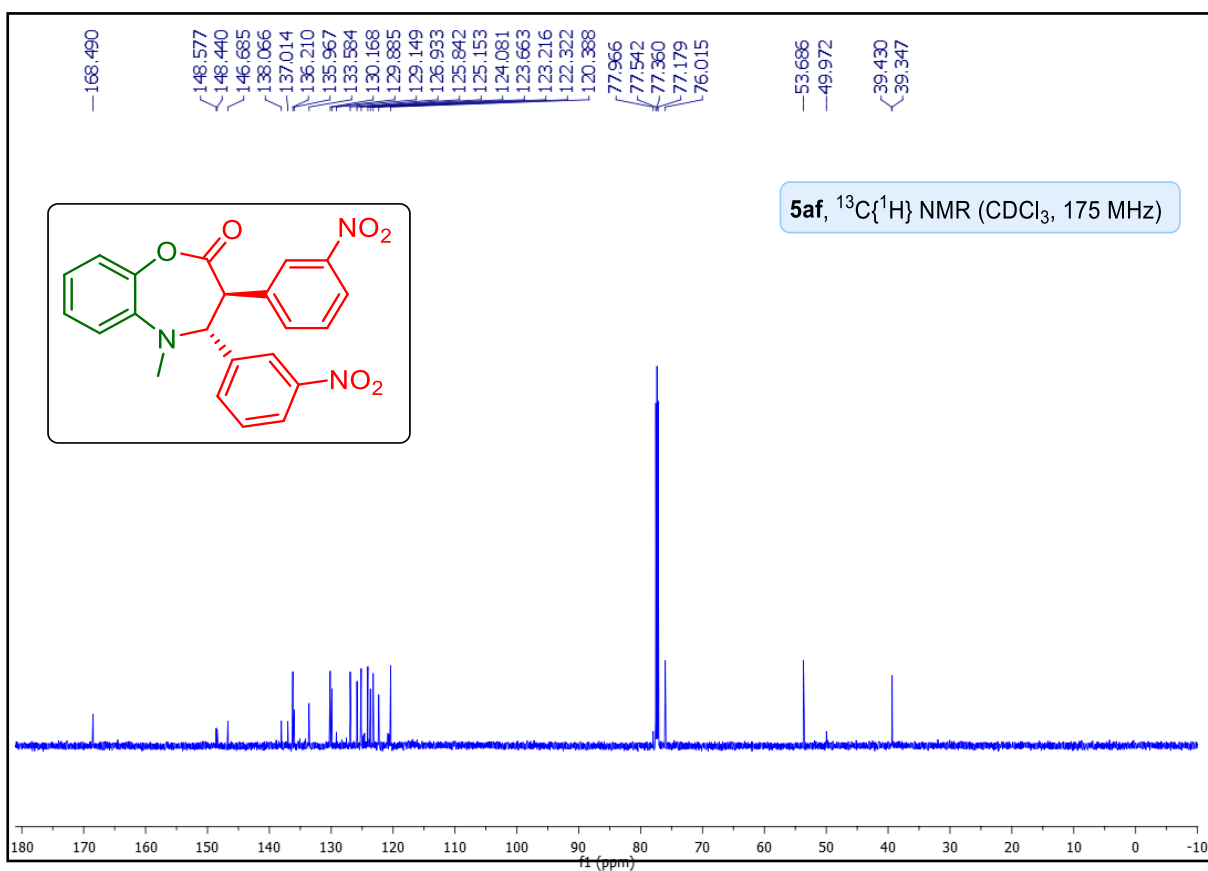

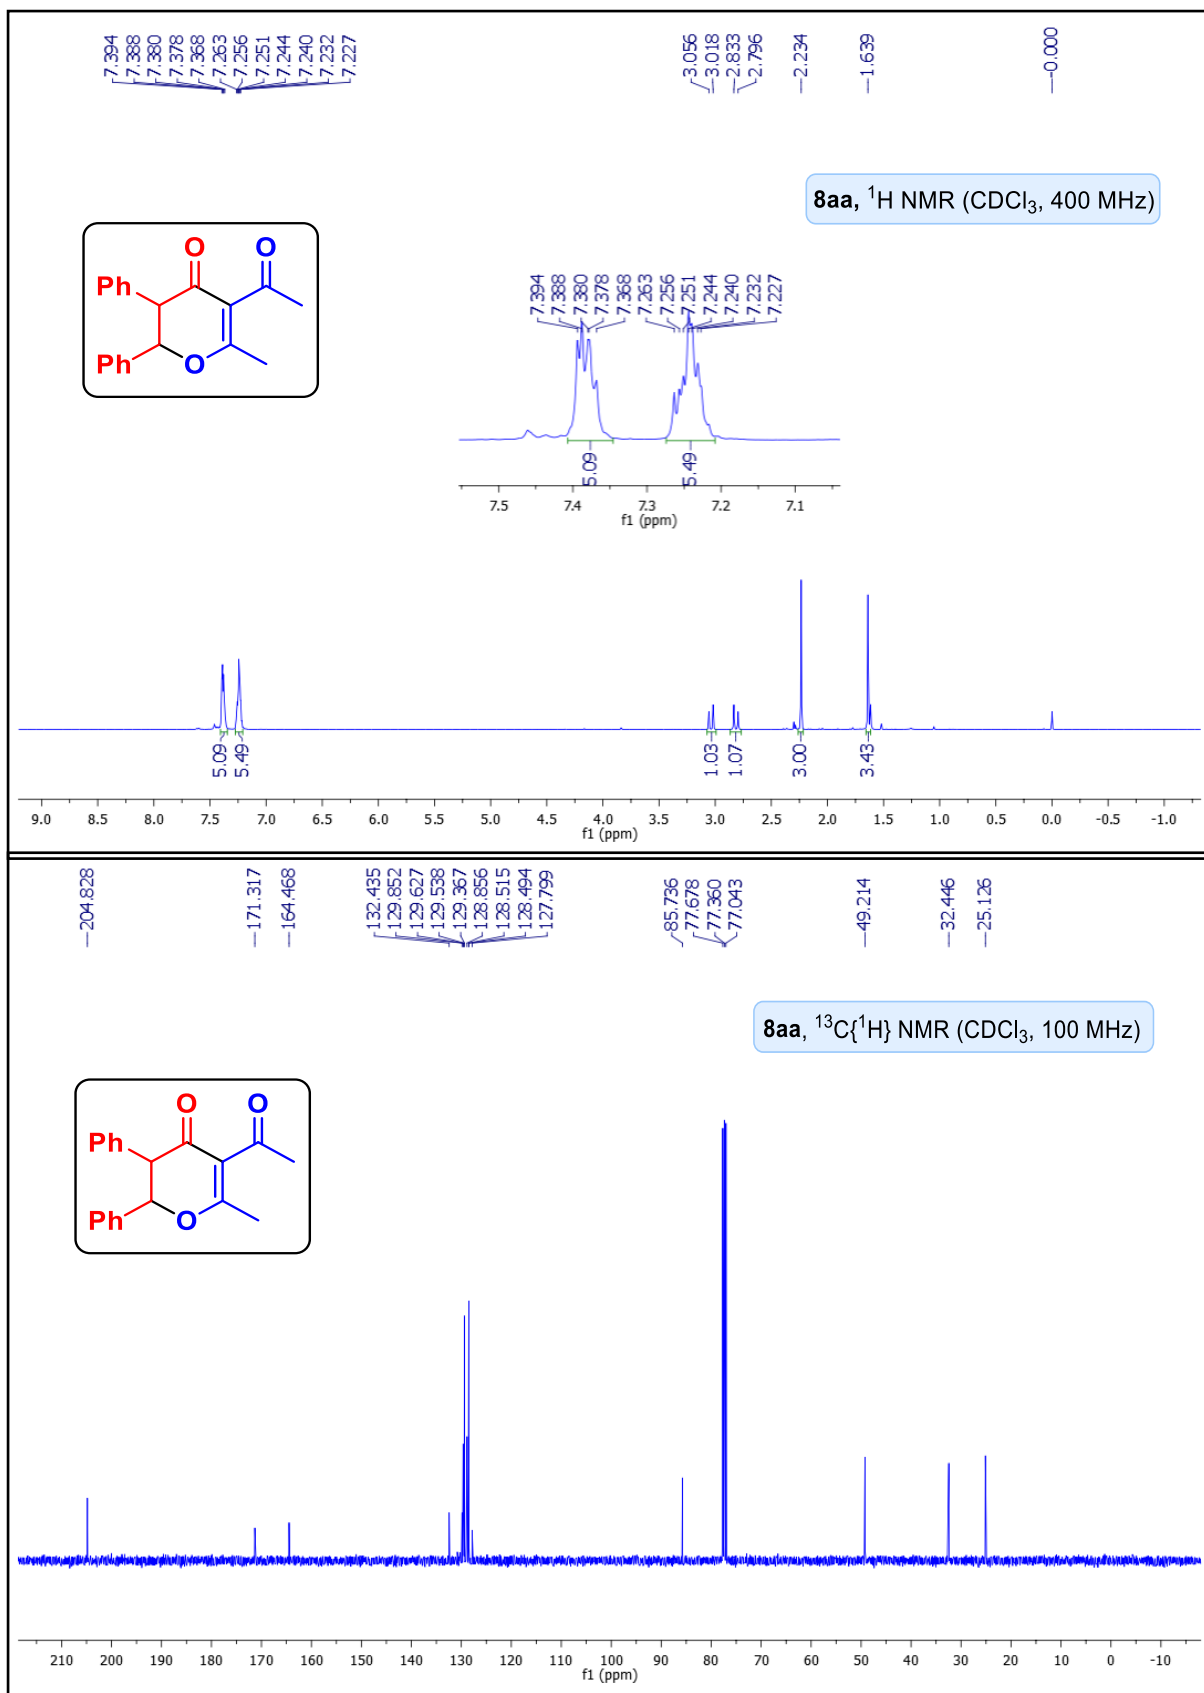

## 6. Crystallographic data:

**X-ray data of (3S,4R)-1-(2-hydroxy-4-methylphenyl)-3,4-diphenylazetidin-2-one (3ea):** Crystals of the compound (3S,4R)-1-(2-hydroxy-4-methylphenyl)-3,4-diphenylazetidin-2-one (**3ea**) were obtained after slow evaporation of EtOAc. Crystals suited for single crystal X-Ray diffraction measurements were mounted on a glass fiber. Geometry and intensity data were collected with a Rigaku Smartlab X-ray diffractometer equipped with graphite-monochromated Mo-K $\alpha$  radiation ( $\lambda = 0.71073 \text{ \AA}$ , multilayer optics). Temperature was controlled using an Oxford Cryostream 700 instrument. Intensities were integrated with SAINT and SMART software packages and corrected for absorption with SADABS. The structure was solved by direct methods and refined on F2 with SHELXL-97 using Olex-2 software.

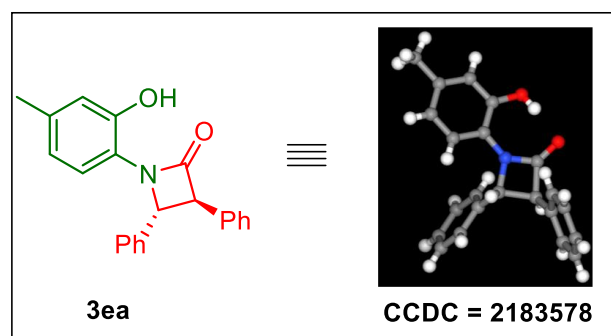

Datablock pcr\_as\_140\_auto - ellipsoid plot

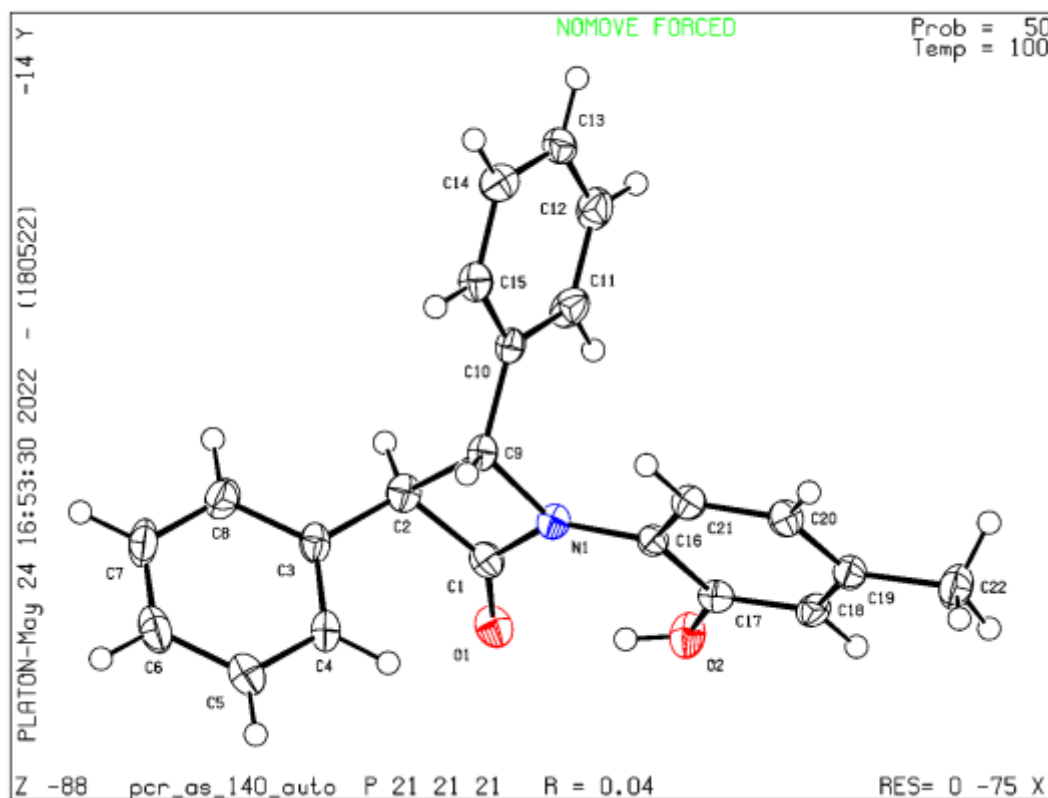

**Figure S1.** ORTEP diagram of **3ea** with 50% ellipsoid probability

**Table S1.** Crystal data and structure refinement for **(3S,4R)-1-(2-hydroxy-4-methylphenyl)-3,4-diphenylazetid-2-one (3ea)**:

|                                             |                                                               |
|---------------------------------------------|---------------------------------------------------------------|
| Identification code                         | PCR_AS_140_auto                                               |
| Empirical formula                           | C <sub>22</sub> H <sub>19</sub> NO <sub>2</sub>               |
| Formula weight                              | 329.38                                                        |
| Temperature/K                               | 100.01(10)                                                    |
| Crystal system                              | orthorhombic                                                  |
| Space group                                 | P2 <sub>1</sub> 2 <sub>1</sub> 2 <sub>1</sub>                 |
| a/Å                                         | 8.0510(3)                                                     |
| b/Å                                         | 12.5184(6)                                                    |
| c/Å                                         | 16.9921(7)                                                    |
| α/°                                         | 90                                                            |
| β/°                                         | 90                                                            |
| γ/°                                         | 90                                                            |
| Volume/Å <sup>3</sup>                       | 1712.56(13)                                                   |
| Z                                           | 4                                                             |
| ρ <sub>calc</sub> /cm <sup>3</sup>          | 1.278                                                         |
| μ/mm <sup>-1</sup>                          | 0.082                                                         |
| F(000)                                      | 696.0                                                         |
| Crystal size/mm <sup>3</sup>                | 0.2 × 0.1 × 0.1                                               |
| Radiation                                   | Mo Kα (λ = 0.71073)                                           |
| 2θ range for data collection/°              | 6.938 to 60.936                                               |
| Index ranges                                | -11 ≤ h ≤ 10, -17 ≤ k ≤ 16, -18 ≤ l ≤ 24                      |
| Reflections collected                       | 11357                                                         |
| Independent reflections                     | 3736 [R <sub>int</sub> = 0.0393, R <sub>sigma</sub> = 0.0417] |
| Data/restraints/parameters                  | 3736/0/228                                                    |
| Goodness-of-fit on F <sup>2</sup>           | 1.035                                                         |
| Final R indexes [I ≥ 2σ (I)]                | R <sub>1</sub> = 0.0406, wR <sub>2</sub> = 0.1026             |
| Final R indexes [all data]                  | R <sub>1</sub> = 0.0478, wR <sub>2</sub> = 0.1056             |
| Largest diff. peak/hole / e Å <sup>-3</sup> | 0.30/-0.18                                                    |
| Flack parameter                             | -0.1(7)                                                       |

## checkCIF/PLATON report

Structure factors have been supplied for datablock(s) pcr\_as\_140\_auto

THIS REPORT IS FOR GUIDANCE ONLY. IF USED AS PART OF A REVIEW PROCEDURE FOR PUBLICATION, IT SHOULD NOT REPLACE THE EXPERTISE OF AN EXPERIENCED CRYSTALLOGRAPHIC REFEREE.

No syntax errors found. CIF dictionary Interpreting this report

### Datablock: pcr\_as\_140\_auto

---

Bond precision: C-C = 0.0030 A Wavelength=0.71073  
Cell: a=8.0510(3) b=12.5184(6) c=16.9921(7)  
alpha=90 beta=90 gamma=90  
Temperature: 100 K

|                        | Calculated   | Reported     |
|------------------------|--------------|--------------|
| Volume                 | 1712.56(13)  | 1712.56(13)  |
| Space group            | P 21 21 21   | P 21 21 21   |
| Hall group             | P 2ac 2ab    | P 2ac 2ab    |
| Moiety formula         | C22 H19 N O2 | C22 H19 N O2 |
| Sum formula            | C22 H19 N O2 | C22 H19 N O2 |
| Mr                     | 329.38       | 329.38       |
| Dx, g cm <sup>-3</sup> | 1.278        | 1.278        |
| Z                      | 4            | 4            |
| Mu (mm <sup>-1</sup> ) | 0.082        | 0.082        |
| F000                   | 696.0        | 696.0        |
| F000'                  | 696.30       |              |
| h, k, lmax             | 11, 17, 24   | 11, 17, 24   |
| Nref                   | 5205[ 2949]  | 3736         |
| Tmin, Tmax             | 0.990, 0.992 | 0.929, 1.000 |
| Tmin'                  | 0.984        |              |

Correction method= # Reported T Limits: Tmin=0.929 Tmax=1.000  
AbsCorr = MULTI-SCAN

Data completeness= 1.27/0.72 Theta(max)= 30.468

R(reflections)= 0.0406( 3322) wR2(reflections)=  
S = 1.035 Npar= 228 0.1056( 3736)

---

The following ALERTS were generated. Each ALERT has the format  
**test-name\_ALERT\_alert-type\_alert-level**.  
Click on the hyperlinks for more details of the test.

---

● **Alert level C**

STRVA01\_ALERT\_4\_C                    Flack test results are meaningless.  
    From the CIF: `_refine_ls_abs_structure_Flack`    -0.100  
    From the CIF: `_refine_ls_abs_structure_Flack_su`    0.700  
PLAT790\_ALERT\_4\_C Centre of Gravity not Within Unit Cell: Resd. #                    1 Note  
    C22 H19 N O2  
PLAT910\_ALERT\_3\_C Missing # of PCF Reflection(s) Below Theta(Min).                7 Note  
PLAT911\_ALERT\_3\_C Missing PCF Refl Between Thmin & STh/L=    0.600                2 Report  
PLAT915\_ALERT\_3\_C No Flack x Check Done: Low Friedel Pair Coverage                59 %

---

● **Alert level G**

PLAT007\_ALERT\_5\_G Number of Unrefined Donor-H Atoms .....                    1 Report  
PLAT032\_ALERT\_4\_G Std. Uncertainty on Flack Parameter Value High .                0.700 Report  
PLAT791\_ALERT\_4\_G Model has Chirality at C2                    (Sohnke SpGr)                S Verify  
PLAT791\_ALERT\_4\_G Model has Chirality at C9                    (Sohnke SpGr)                R Verify  
PLAT912\_ALERT\_4\_G Missing # of PCF Reflections Above STh/L=    0.600                530 Note  
PLAT916\_ALERT\_2\_G Hooft y and Flack x Parameter Values Differ by .                0.20 Check  
PLAT941\_ALERT\_3\_G Average HKL Measurement Multiplicity .....                    4.7 Low  
PLAT978\_ALERT\_2\_G Number C-C Bonds with Positive Residual Density.                10 Info

---

0 **ALERT level A** = Most likely a serious problem - resolve or explain  
0 **ALERT level B** = A potentially serious problem, consider carefully  
5 **ALERT level C** = Check. Ensure it is not caused by an omission or oversight  
8 **ALERT level G** = General information/check it is not something unexpected

0 ALERT type 1 CIF construction/syntax error, inconsistent or missing data  
2 ALERT type 2 Indicator that the structure model may be wrong or deficient  
4 ALERT type 3 Indicator that the structure quality may be low  
6 ALERT type 4 Improvement, methodology, query or suggestion  
1 ALERT type 5 Informative message, check

---



**X-ray data of (3S,4R)-5-ethyl-3,4-diphenyl-4,5-dihydrobenzo[b][1,4]oxazepin-2(3H)-one (5fa):** Crystals of the compound (3S,4R)-5-ethyl-3,4-diphenyl-4,5-dihydrobenzo[b][1,4]oxazepin-2(3H)-one (**5fa**) were obtained after slow evaporation of EtOAc. Crystals suited for single crystal X-Ray diffraction measurements were mounted on a glass fiber. Geometry and intensity data were collected with a Rigaku Smartlab X-ray diffractometer equipped with graphite-monochromated Mo-K $\alpha$  radiation ( $\lambda = 0.71073 \text{ \AA}$ , multilayer optics). Temperature was controlled using an Oxford Cryostream 700 instrument. Intensities were integrated with SAINT and SMART software packages and corrected for absorption with SADABS. The structure was solved by direct methods and refined on F2 with SHELXL-97 using Olex-2 software.

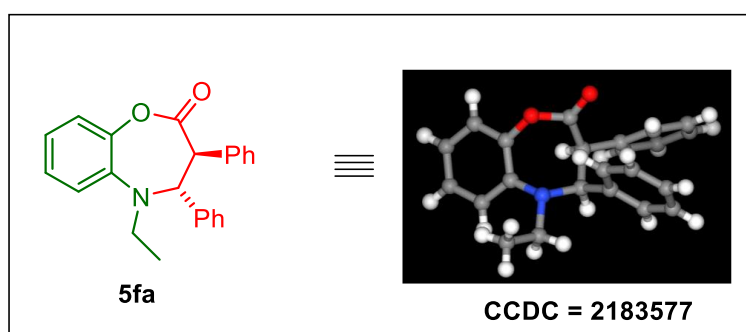

Datablock as-124-a\_auto - ellipsoid plot

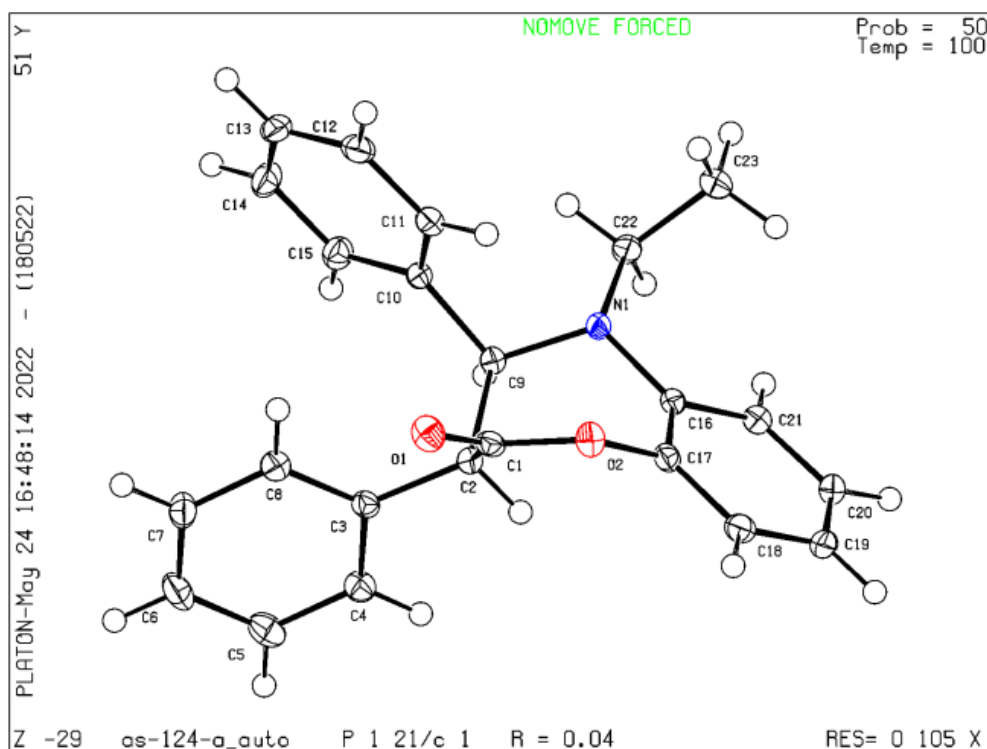

**Figure S2.** ORTEP diagram of **5fa** with 50% ellipsoid probability

**Table S2.** Crystal data and structure refinement for (3*S*,4*R*)-5-ethyl-3,4-diphenyl-4,5-dihydrobenzo[*b*][1,4]oxazepin-2(3*H*)-one (5*fa*):

|                                             |                                                               |
|---------------------------------------------|---------------------------------------------------------------|
| Identification code                         | AS-124-A_auto                                                 |
| Empirical formula                           | C <sub>23</sub> H <sub>21</sub> NO <sub>2</sub>               |
| Formula weight                              | 343.41                                                        |
| Temperature/K                               | 100.00(10)                                                    |
| Crystal system                              | monoclinic                                                    |
| Space group                                 | P2 <sub>1</sub> /c                                            |
| a/Å                                         | 12.1816(4)                                                    |
| b/Å                                         | 8.6211(3)                                                     |
| c/Å                                         | 17.1645(6)                                                    |
| α/°                                         | 90                                                            |
| β/°                                         | 96.736(3)                                                     |
| γ/°                                         | 90                                                            |
| Volume/Å <sup>3</sup>                       | 1790.15(11)                                                   |
| Z                                           | 4                                                             |
| ρ <sub>calc</sub> /cm <sup>3</sup>          | 1.274                                                         |
| μ/mm <sup>-1</sup>                          | 0.081                                                         |
| F(000)                                      | 728.0                                                         |
| Crystal size/mm <sup>3</sup>                | 0.2 × 0.1 × 0.1                                               |
| Radiation                                   | Mo Kα (λ = 0.71073)                                           |
| 2θ range for data collection/°              | 6.736 to 61.014                                               |
| Index ranges                                | -16 ≤ h ≤ 14, -11 ≤ k ≤ 11, -22 ≤ l ≤ 23                      |
| Reflections collected                       | 20789                                                         |
| Independent reflections                     | 4460 [R <sub>int</sub> = 0.0379, R <sub>sigma</sub> = 0.0287] |
| Data/restraints/parameters                  | 4460/0/236                                                    |
| Goodness-of-fit on F <sup>2</sup>           | 1.071                                                         |
| Final R indexes [I ≥ 2σ (I)]                | R <sub>1</sub> = 0.0377, wR <sub>2</sub> = 0.0938             |
| Final R indexes [all data]                  | R <sub>1</sub> = 0.0436, wR <sub>2</sub> = 0.0969             |
| Largest diff. peak/hole / e Å <sup>-3</sup> | 0.35/-0.20                                                    |



---

The following ALERTS were generated. Each ALERT has the format  
**test-name\_ALERT\_alert-type\_alert-level**.  
Click on the hyperlinks for more details of the test.

---

**Alert level C**

PLAT910\_ALERT\_3\_C Missing # of FCF Reflection(s) Below Theta(Min). 9 Note

---

**Alert level G**

PLAT793\_ALERT\_4\_G Model has Chirality at C2 (Centro SPGR) S Verify  
PLAT793\_ALERT\_4\_G Model has Chirality at C9 (Centro SPGR) S Verify  
PLAT912\_ALERT\_4\_G Missing # of FCF Reflections Above STh/L= 0.600 931 Note  
PLAT941\_ALERT\_3\_G Average HKL Measurement Multiplicity ..... 4.7 Low  
PLAT978\_ALERT\_2\_G Number C-C Bonds with Positive Residual Density. 21 Info  
PLAT992\_ALERT\_5\_G Repd & Actual \_reflns\_number\_gt Values Differ by 3 Check

---

0 ALERT level A = Most likely a serious problem - resolve or explain  
0 ALERT level B = A potentially serious problem, consider carefully  
1 ALERT level C = Check. Ensure it is not caused by an omission or oversight  
6 ALERT level G = General information/check it is not something unexpected

0 ALERT type 1 CIF construction/syntax error, inconsistent or missing data  
1 ALERT type 2 Indicator that the structure model may be wrong or deficient  
2 ALERT type 3 Indicator that the structure quality may be low  
3 ALERT type 4 Improvement, methodology, query or suggestion  
1 ALERT type 5 Informative message, check

---

---

## 7. Reference:

- (1) (a) Similar information was reported in Banjare, S. K.; Nanda, T.; Ravikumar, P. C. Cobalt-Catalyzed Regioselective Direct C-4 Alkenylation of 3-Acetylintole with Michael Acceptors Using a Weakly Coordinating Functional Group. *Org. Lett.* **2019**, *21*, 8138–8143.
- (2) Gottlieb, H. E.; Kotlyar, V.; Nudelman, A. NMR chemical shifts of common laboratory solvents as trace impurities. *J. Org. Chem.* **1997**, *62*, 7512.
- (3) Matralis, A. N.; Katselou, M. G.; Nikitakis, A.; Kourounakis, A. P. Novel Benzoxazine and Benzothiazine Derivatives as Multifunctional Antihyperlipidemic Agents. *J. Med. Chem.* **2011**, *54*, 5583–5591.
- (4) Nanda, T.; Biswal, P.; Pati, B. V.; Banjare, S. K.; Ravikumar, P. C. Palladium-Catalyzed C-C Bond Activation of Cyclopropanone: Modular Access to Trisubstituted  $\alpha,\beta$ -Unsaturated Esters and Amides. *J. Org. Chem.* **2021**, *86*, 2682–2695.
